# Supplementary material for: 4-(Pyrazolyl)benzenesulfonamide Ureas as Carbonic Anhydrases Inhibitors and Hypoxia-Mediated Chemo-Sensitizing Agents in Colorectal Cancer Cells
Source: PubMed Central journal article supplement (PMC11613454; doi:10.1021/acs.jmedchem.4c01894), 2024-11-17
Supplement: jm4c01894_si_001.pdf [file jm4c01894_si_001.pdf]

## Supporting information

### 4-(Pyrazolyl)benzenesulfonamide ureas as carbonic anhydrases inhibitors and hypoxia-mediated chemo-sensitizing agents in colorectal cancer cells

Wagdy M. Eldehna,<sup>1,2\*</sup> Mohamed Fares,<sup>3,4</sup> Alessandro Bonardi,<sup>5</sup> Moscos Avgenikos,<sup>6</sup> Fady Baselious,<sup>7</sup> Matthias Schmidt,<sup>7</sup> Tarfah Al-Warhi,<sup>8</sup> Hatem A. Abdel-Aziz,<sup>9</sup> Robert Rennert,<sup>6</sup> Thomas S. Peat,<sup>10</sup> Claudiu T. Supuran,<sup>5</sup> Ludger A. Wessjohann,<sup>6,\*</sup> and Hany S. Ibrahim,<sup>3,6,7,\*</sup>

<sup>1</sup> *Department of Pharmaceutical Chemistry, Faculty of Pharmacy, Kafrelsheikh University, Kafrelsheikh 33516, Egypt.*

<sup>2</sup> *Department of Pharmaceutical Chemistry, Faculty of Pharmacy, Pharos University in Alexandria; Canal El Mahmoudia St., Alexandria 21648, Egypt*

<sup>3</sup> *Department of Pharmaceutical Chemistry, Faculty of Pharmacy, Egyptian Russian University, Badr City, Cairo 11829, Egypt*

<sup>4</sup> *Sydney Pharmacy School, the University of Sydney, NSW 2006, Australia*

<sup>5</sup> *Università degli Studi di Firenze, Department NEUROFARBA – Pharmaceutical and Nutraceutical section, University of Firenze, via Ugo Schiff 6, I-50019 Sesto Fiorentino, Firenze, Italy.*

<sup>6</sup> *Leibniz Institute of Plant Biochemistry, Department of Bioorganic Chemistry, D-06120 Halle (Saale), Germany*

<sup>7</sup> *Department of Medicinal Chemistry, Institute of Pharmacy, Martin-Luther-University of Halle-Wittenberg, D-06120 Halle (Saale), Germany*

<sup>8</sup> *Department of Chemistry, College of Science, Princess Nourah bint Abdulrahman University, Riyadh, Saudi Arabia*

<sup>9</sup> *Applied Organic Chemistry Department, National Research Center, Dokki 12622, Cairo, Egypt*

<sup>10</sup> *School of Biotechnology and Biomolecular Sciences, University of New South Wales, Sydney, NSW 2052, Australia.*

#### Corresponding Authors

[wagdy2000@gmail.com](mailto:wagdy2000@gmail.com) (W.M. Eldehna), [Ludger.Wessjohann@ipb-halle.de](mailto:Ludger.Wessjohann@ipb-halle.de) (L. Wessjohann), and [hany.ibrahim@pharmazie.uni-halle.de](mailto:hany.ibrahim@pharmazie.uni-halle.de) (H.S. Ibrahim).

|          | <b>Topic</b>                                                                            | <b>Page</b> |
|----------|-----------------------------------------------------------------------------------------|-------------|
| <b>1</b> | <b><sup>1</sup>H and <sup>13</sup>C NMR charts of final compounds</b>                   | <b>S6</b>   |
|          | <b>Figure S1.</b> <sup>1</sup> H NMR spectrum of compound <b>7a</b>                     | <b>S6</b>   |
|          | <b>Figure S2.</b> <sup>1</sup> H NMR spectrum of compound <b>7c</b>                     | <b>S7</b>   |
|          | <b>Figure S3.</b> <sup>1</sup> H NMR spectrum of compound <b>7f</b>                     | <b>S8</b>   |
|          | <b>Figure S4.</b> <sup>1</sup> H NMR spectrum of compound <b>7g</b> (D <sub>2</sub> O)  | <b>S9</b>   |
|          | <b>Figure S5.</b> <sup>1</sup> H NMR spectrum of compound <b>7h</b>                     | <b>S10</b>  |
|          | <b>Figure S6.</b> <sup>1</sup> H NMR spectrum of compound <b>7h</b> (D <sub>2</sub> O)  | <b>S11</b>  |
|          | <b>Figure S7.</b> <sup>1</sup> H NMR spectrum of compound <b>7i</b>                     | <b>S12</b>  |
|          | <b>Figure S8.</b> <sup>1</sup> H NMR spectrum of compound <b>7i</b> (D <sub>2</sub> O)  | <b>S13</b>  |
|          | <b>Figure S9.</b> <sup>13</sup> C NMR spectrum of compound <b>7i</b>                    | <b>S14</b>  |
|          | <b>Figure S10.</b> <sup>1</sup> H NMR spectrum of compound <b>7j</b>                    | <b>S15</b>  |
|          | <b>Figure S11.</b> <sup>1</sup> H NMR spectrum of compound <b>7j</b> (D <sub>2</sub> O) | <b>S16</b>  |
|          | <b>Figure S12.</b> <sup>1</sup> H NMR spectrum of compound <b>7k</b> (D <sub>2</sub> O) | <b>S17</b>  |
|          | <b>Figure S13.</b> <sup>1</sup> H NMR spectrum of compound <b>7l</b>                    | <b>S18</b>  |
|          | <b>Figure S14.</b> <sup>1</sup> H NMR spectrum of compound <b>7l</b> (D <sub>2</sub> O) | <b>S19</b>  |
|          | <b>Figure S15.</b> <sup>1</sup> H NMR spectrum of compound <b>7m</b>                    | <b>S20</b>  |
|          | <b>Figure S16.</b> <sup>1</sup> H NMR spectrum of compound <b>7m</b> (D <sub>2</sub> O) | <b>S21</b>  |
|          | <b>Figure S17.</b> <sup>1</sup> H NMR spectrum of compound <b>7n</b>                    | <b>S22</b>  |
|          | <b>Figure S18.</b> <sup>1</sup> H NMR spectrum of compound <b>7n</b> (D <sub>2</sub> O) | <b>S23</b>  |
|          | <b>Figure S19.</b> <sup>13</sup> C NMR spectrum of compound <b>7n</b>                   | <b>S24</b>  |
|          | <b>Figure S20.</b> <sup>1</sup> H NMR spectrum of compound <b>7o</b>                    | <b>S25</b>  |
|          | <b>Figure S21.</b> <sup>1</sup> H NMR spectrum of compound <b>7o</b> (D <sub>2</sub> O) | <b>S26</b>  |
|          | <b>Figure S22.</b> <sup>1</sup> H NMR spectrum of compound <b>7p</b> (D <sub>2</sub> O) | <b>S27</b>  |
|          | <b>Figure S23.</b> <sup>1</sup> H NMR spectrum of compound <b>7q</b>                    | <b>S28</b>  |
|          | <b>Figure S24.</b> <sup>1</sup> H NMR spectrum of compound <b>7q</b> (D <sub>2</sub> O) | <b>S29</b>  |
|          | <b>Figure S24.</b> <sup>1</sup> H NMR spectrum of compound <b>7r</b>                    | <b>S30</b>  |
|          | <b>Figure S26.</b> <sup>1</sup> H NMR spectrum of compound <b>7r</b> (D <sub>2</sub> O) | <b>S31</b>  |
|          | <b>Figure S27.</b> <sup>1</sup> H NMR spectrum of compound <b>7s</b>                    | <b>S32</b>  |
|          | <b>Figure S28.</b> <sup>1</sup> H NMR spectrum of compound <b>7s</b> (D <sub>2</sub> O) | <b>S33</b>  |

|                                                                                             |            |
|---------------------------------------------------------------------------------------------|------------|
| <b>Figure S29.</b> $^{13}\text{C}$ NMR spectrum of compound <b>7s</b>                       | <b>S34</b> |
| <b>Figure S30.</b> $^1\text{H}$ NMR spectrum of compound <b>7t</b>                          | <b>S35</b> |
| <b>Figure S31.</b> $^1\text{H}$ NMR spectrum of compound <b>7t</b> ( $\text{D}_2\text{O}$ ) | <b>S36</b> |
| <b>Figure S32.</b> $^{13}\text{C}$ NMR spectrum of compound <b>7t</b>                       | <b>S37</b> |
| <b>2 HRMS spectra of final compounds</b>                                                    | <b>S38</b> |
| <b>Figure S33.</b> HRMS spectrum of compound <b>7a.</b>                                     | <b>S38</b> |
| <b>Figure S34.</b> HRMS spectrum of compound <b>7a</b>                                      | <b>S39</b> |
| <b>Figure S35.</b> HRMS spectrum of compound <b>7b.</b>                                     | <b>S40</b> |
| <b>Figure S36.</b> HRMS spectrum of compound <b>7c.</b>                                     | <b>S41</b> |
| <b>Figure S37.</b> HRMS spectrum of compound <b>7c</b>                                      | <b>S42</b> |
| <b>Figure S38.</b> HRMS spectrum of compound <b>7c</b>                                      | <b>S43</b> |
| <b>Figure S39.</b> HRMS spectrum of compound <b>7d</b>                                      | <b>S44</b> |
| <b>Figure S40.</b> HRMS spectrum of compound <b>7d</b>                                      | <b>S45</b> |
| <b>Figure S41.</b> HRMS spectrum of compound <b>7d</b>                                      | <b>S46</b> |
| <b>Figure S42.</b> HRMS spectrum of compound <b>7e</b>                                      | <b>S47</b> |
| <b>Figure S43.</b> HRMS spectrum of compound <b>7e</b>                                      | <b>S48</b> |
| <b>Figure S44.</b> HRMS spectrum of compound <b>7e</b>                                      | <b>S49</b> |
| <b>Figure S45.</b> HRMS spectrum of compound <b>7f</b>                                      | <b>S50</b> |
| <b>Figure S46.</b> HRMS spectrum of compound <b>7f</b>                                      | <b>S51</b> |
| <b>Figure S47.</b> HRMS spectrum of compound <b>7g</b>                                      | <b>S52</b> |
| <b>Figure S48.</b> HRMS spectrum of compound <b>7g</b>                                      | <b>S53</b> |
| <b>Figure S49.</b> HRMS spectrum of compound <b>7h</b>                                      | <b>S54</b> |
| <b>Figure S50.</b> HRMS spectrum of compound <b>7i</b>                                      | <b>S55</b> |
| <b>Figure S51.</b> HRMS spectrum of compound <b>7i</b>                                      | <b>S56</b> |
| <b>Figure S52.</b> HRMS spectrum of compound <b>7i</b>                                      | <b>S57</b> |
| <b>Figure S53.</b> HRMS spectrum of compound <b>7k</b>                                      | <b>S58</b> |
| <b>Figure S54.</b> HRMS spectrum of compound <b>7k</b>                                      | <b>S59</b> |
| <b>Figure S55.</b> HRMS spectrum of compound <b>7l</b>                                      | <b>S60</b> |
| <b>Figure S56.</b> HRMS spectrum of compound <b>7l</b>                                      | <b>S61</b> |
| <b>Figure S57.</b> HRMS spectrum of compound <b>7m</b>                                      | <b>S62</b> |

|          |                                                            |            |
|----------|------------------------------------------------------------|------------|
|          | <b>Figure S58.</b> HRMS spectrum of compound <b>7m</b>     | <b>S63</b> |
|          | <b>Figure S59.</b> HRMS spectrum of compound <b>7n</b>     | <b>S64</b> |
|          | <b>Figure S60.</b> HRMS spectrum of compound <b>7n</b>     | <b>S65</b> |
|          | <b>Figure S61.</b> HRMS spectrum of compound <b>7n</b>     | <b>S66</b> |
|          | <b>Figure S62.</b> HRMS spectrum of compound <b>7o</b>     | <b>S67</b> |
|          | <b>Figure S63.</b> HRMS spectrum of compound <b>7o</b>     | <b>S68</b> |
|          | <b>Figure S64.</b> HRMS spectrum of compound <b>7p</b>     | <b>S69</b> |
|          | <b>Figure S65.</b> HRMS spectrum of compound <b>7p</b>     | <b>S70</b> |
|          | <b>Figure S66.</b> HRMS spectrum of compound <b>7q</b>     | <b>S71</b> |
|          | <b>Figure S67.</b> HRMS spectrum of compound <b>7q</b>     | <b>S72</b> |
|          | <b>Figure S68.</b> HRMS spectrum of compound <b>7q</b>     | <b>S73</b> |
|          | <b>Figure S69.</b> HRMS spectrum of compound <b>7r</b>     | <b>S74</b> |
|          | <b>Figure S70.</b> HRMS spectrum of compound <b>7r</b>     | <b>S75</b> |
|          | <b>Figure S71.</b> HRMS spectrum of compound <b>7r</b>     | <b>S76</b> |
|          | <b>Figure S72.</b> HRMS spectrum of compound <b>7s</b>     | <b>S77</b> |
|          | <b>Figure S73.</b> HRMS spectrum of compound <b>7s</b>     | <b>S78</b> |
|          | <b>Figure S74.</b> HRMS spectrum of compound <b>7t</b>     | <b>S79</b> |
| <b>3</b> | <b>HPLC Purity charts</b>                                  | <b>S80</b> |
|          | <b>Figure S76.</b> HPLC chromatogram of compound <b>7a</b> | <b>S80</b> |
|          | <b>Figure S77.</b> HPLC chromatogram of compound <b>7b</b> | <b>S81</b> |
|          | <b>Figure S78.</b> HPLC chromatogram of compound <b>7c</b> | <b>S82</b> |
|          | <b>Figure S79.</b> HPLC chromatogram of compound <b>7d</b> | <b>S83</b> |
|          | <b>Figure S80.</b> HPLC chromatogram of compound <b>7e</b> | <b>S84</b> |
|          | <b>Figure S81.</b> HPLC chromatogram of compound <b>7f</b> | <b>S85</b> |
|          | <b>Figure S82.</b> HPLC chromatogram of compound <b>7g</b> | <b>S86</b> |
|          | <b>Figure S83.</b> HPLC chromatogram of compound <b>7h</b> | <b>S87</b> |
|          | <b>Figure S84.</b> HPLC chromatogram of compound <b>7i</b> | <b>S88</b> |
|          | <b>Figure S85.</b> HPLC chromatogram of compound <b>7j</b> | <b>S89</b> |
|          | <b>Figure S86.</b> HPLC chromatogram of compound <b>7k</b> | <b>S90</b> |
|          | <b>Figure S87.</b> HPLC chromatogram of compound <b>7l</b> | <b>S91</b> |

|          |                                                                                                                                                                                             |             |
|----------|---------------------------------------------------------------------------------------------------------------------------------------------------------------------------------------------|-------------|
|          | <b>Figure S88.</b> HPLC chromatogram of compound <b>7n</b>                                                                                                                                  | <b>S92</b>  |
|          | <b>Figure S89.</b> HPLC chromatogram of compound <b>7o</b>                                                                                                                                  | <b>S93</b>  |
|          | <b>Figure S90.</b> HPLC chromatogram of compound <b>7s</b>                                                                                                                                  | <b>S94</b>  |
|          | <b>Figure S91.</b> HPLC chromatogram of compound <b>7t</b>                                                                                                                                  | <b>S95</b>  |
| <b>4</b> | <b>Figure S92.</b> Dose-response curves of the anti-proliferative/cytotoxic effects of the derivative SH7s and the CA reference inhibitor SLC-0111 on human HCT-116 colorectal cancer cells | <b>S96</b>  |
| <b>5</b> | <b>Table S1.</b> Kinase Assay profiling results for compound <b>SH7s</b>                                                                                                                    | <b>S97</b>  |
| <b>6</b> | <b>NCI charts for cellular assay</b>                                                                                                                                                        | <b>S103</b> |
|          | <b>Figure S93.</b> Single dose assay of compound <b>7t</b> a panel of 60 cancer cell lines.                                                                                                 | <b>S103</b> |
|          | <b>Figure S94.</b> Single dose assay of compound <b>7s</b> a panel of 60 cancer cell lines                                                                                                  | <b>S104</b> |
|          | <b>Figure S95.</b> Five dose assay of compound <b>7s</b> a panel of 60 cancer cell lines                                                                                                    | <b>S105</b> |
|          | <b>Figure S96.</b> Five dose assay of compound <b>7s</b> a panel of 60 cancer cell lines                                                                                                    | <b>S106</b> |

**$^1\text{H}$  and  $^{13}\text{C}$  NMR charts of the final compounds**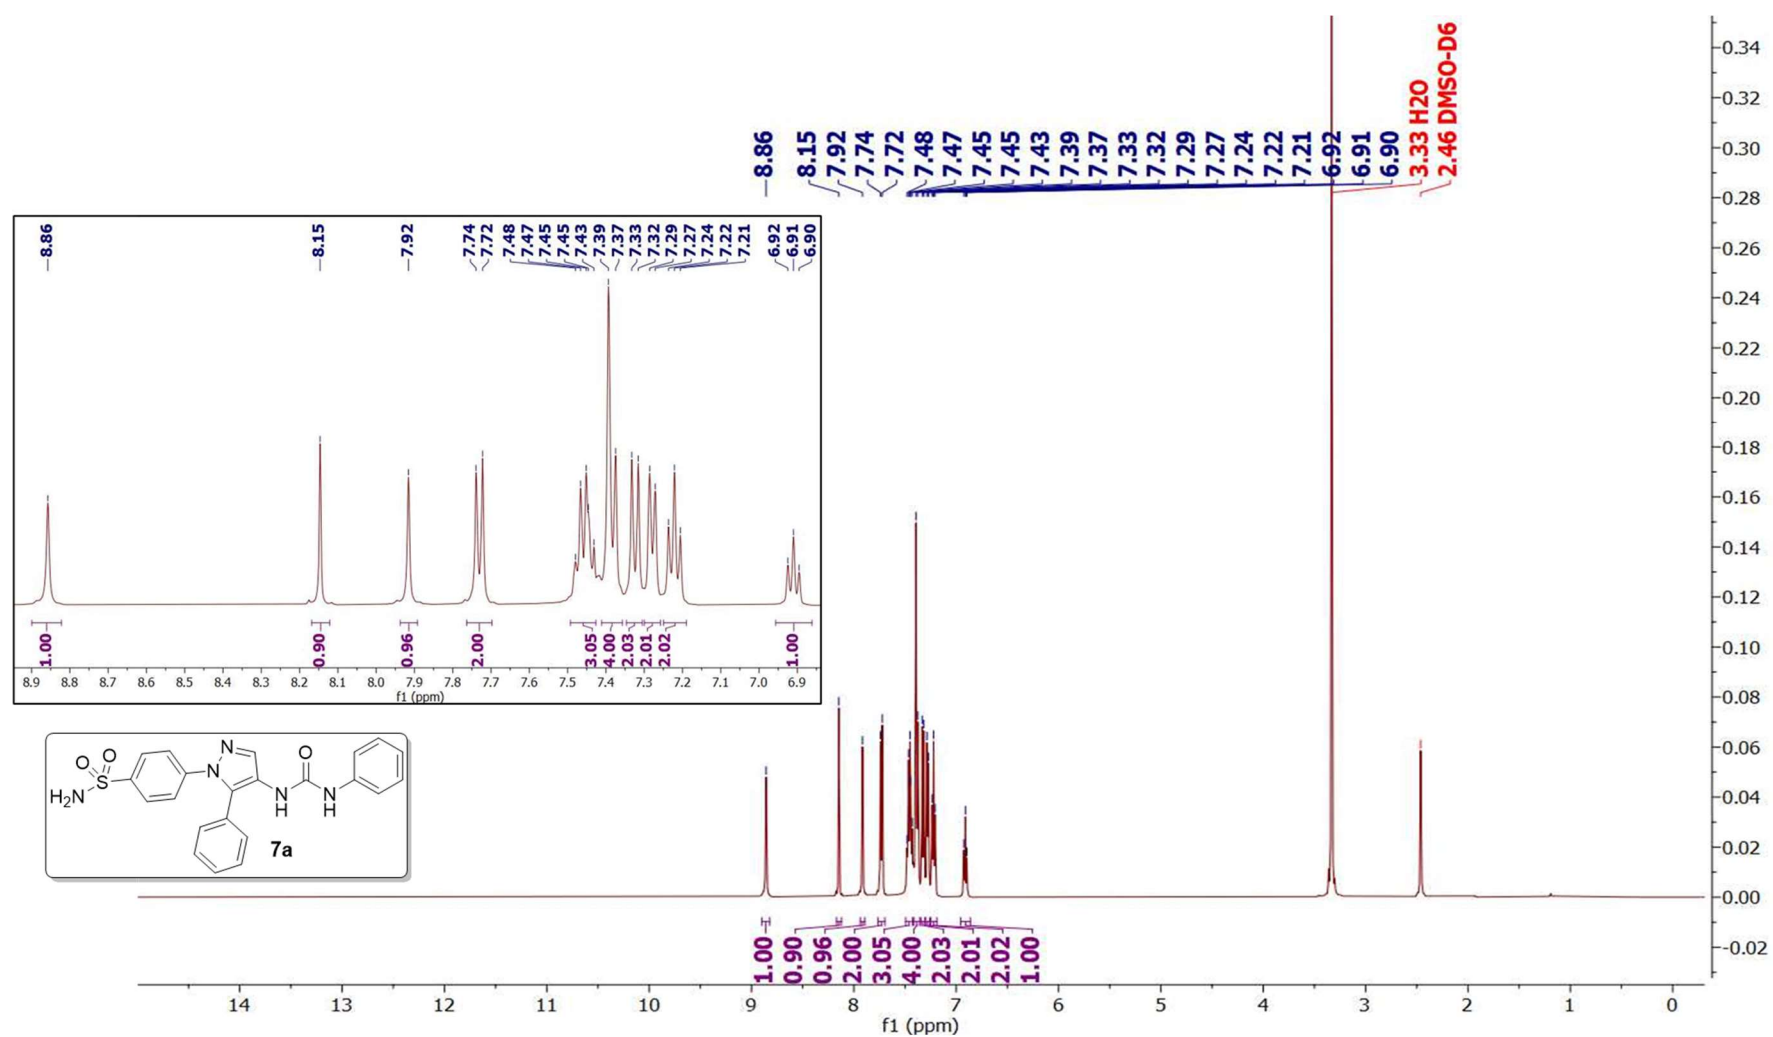**Figure S1.**  $^1\text{H}$  NMR spectrum of compound **7a**.

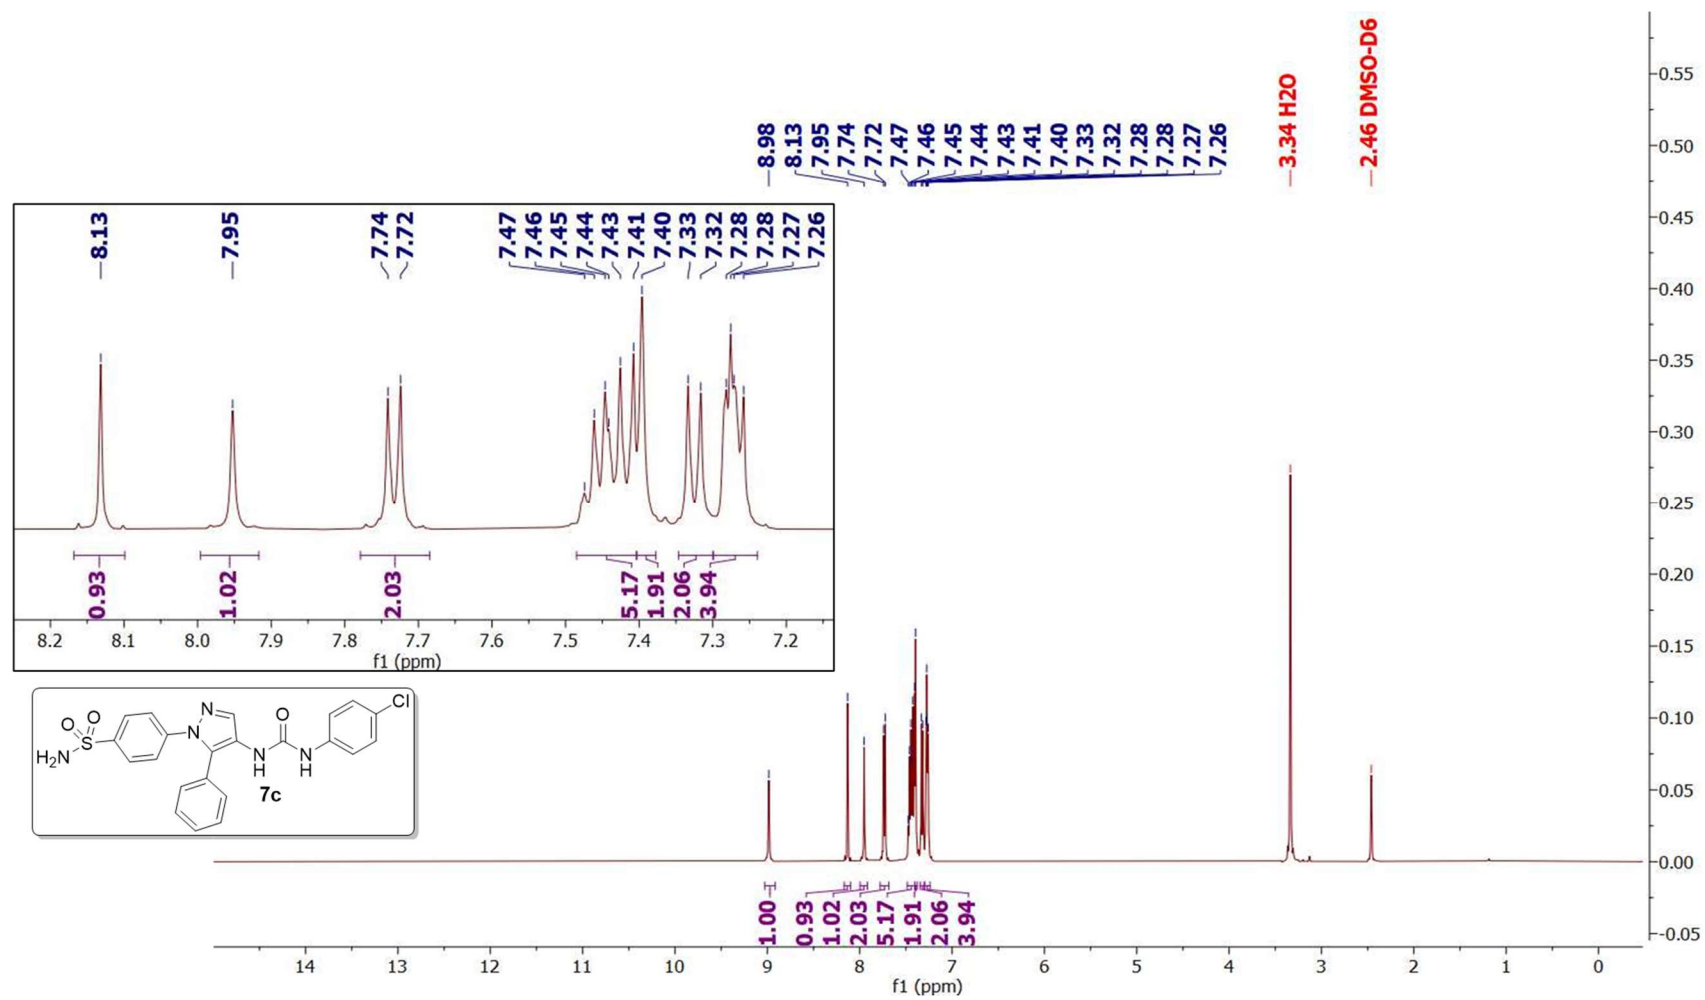

Figure S2.  $^1\text{H}$  NMR spectrum of compound **7c**.

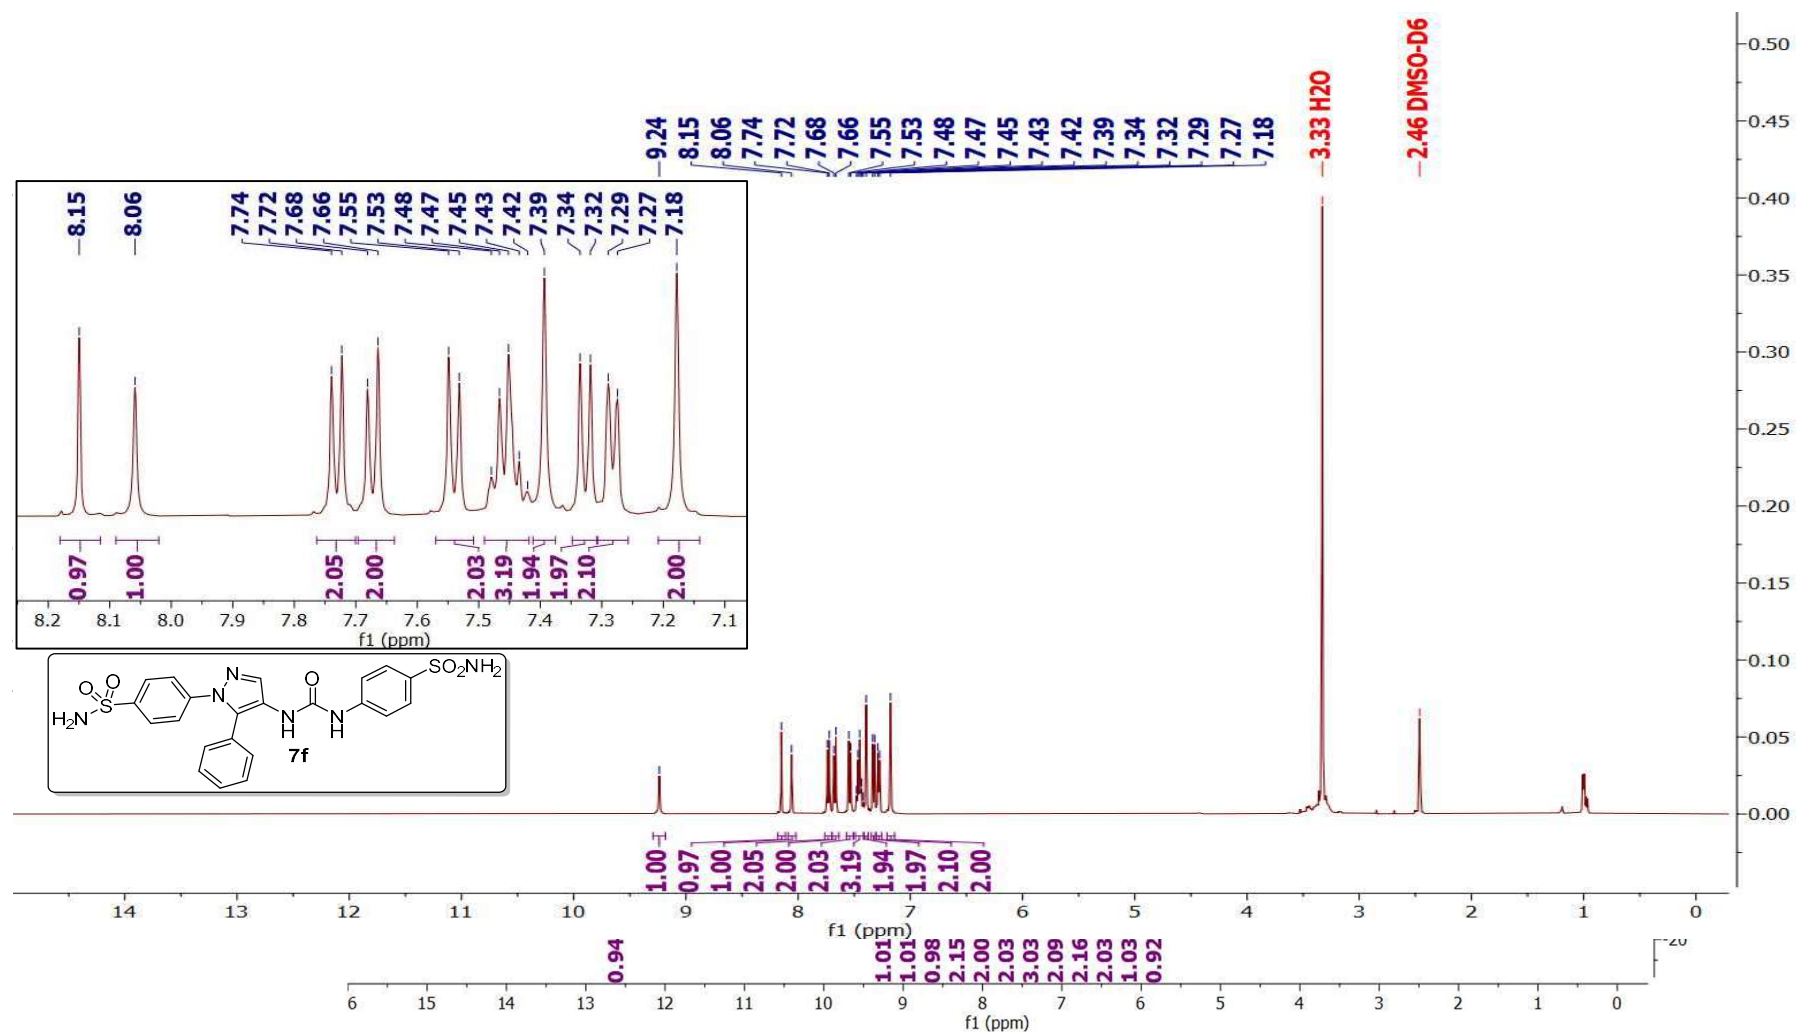Figure S3.  $^1\text{H}$  NMR spectrum of compound **7f**.



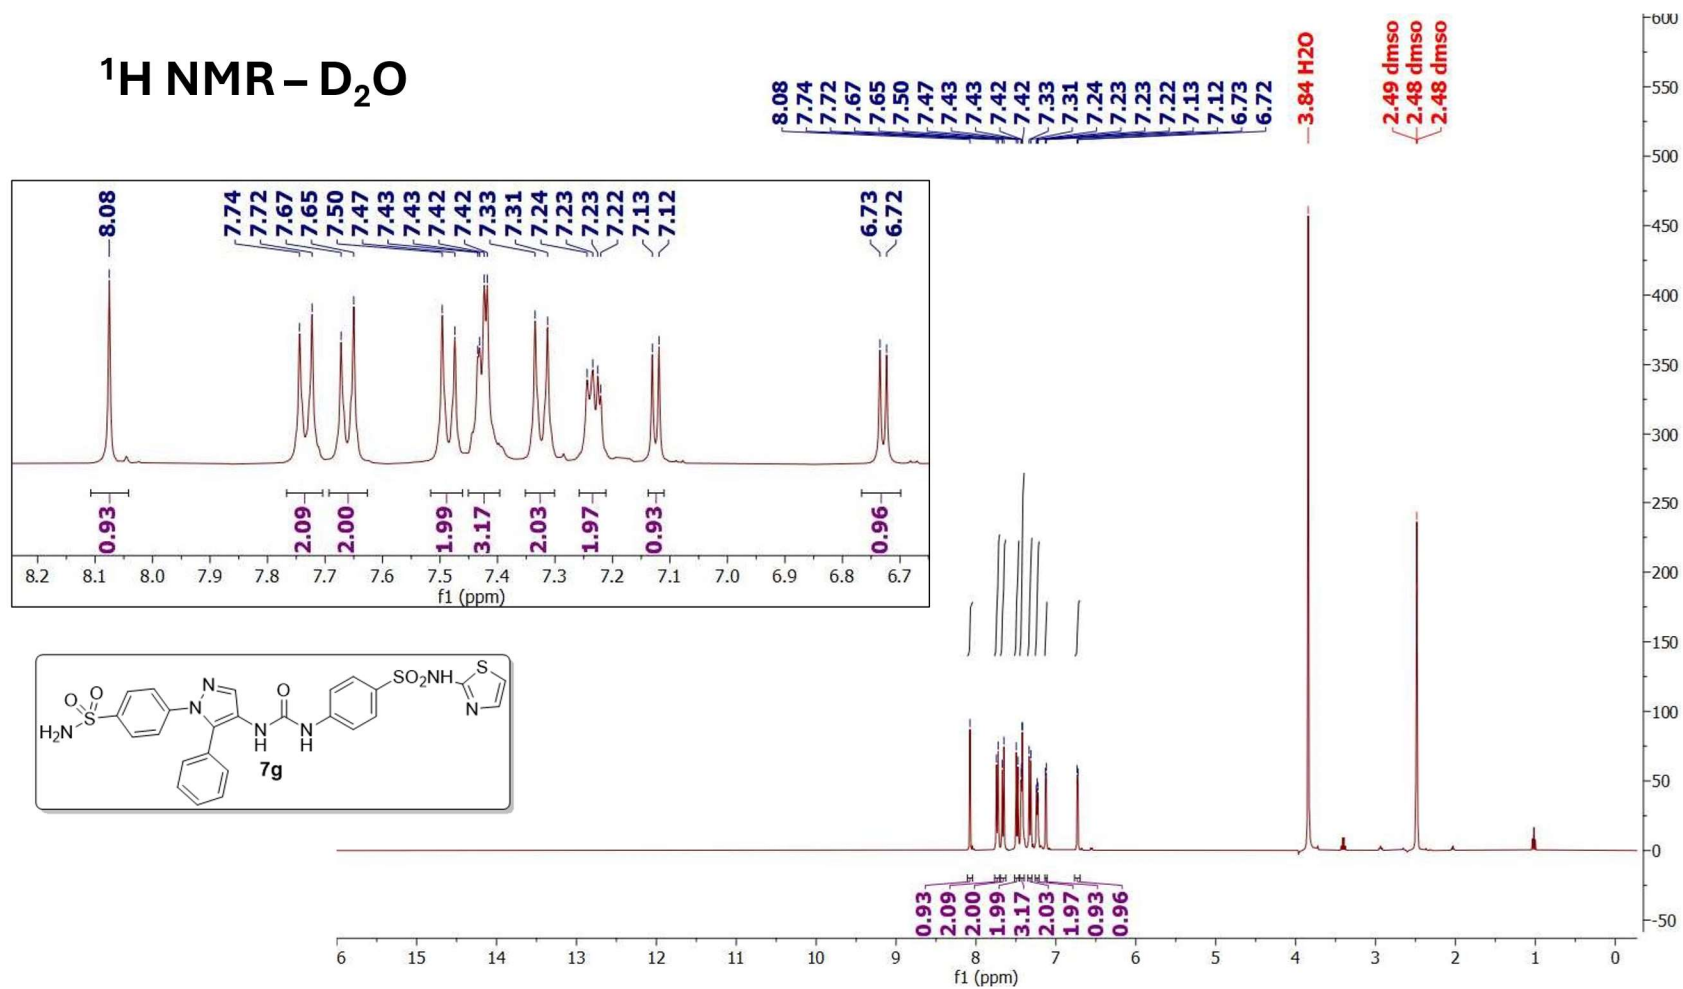

**Figure S4.**  $^1\text{H}$  NMR spectrum of compound **7g** ( $\text{D}_2\text{O}$ ).

$^1\text{H}$  NMR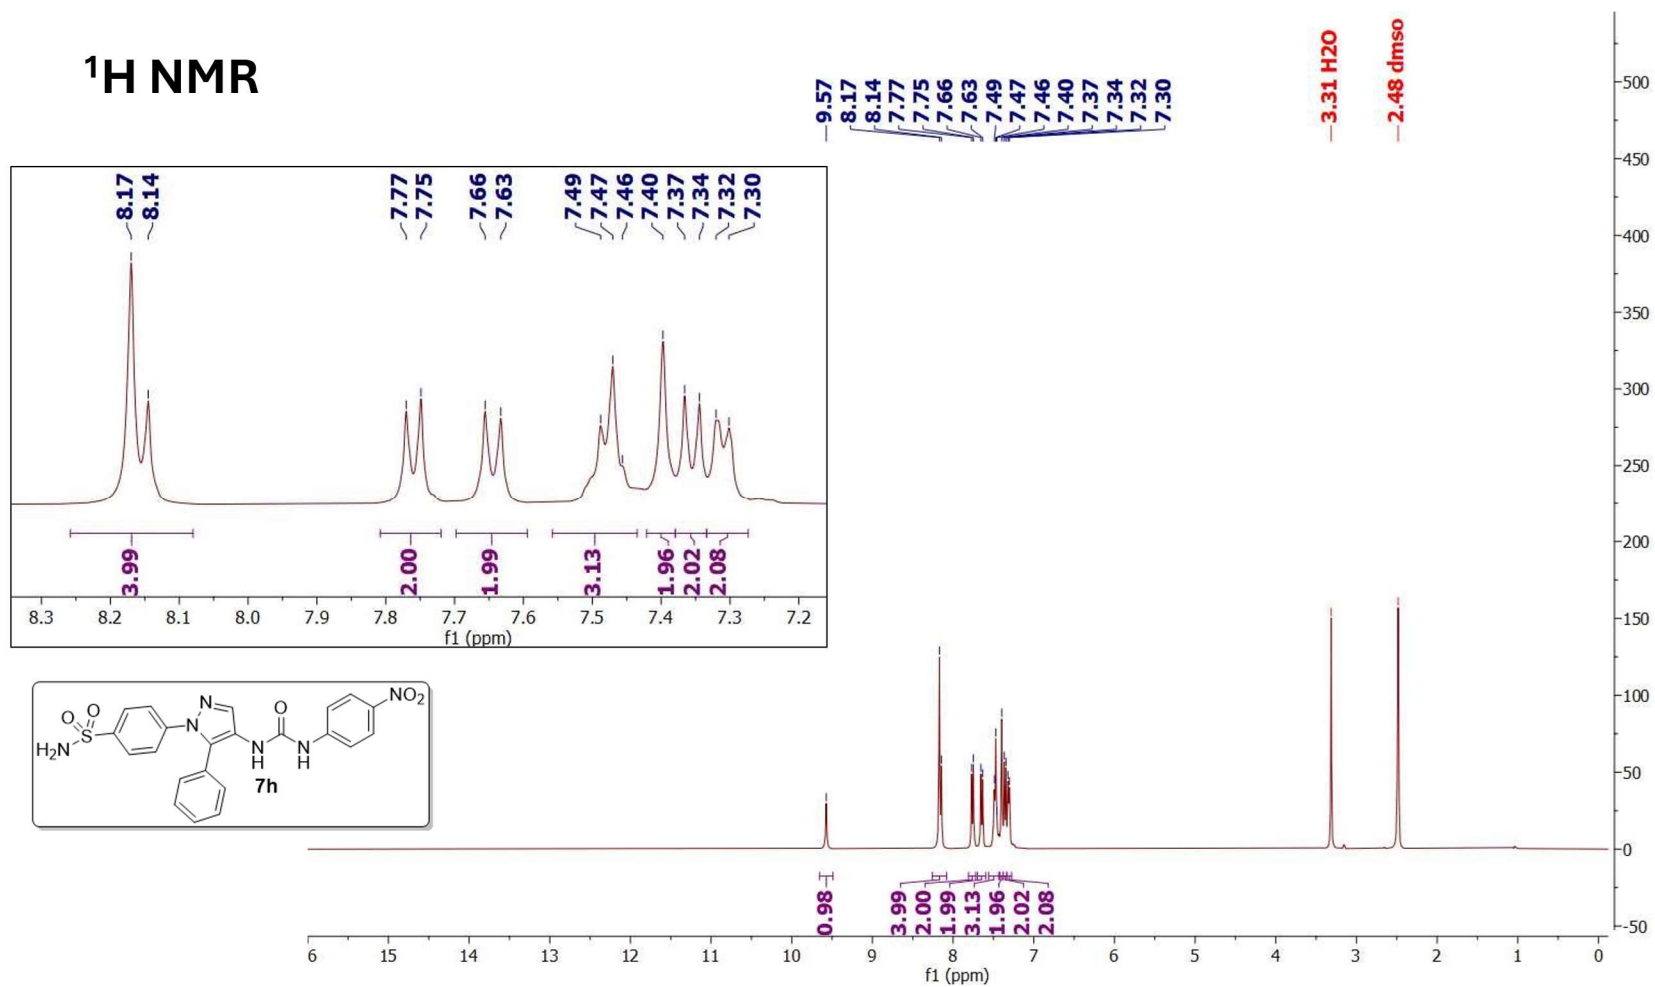Figure S5.  $^1\text{H}$  NMR spectrum of compound **7h**.

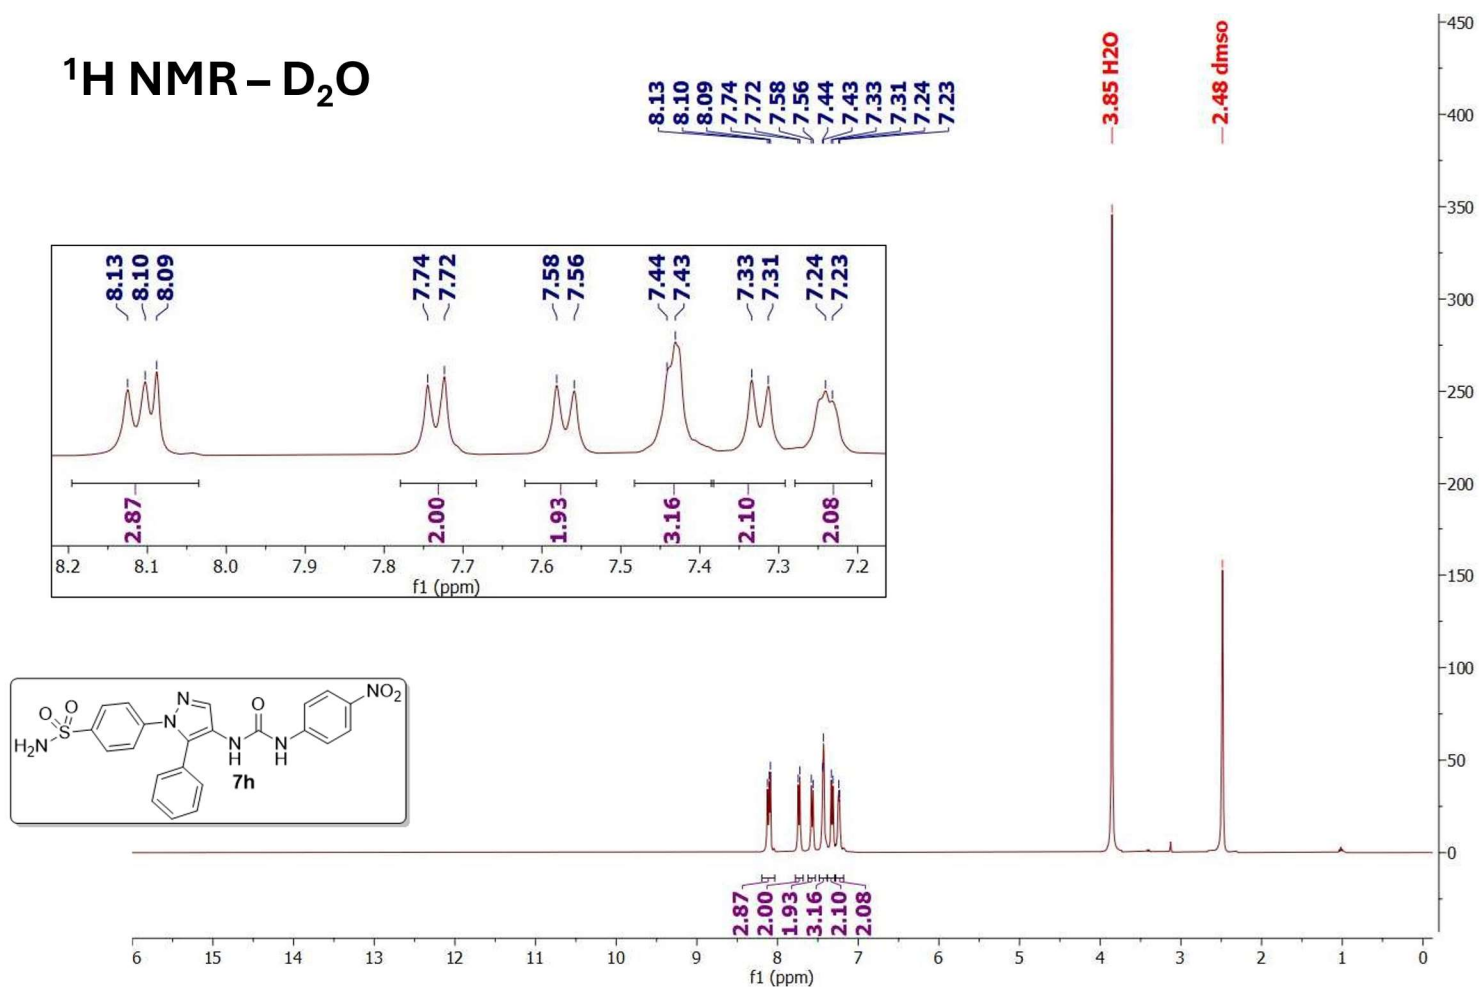

Figure S6.  $^1\text{H NMR}$  spectrum of compound **7h** (D<sub>2</sub>O).

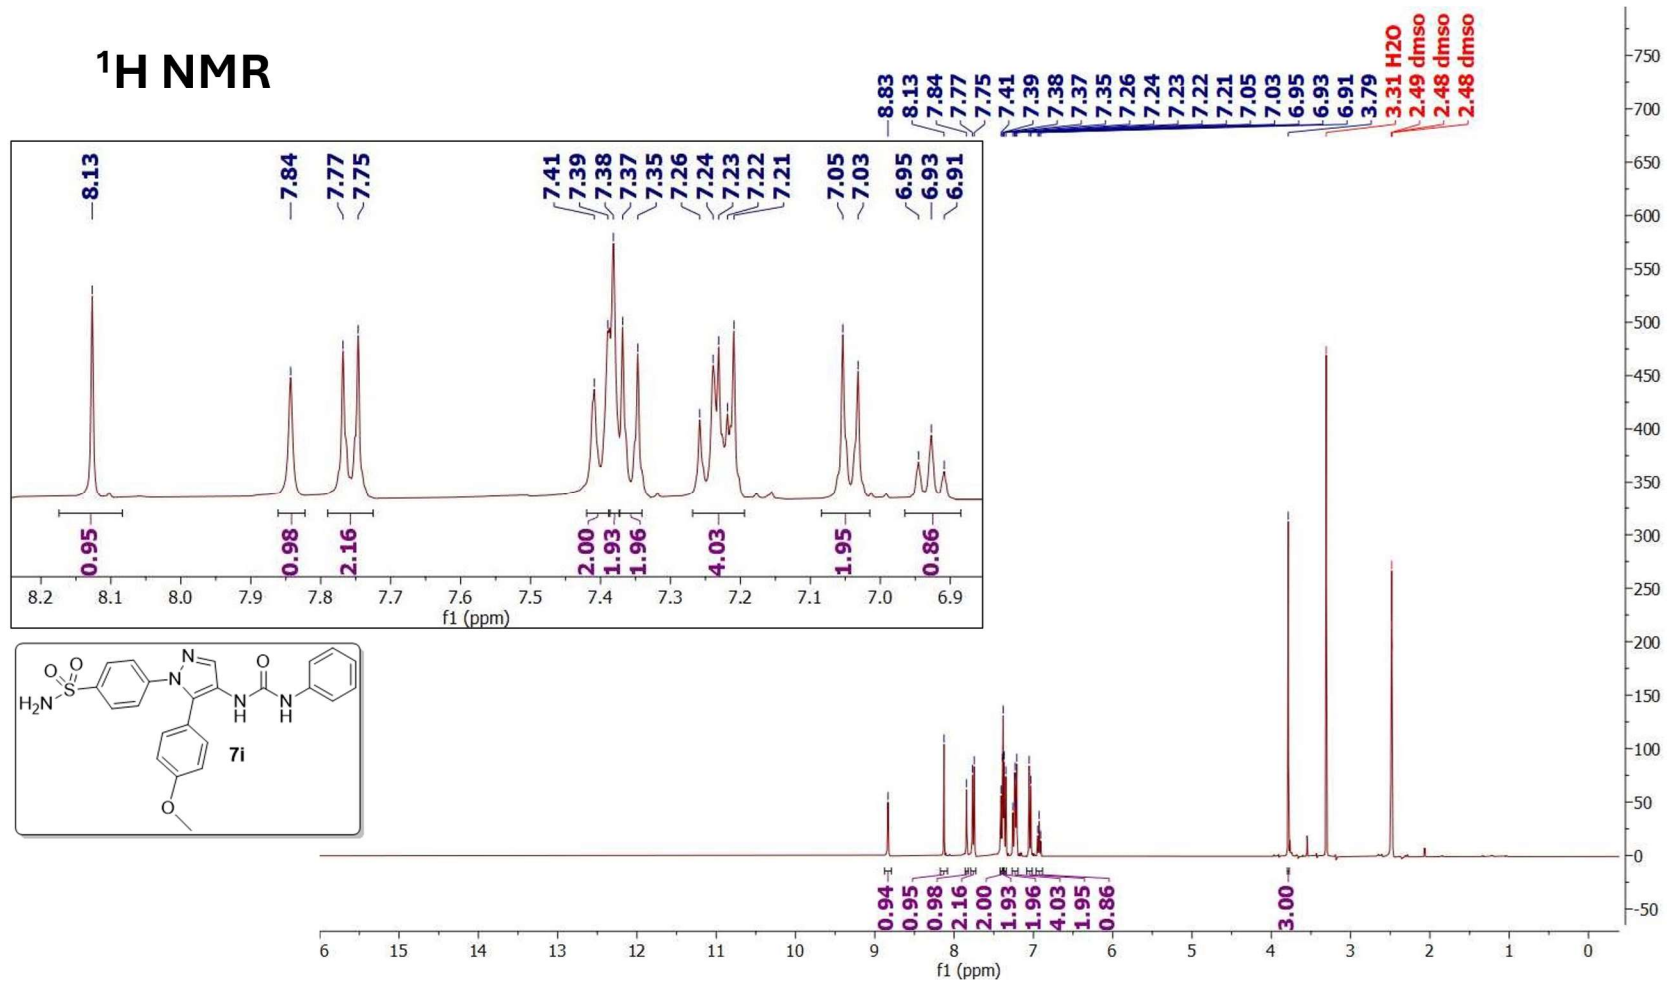Figure S7. <sup>1</sup>H NMR spectrum of compound 7i.

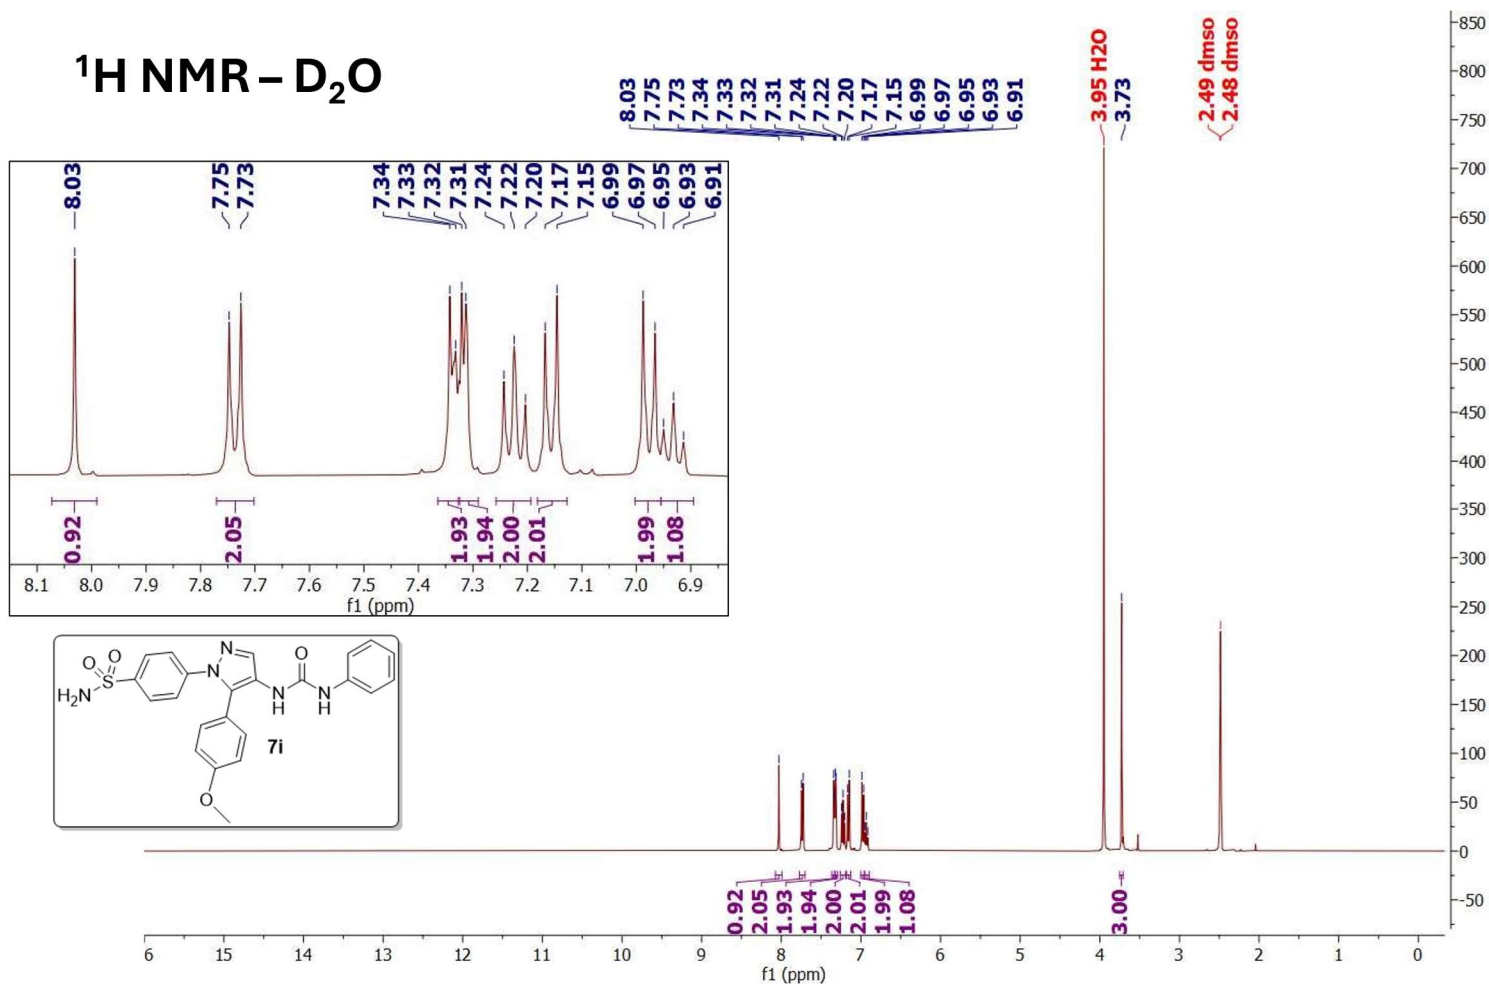

**Figure S8.**  $^1\text{H NMR}$  spectrum of compound **7i** ( $\text{D}_2\text{O}$ ).

$^{13}\text{C}$  NMR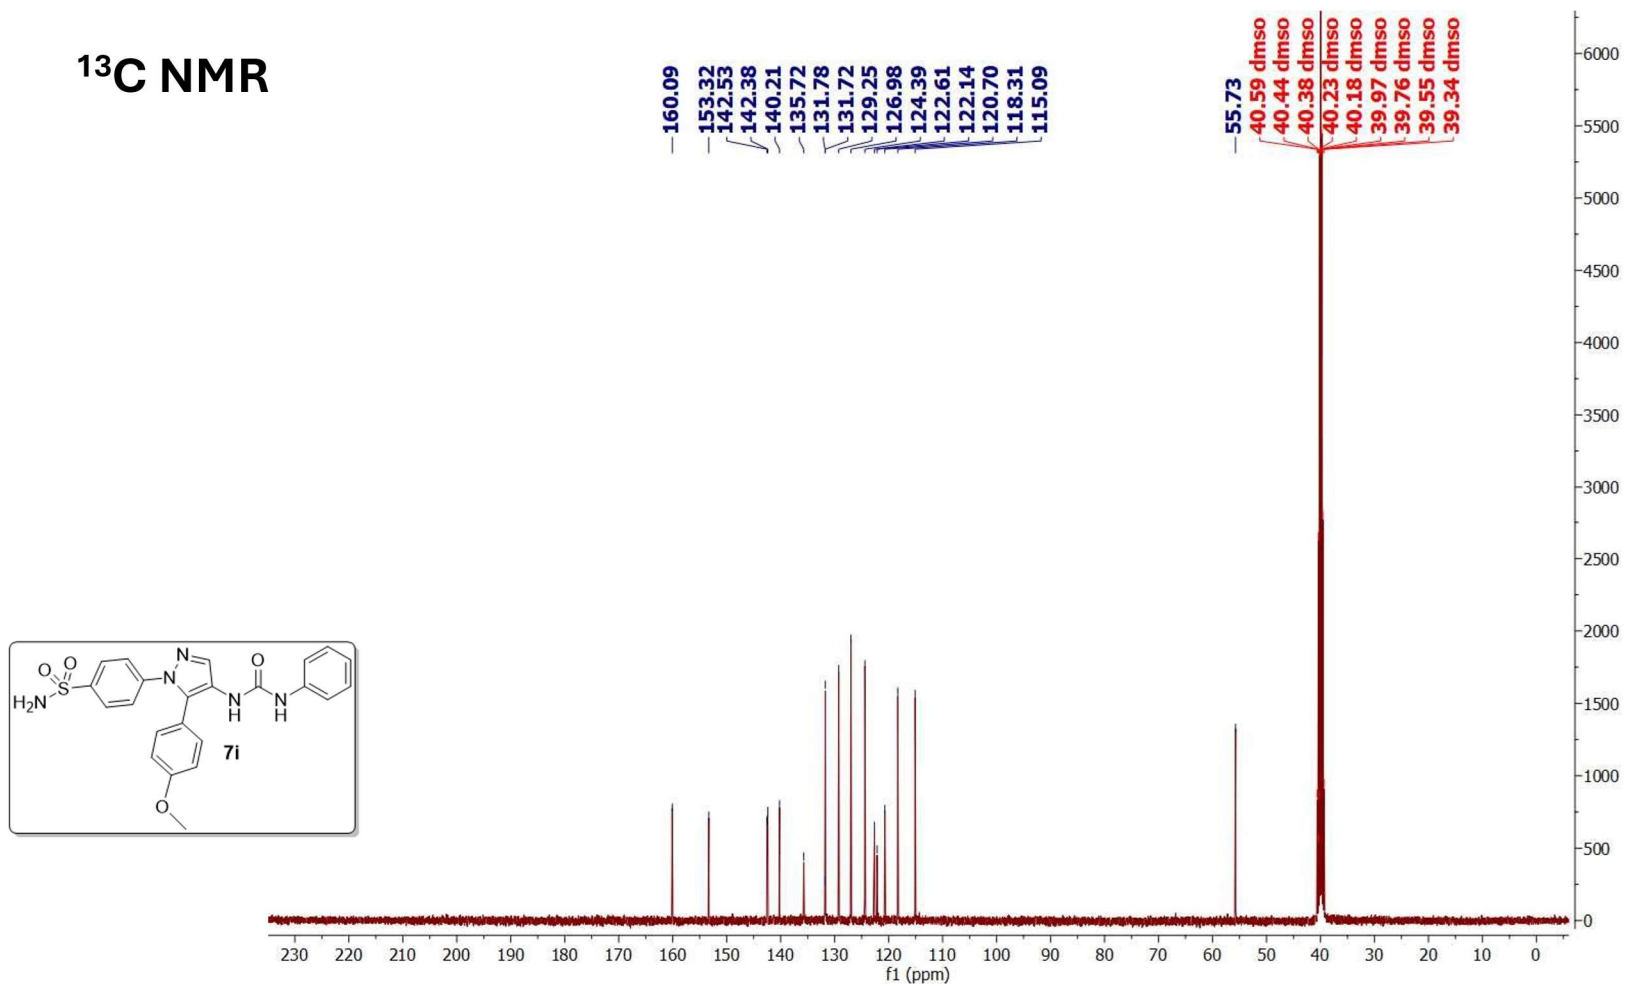Figure S9.  $^{13}\text{C}$  NMR spectrum of compound 7i.

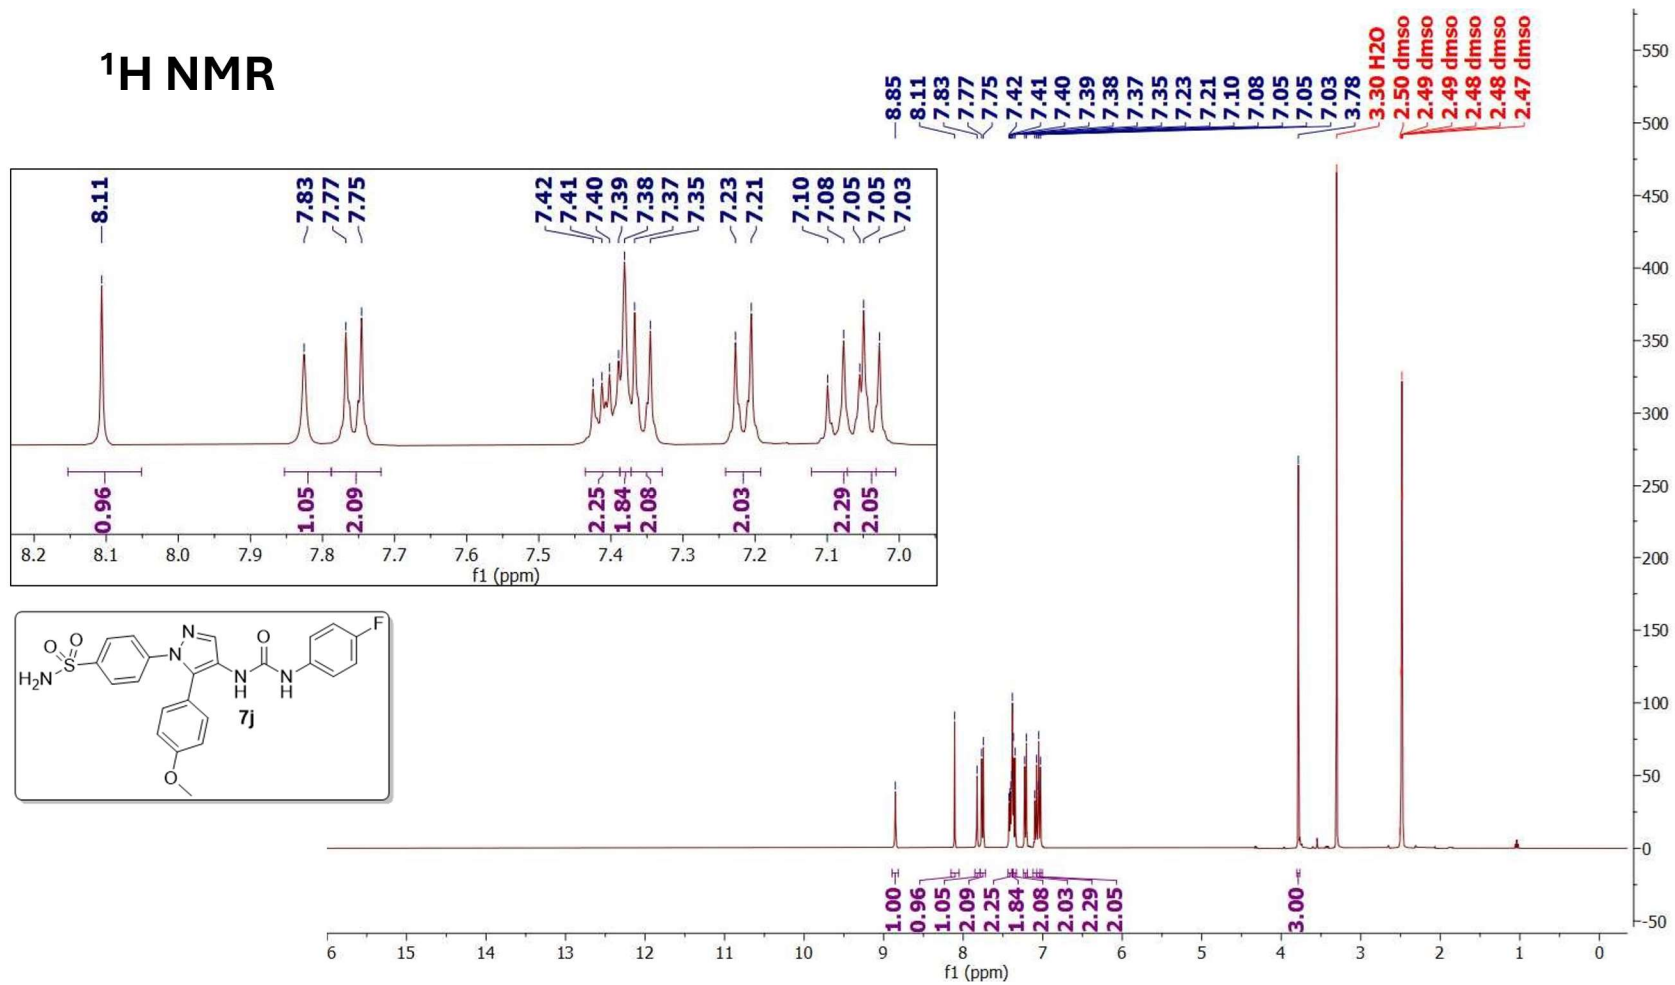Figure S10.  $^1\text{H}$  NMR spectrum of compound **7j**.

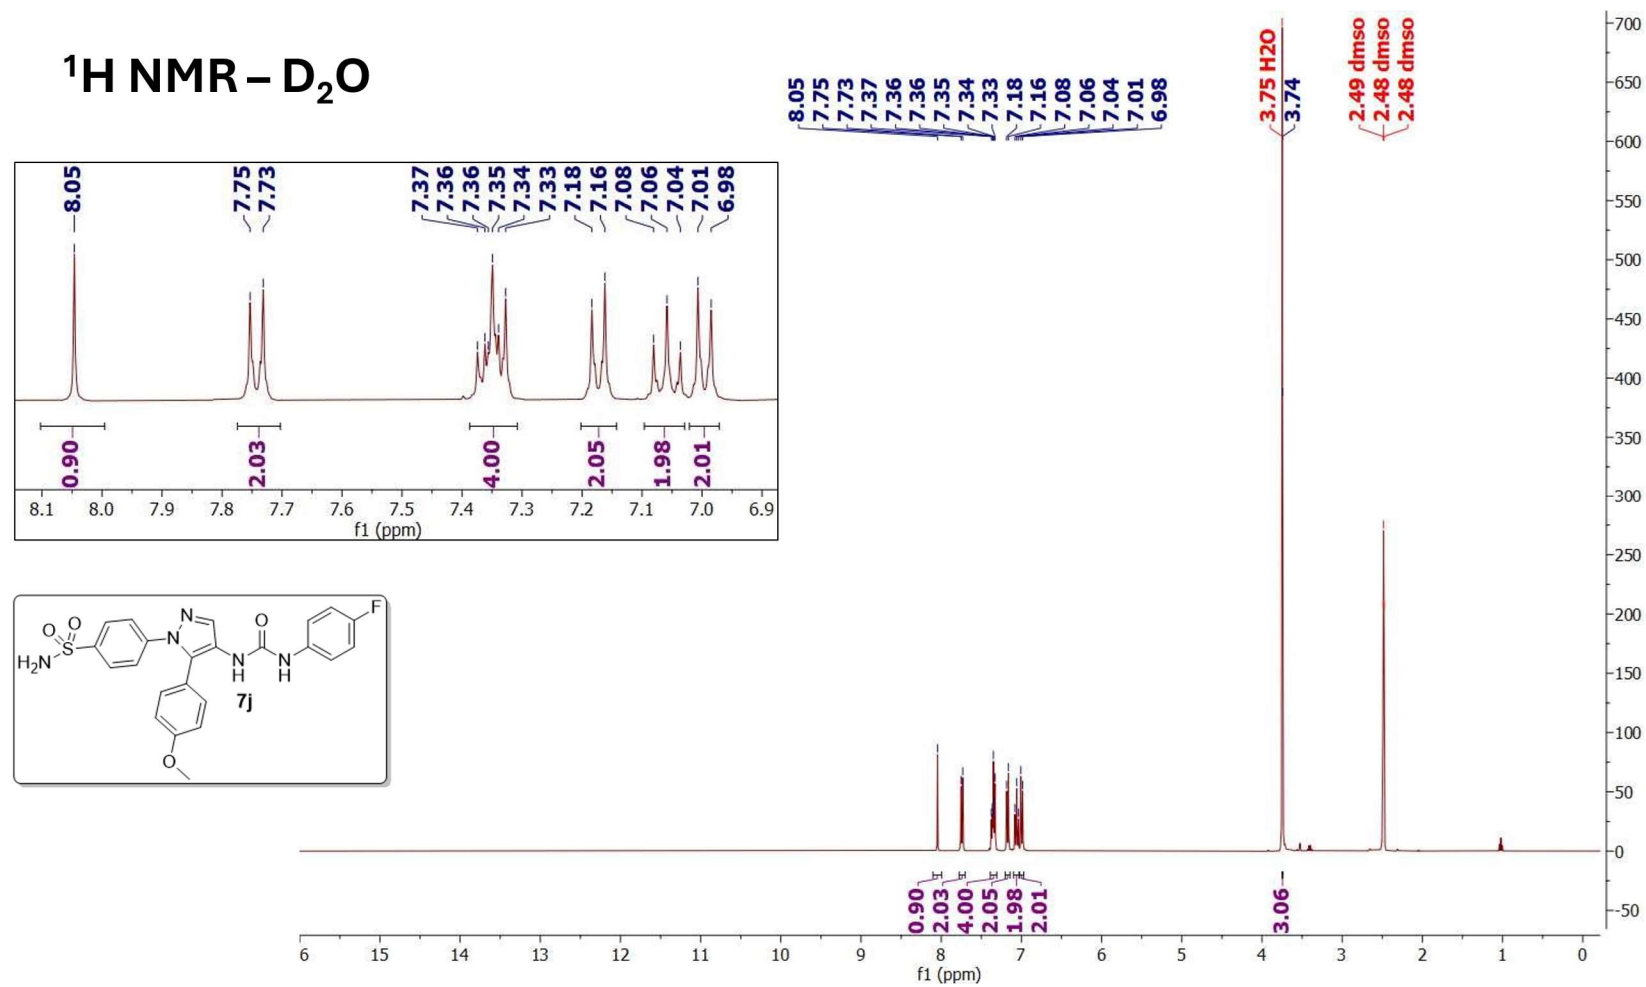

**Figure S11.**  $^1\text{H NMR}$  spectrum of compound **7j** ( $\text{D}_2\text{O}$ ).



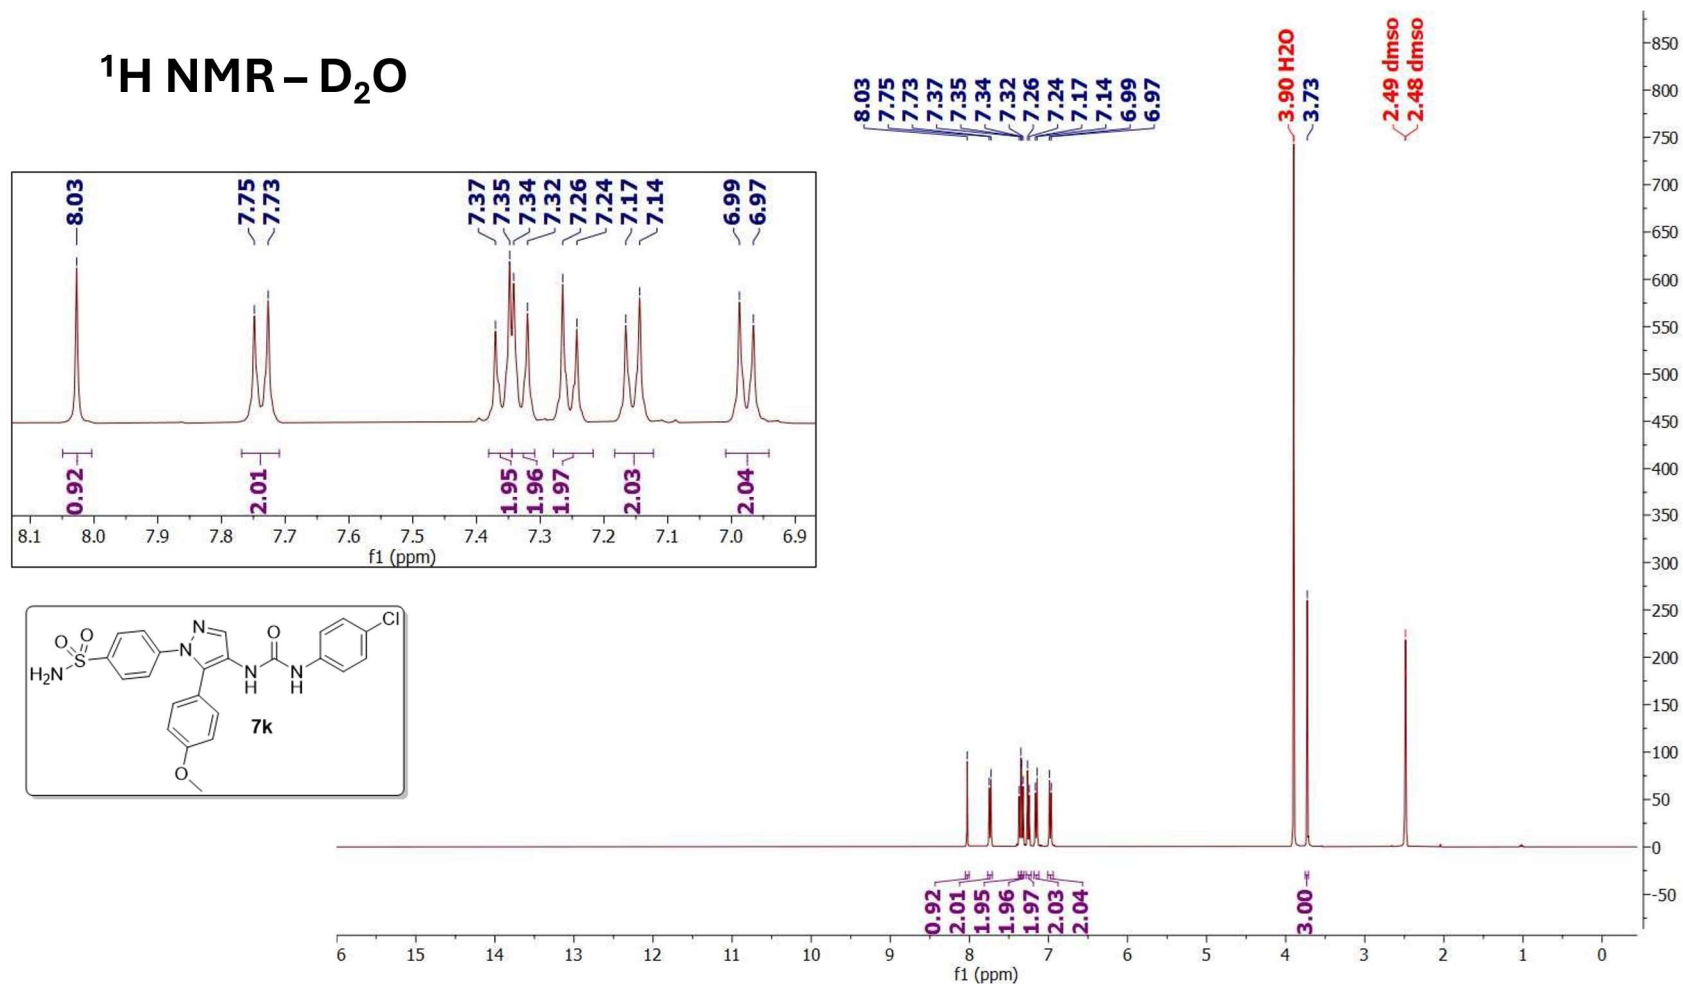

**Figure S12.**  $^1\text{H}$  NMR spectrum of compound **7k** ( $\text{D}_2\text{O}$ ).

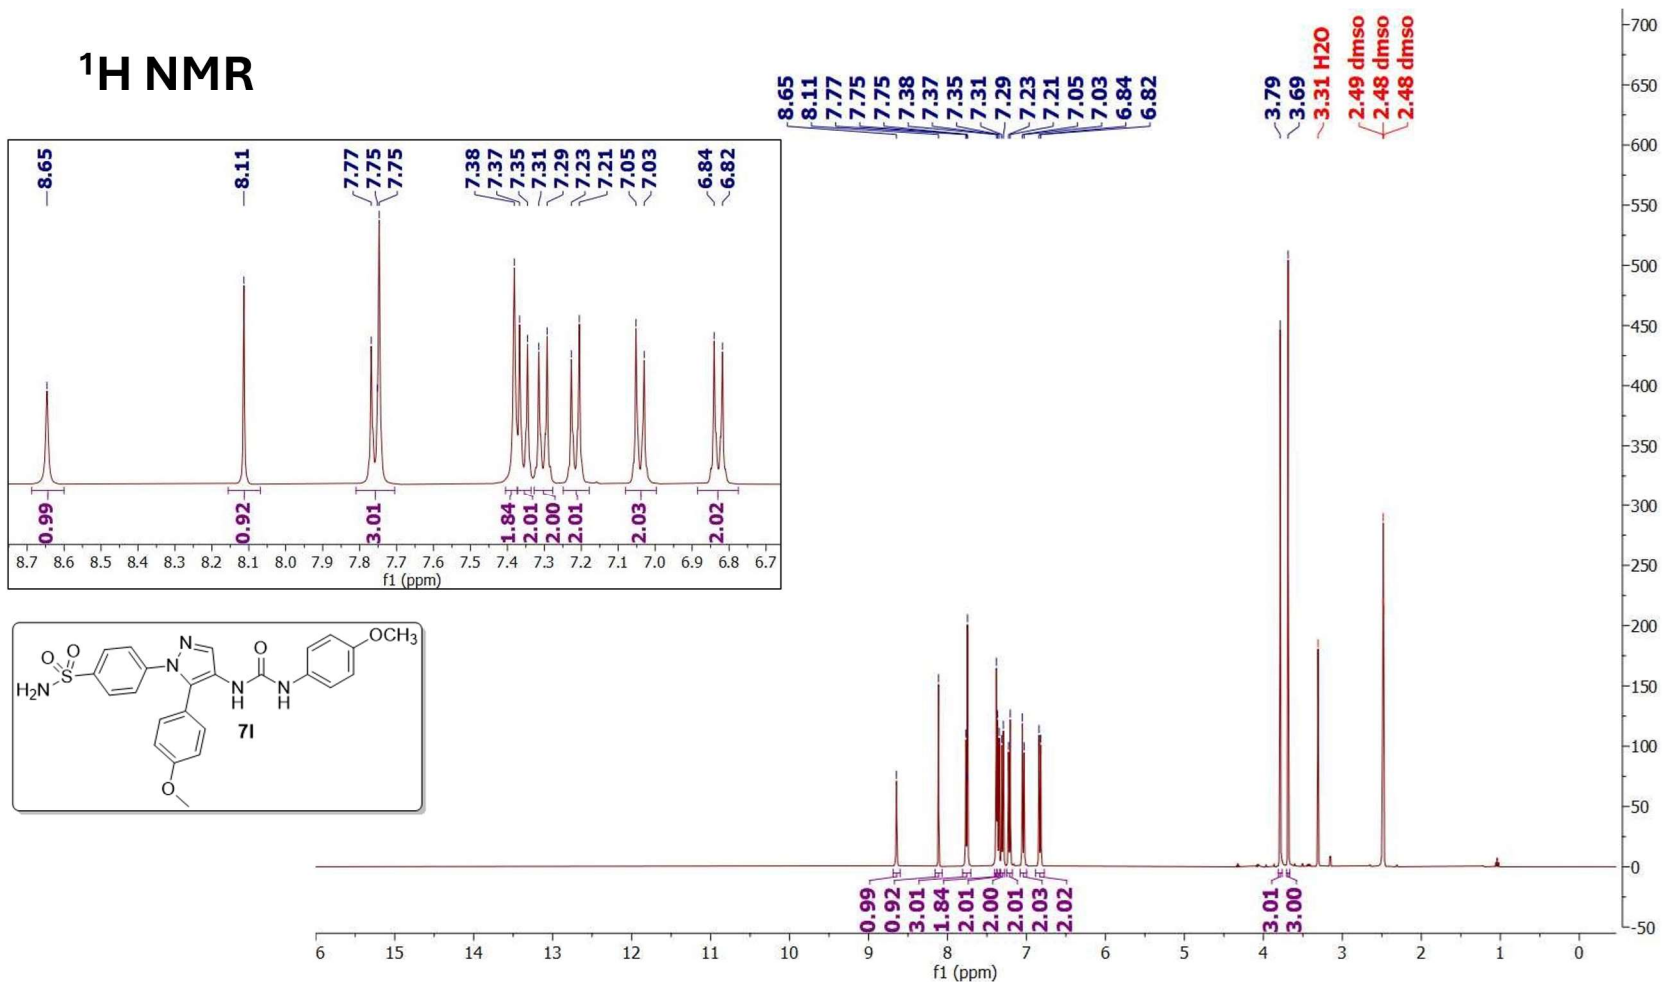

Figure S13.  $^1\text{H}$  NMR spectrum of compound 71.

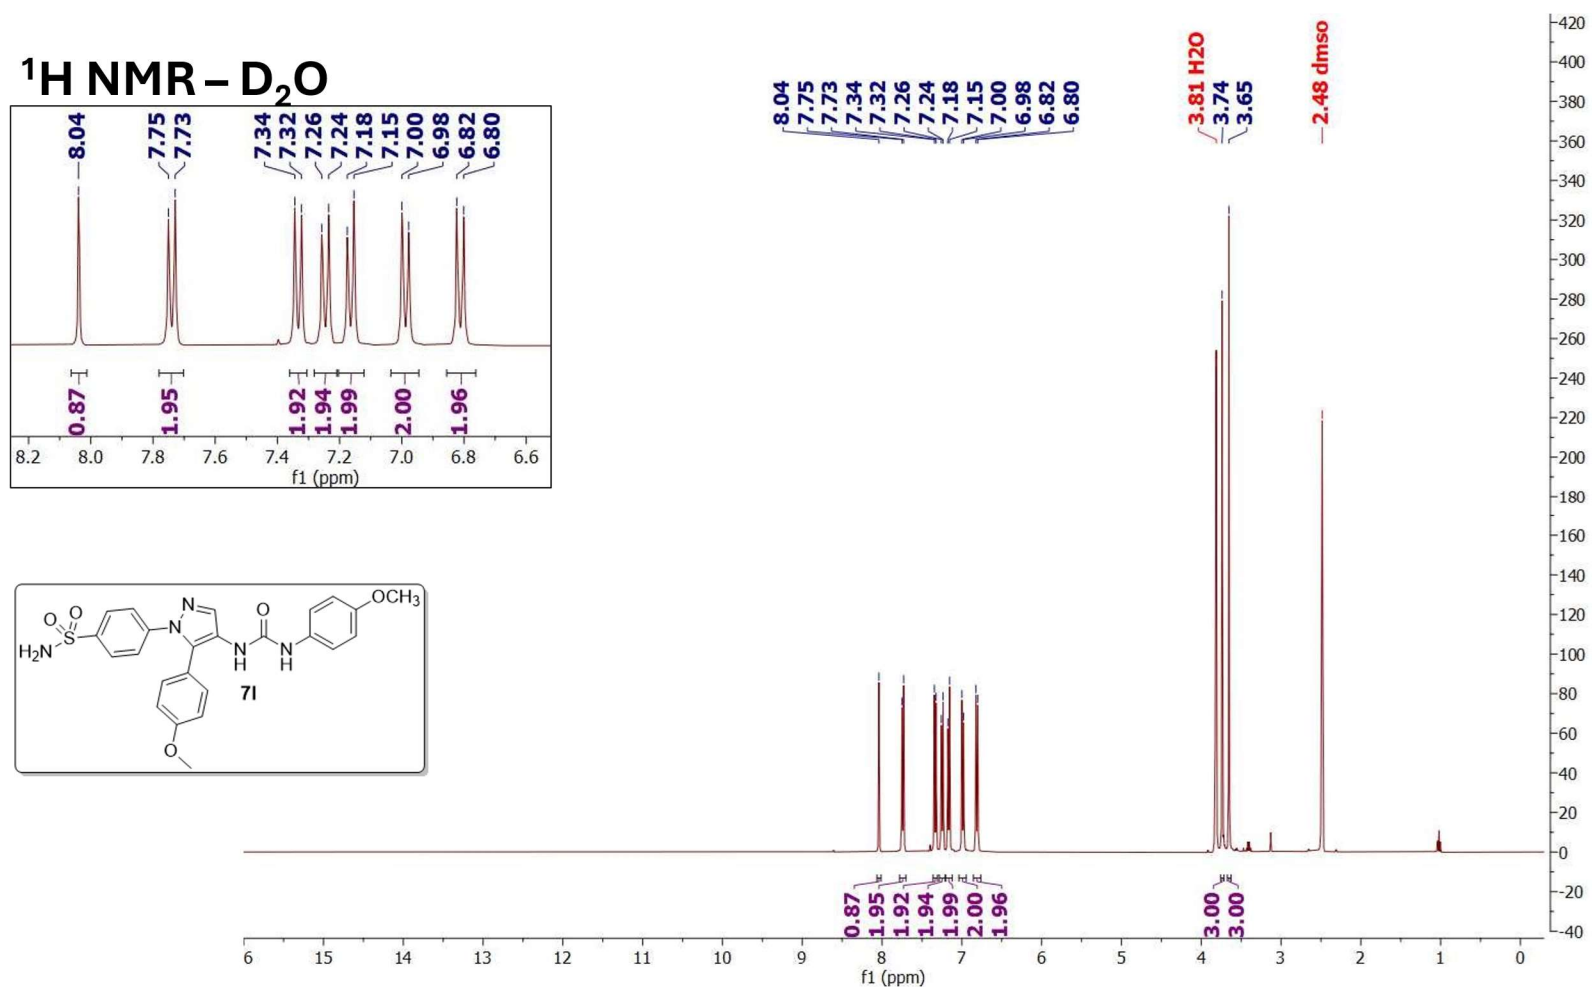

**Figure S14.**  $^1\text{H NMR}$  spectrum of compound **71** (D<sub>2</sub>O).

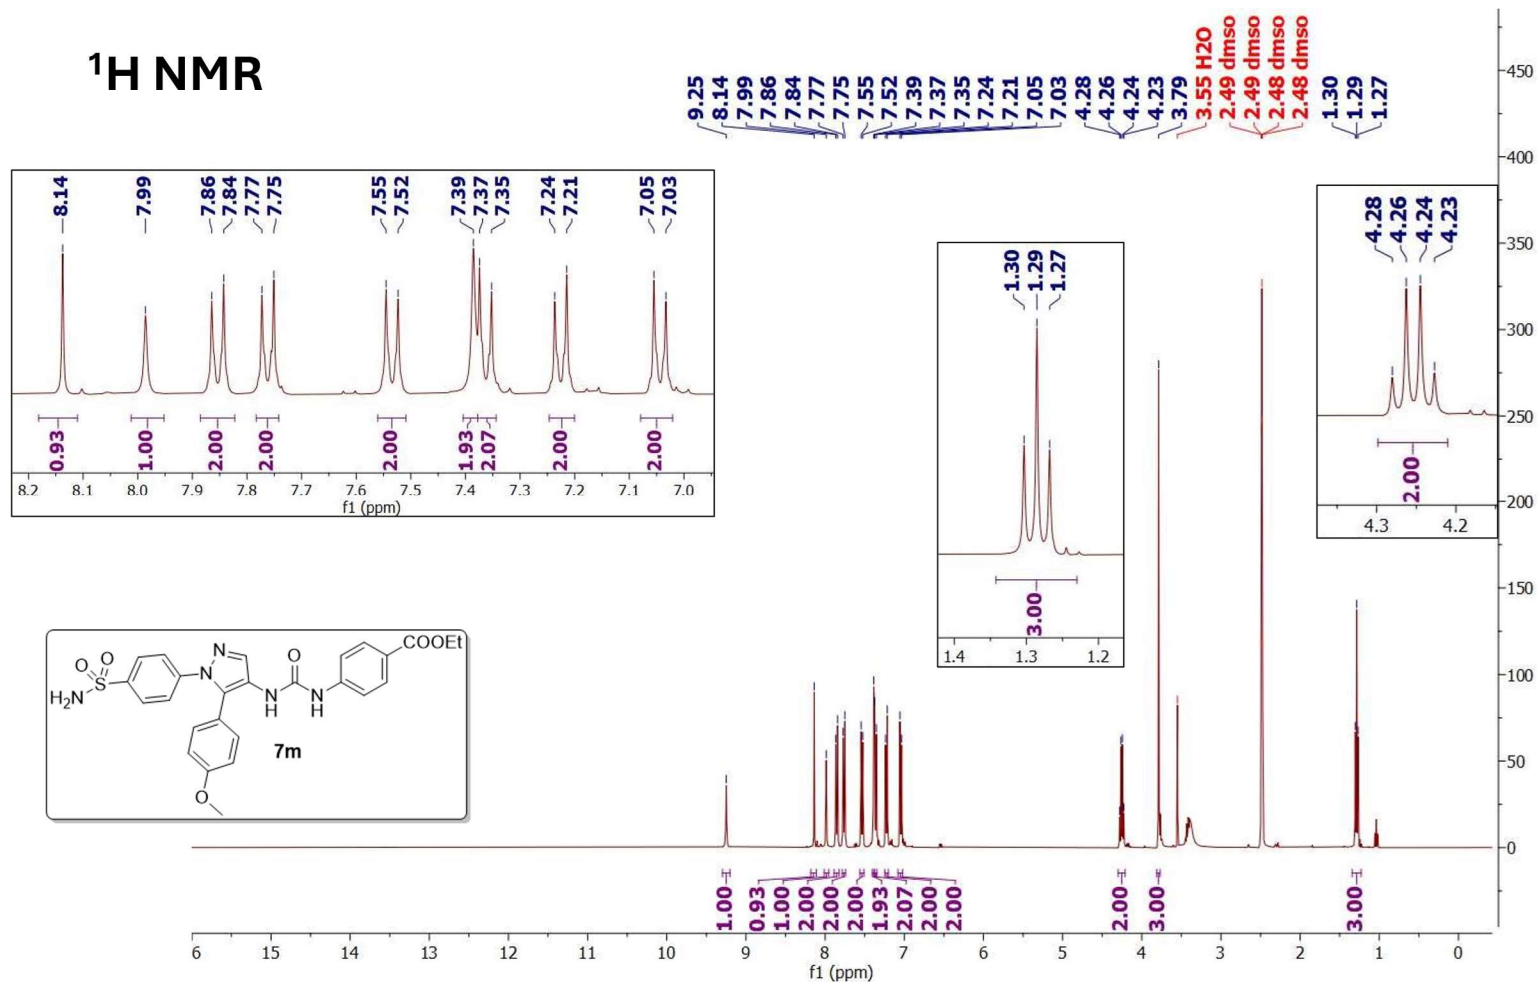Figure S15. <sup>1</sup>H NMR spectrum of compound **7m**.

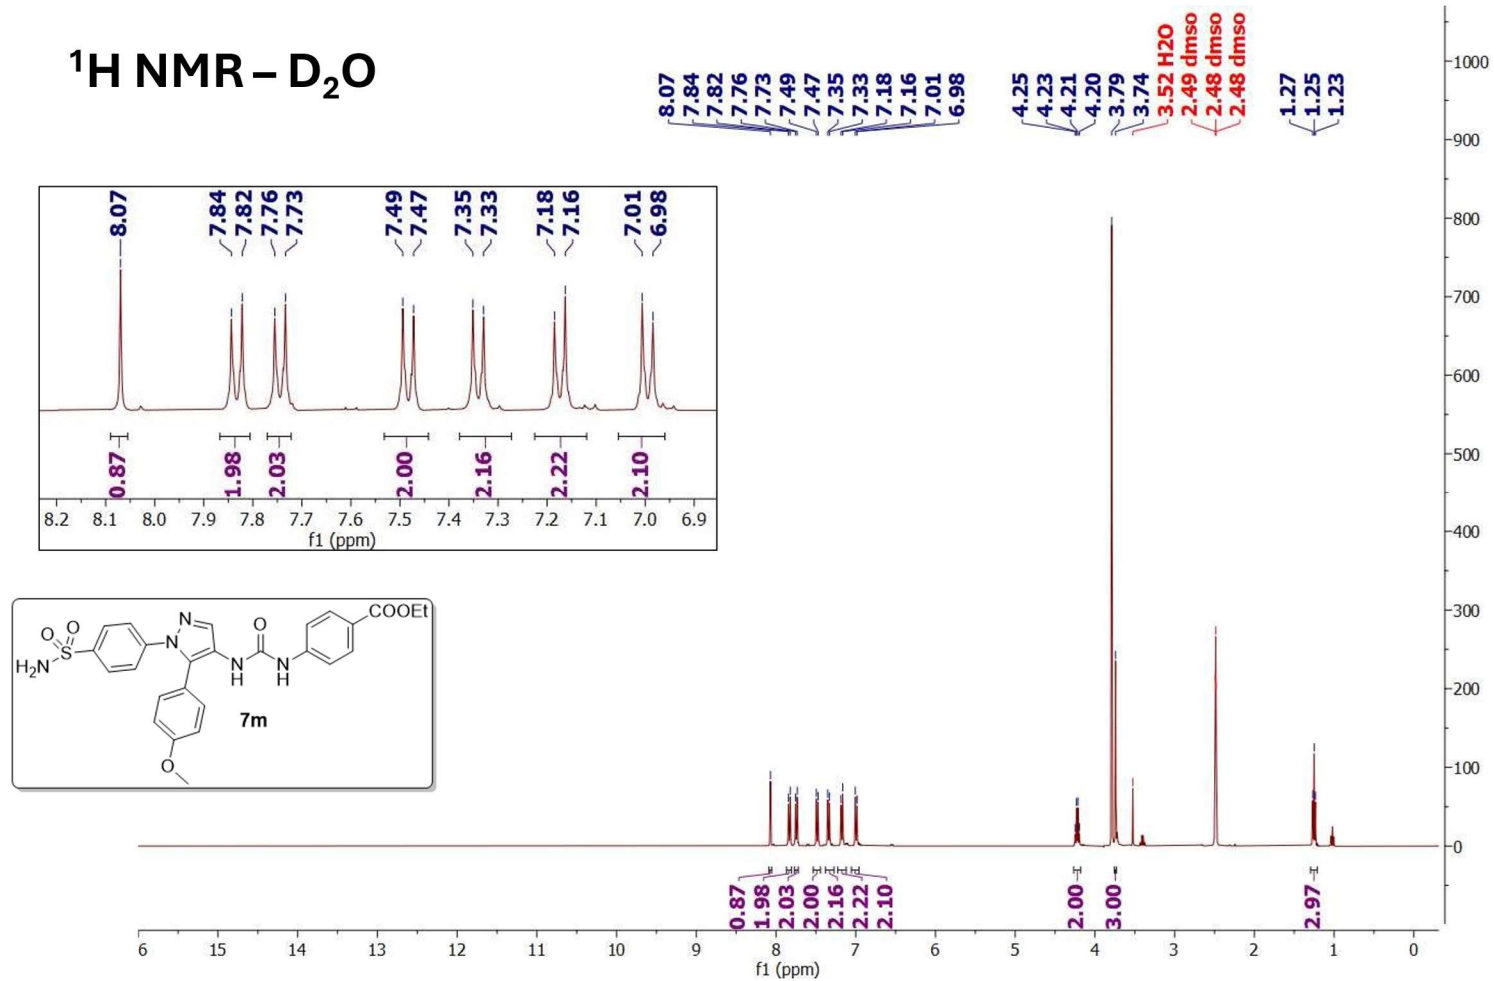

Figure S16.  $^1\text{H NMR}$  spectrum of compound **7m** ( $\text{D}_2\text{O}$ ).

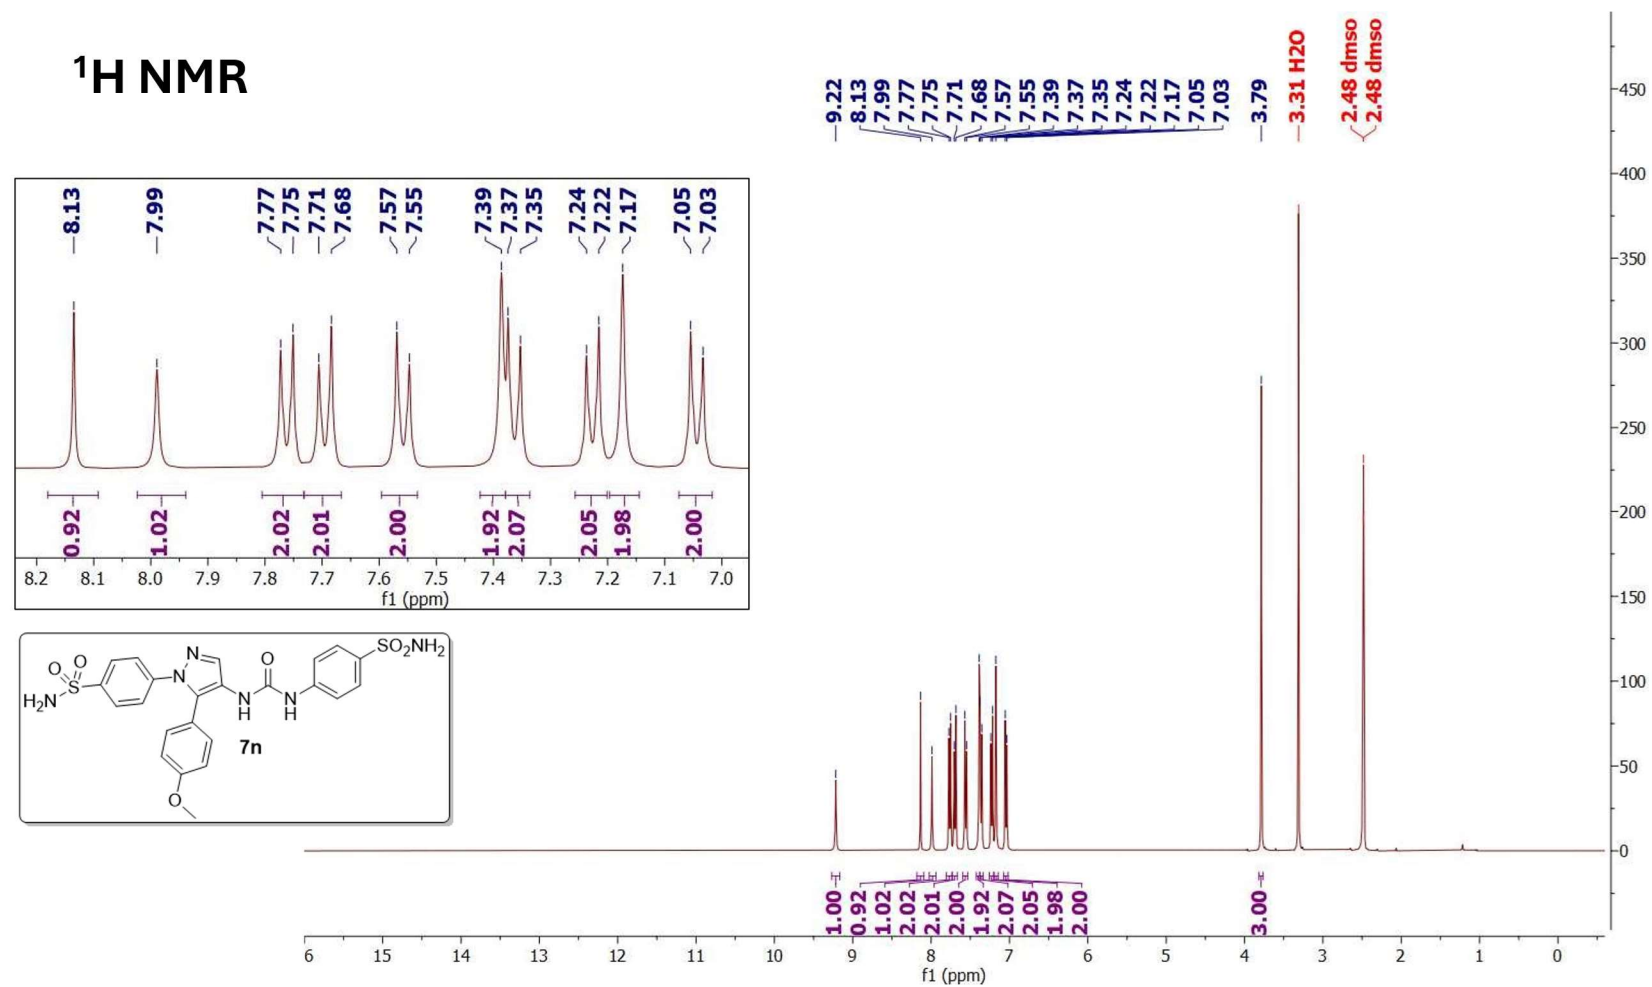Figure S17.  $^1\text{H}$  NMR spectrum of compound **7n**.

$^1\text{H}$  NMR –  $\text{D}_2\text{O}$ 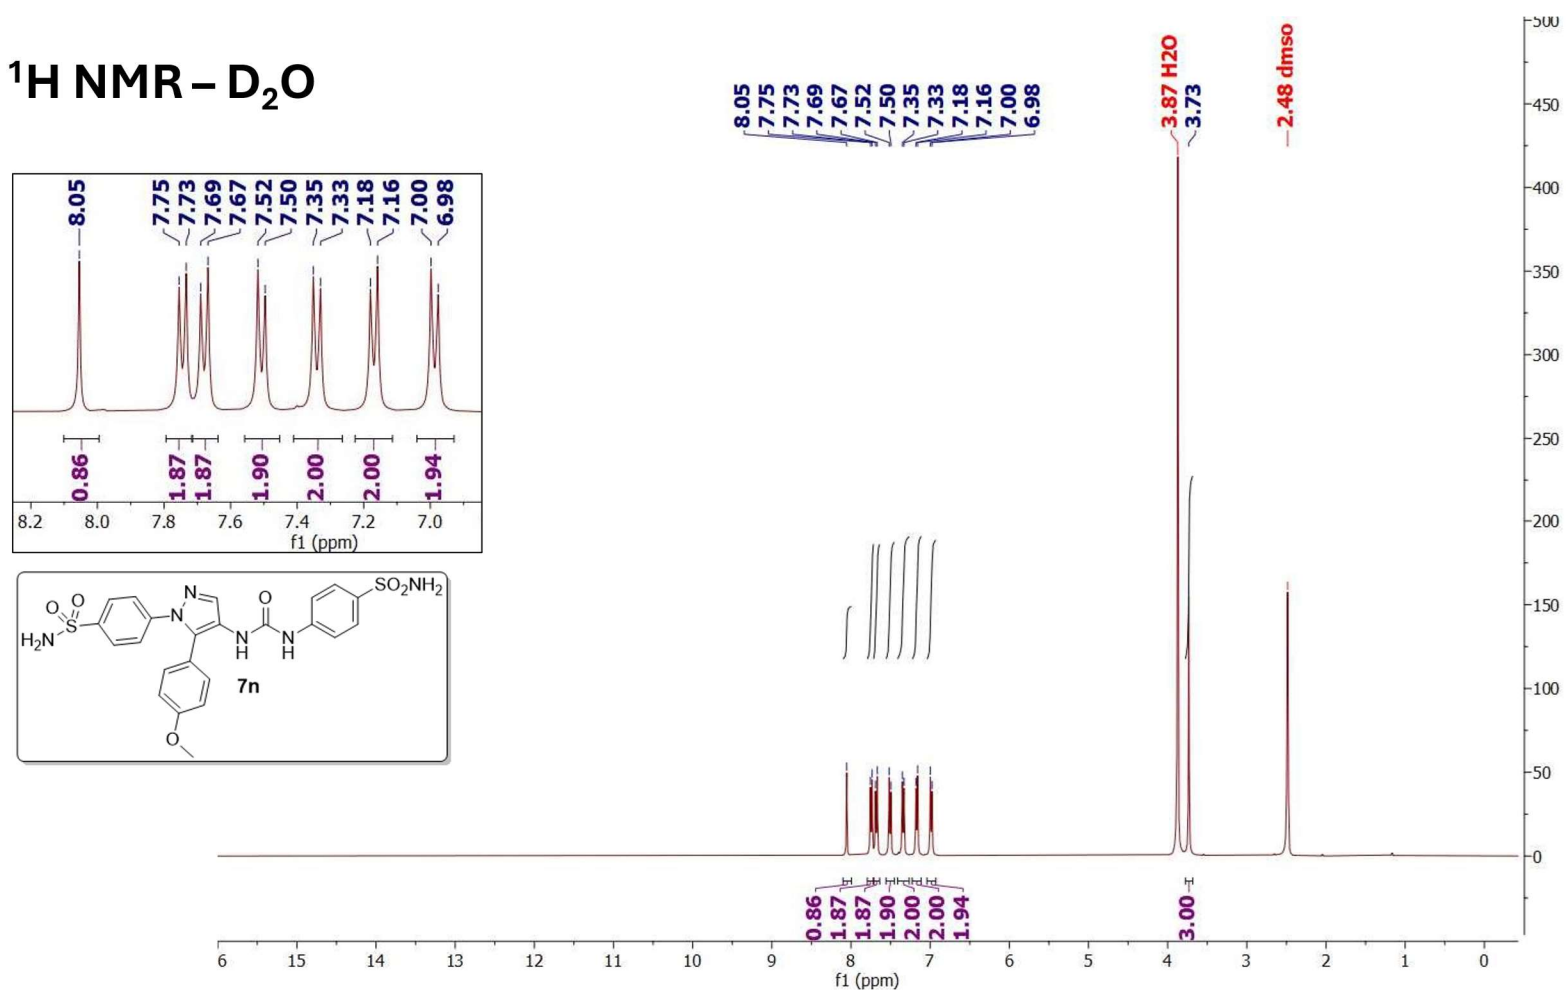Figure S18.  $^1\text{H}$  NMR spectrum of compound **7n** ( $\text{D}_2\text{O}$ ).

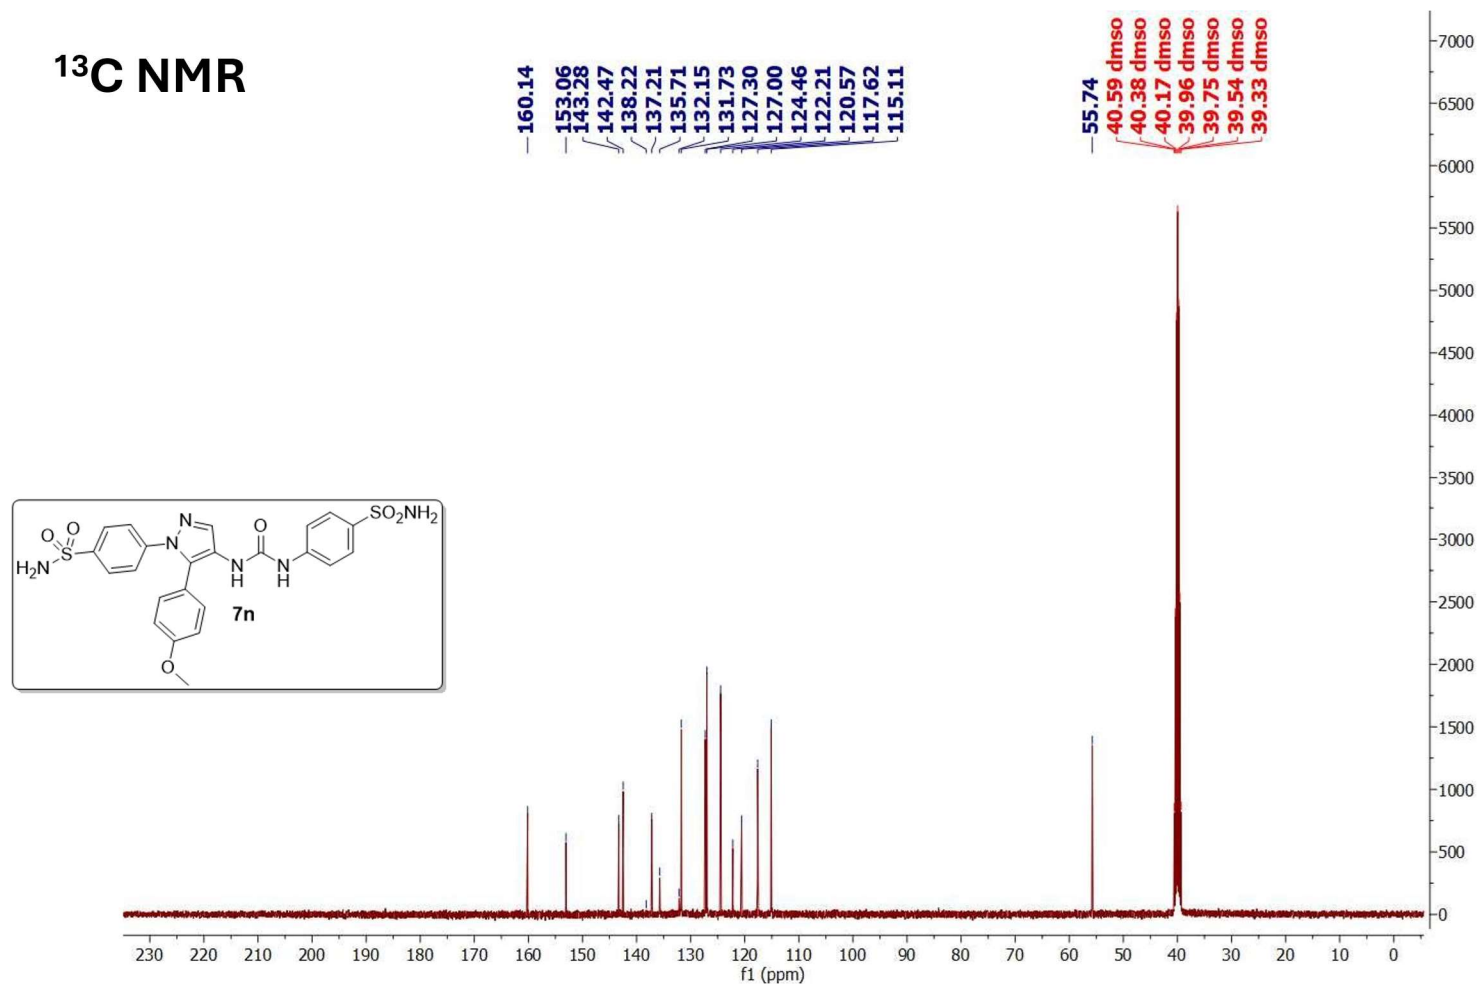

**Figure S19.**  $^{13}\text{C}$  NMR spectrum of compound **7n**.



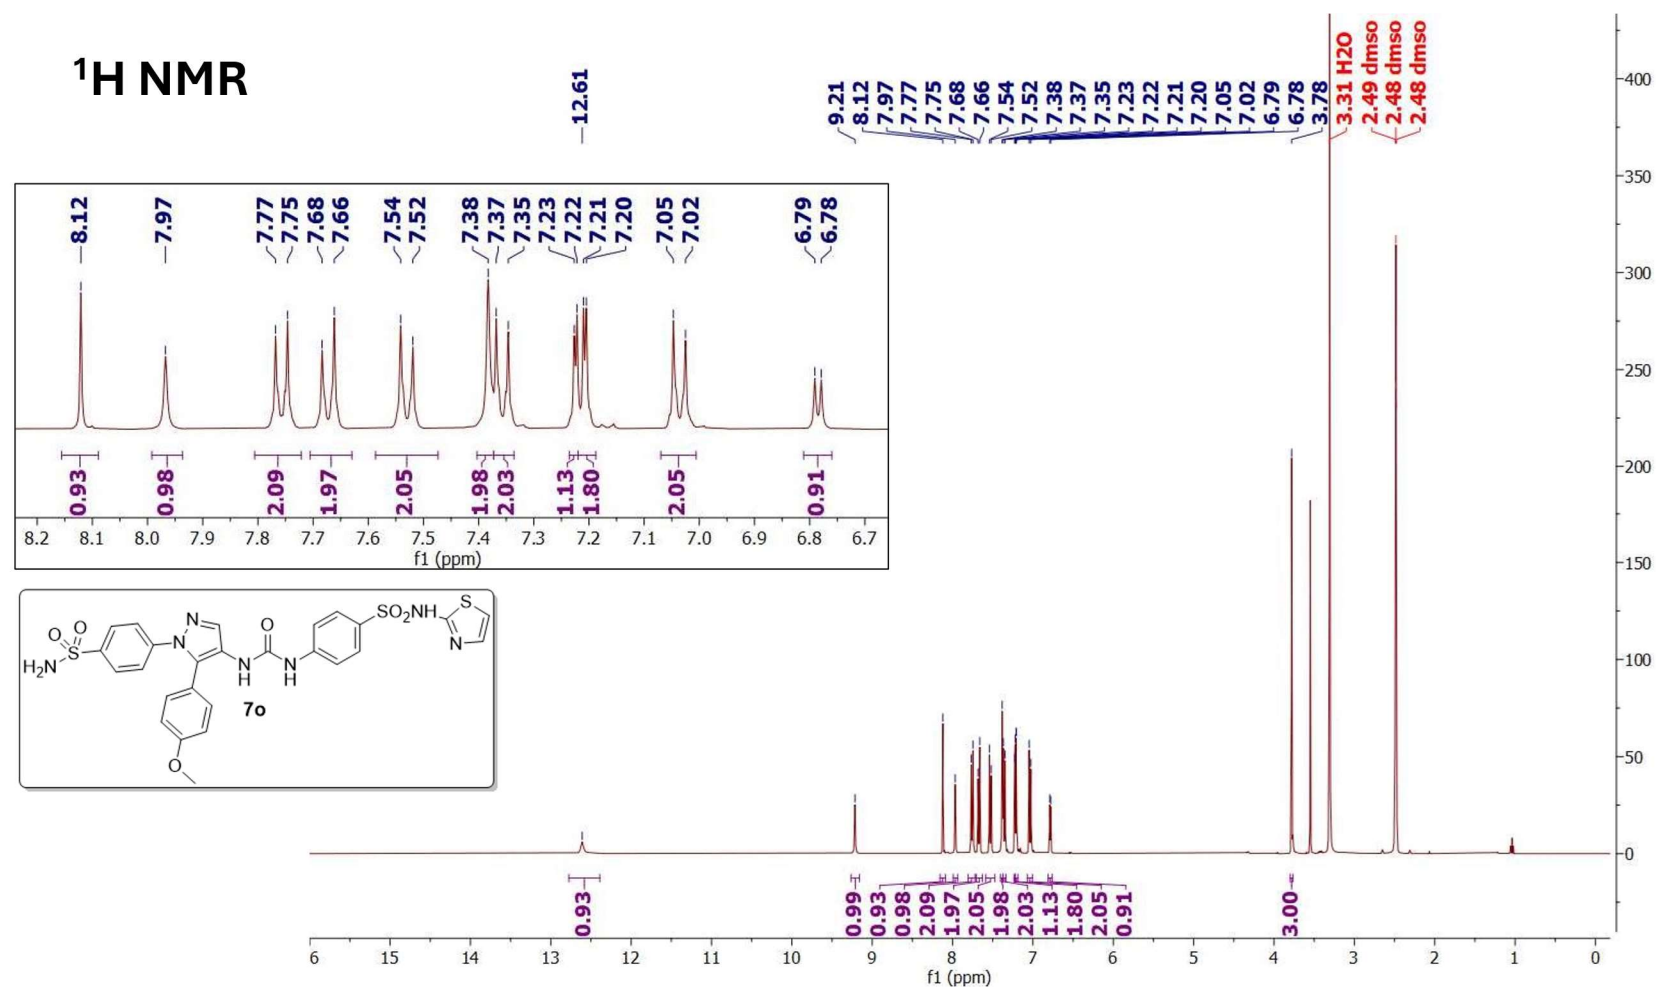Figure S20.  $^1\text{H}$  NMR spectrum of compound **7o**.

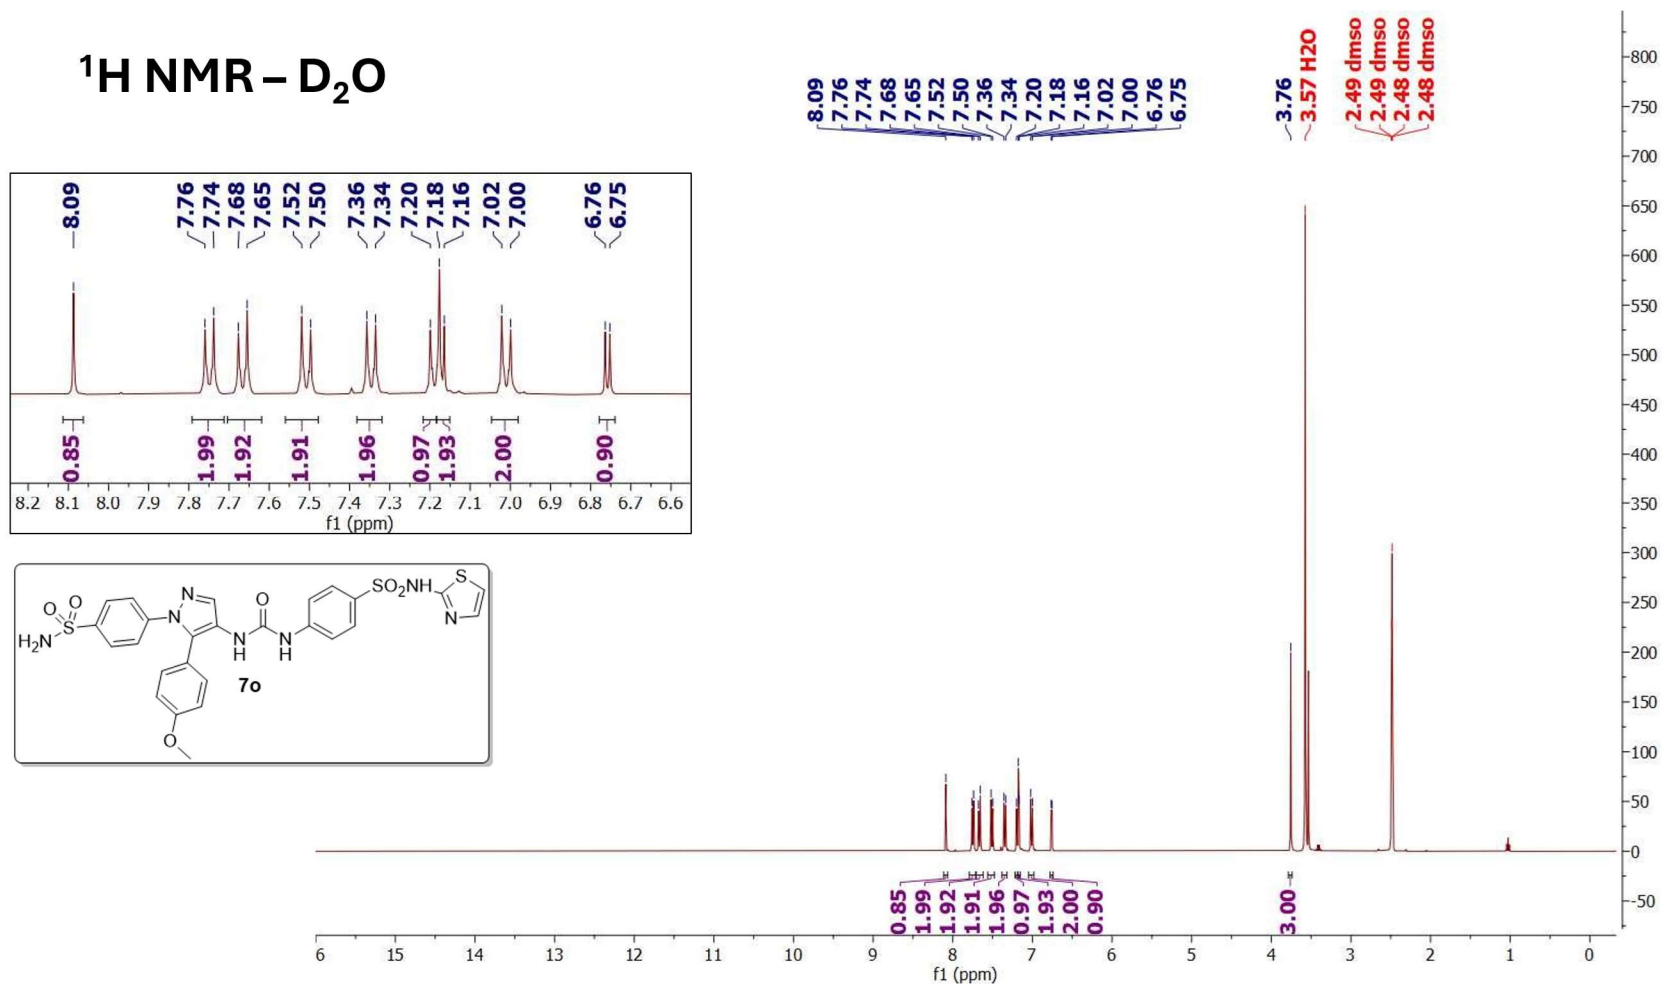

**Figure S21.**  $^1\text{H}$  NMR spectrum of compound **7o** ( $\text{D}_2\text{O}$ ).

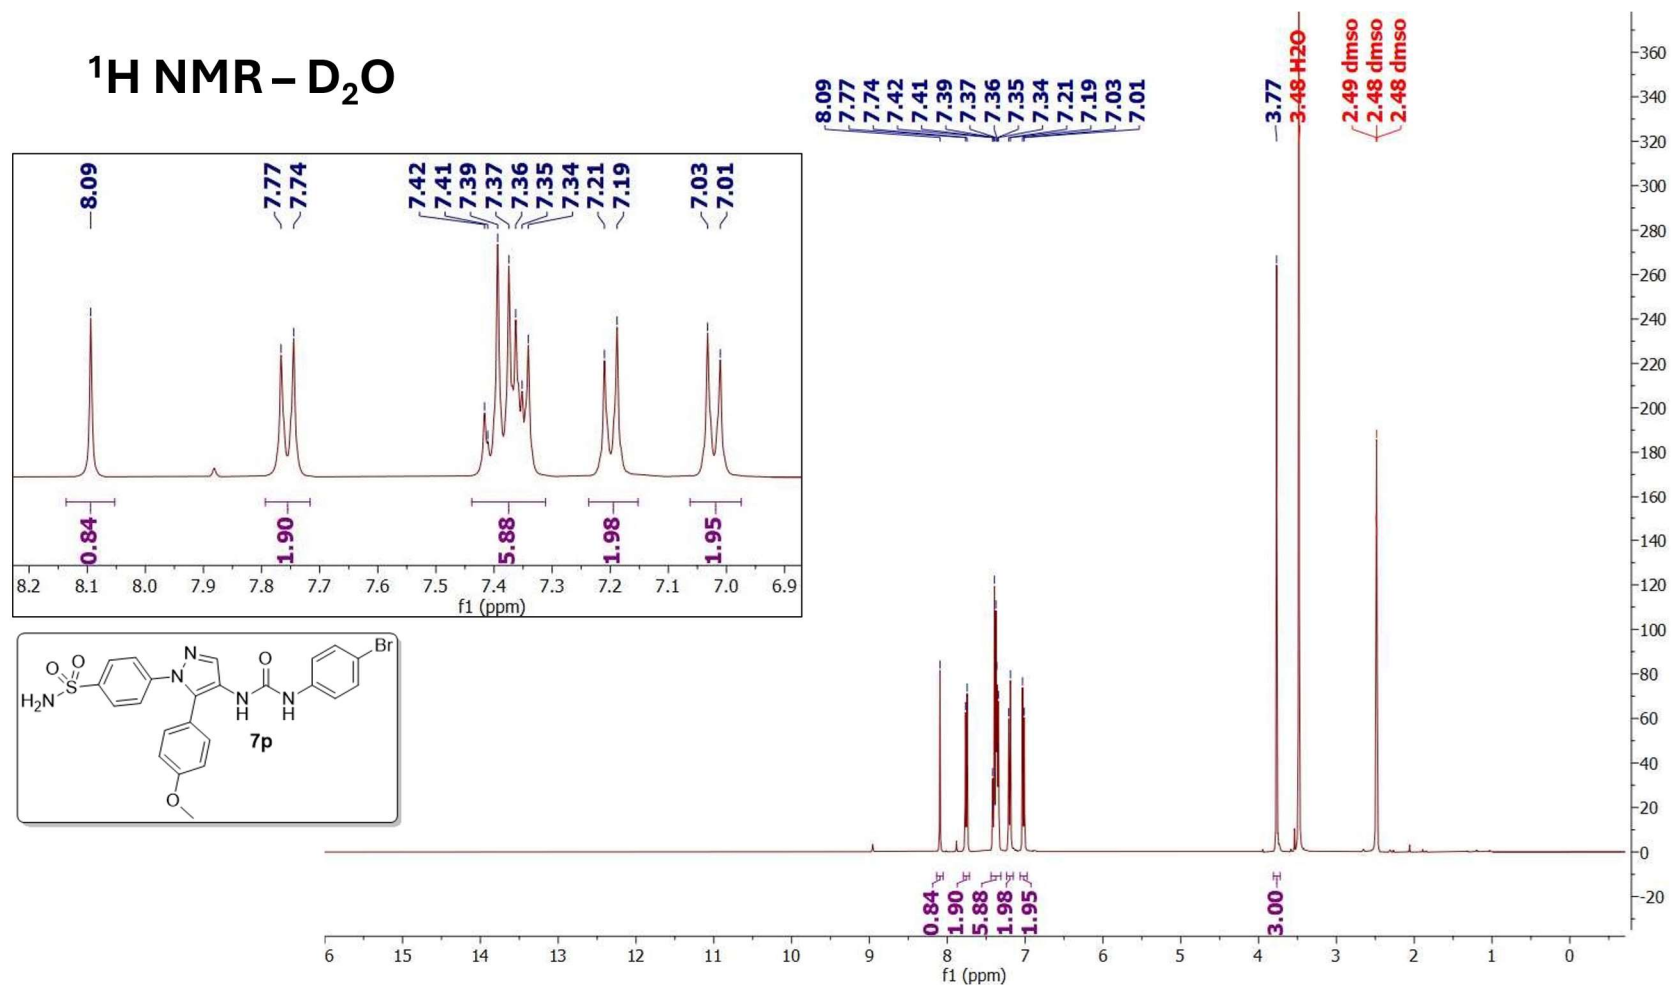

Figure S22.  $^1\text{H NMR}$  spectrum of compound **7p** ( $\text{D}_2\text{O}$ ).

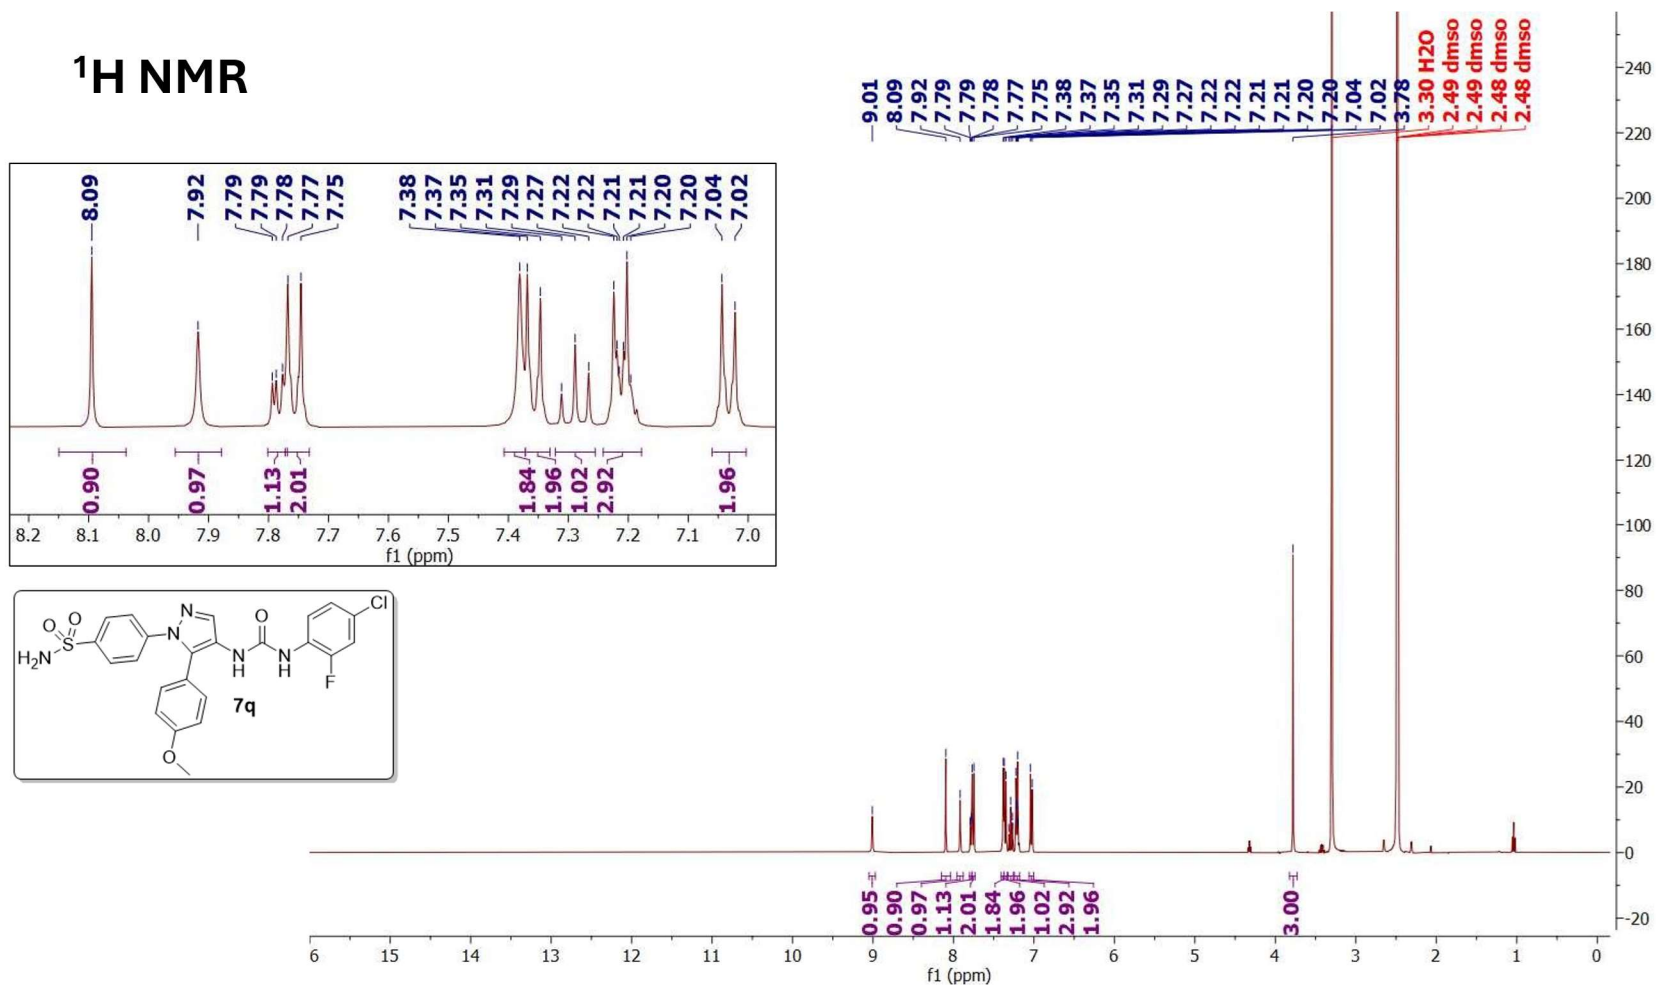Figure S23.  $^1\text{H}$  NMR spectrum of compound **7q**.

$^1\text{H}$  NMR –  $\text{D}_2\text{O}$ 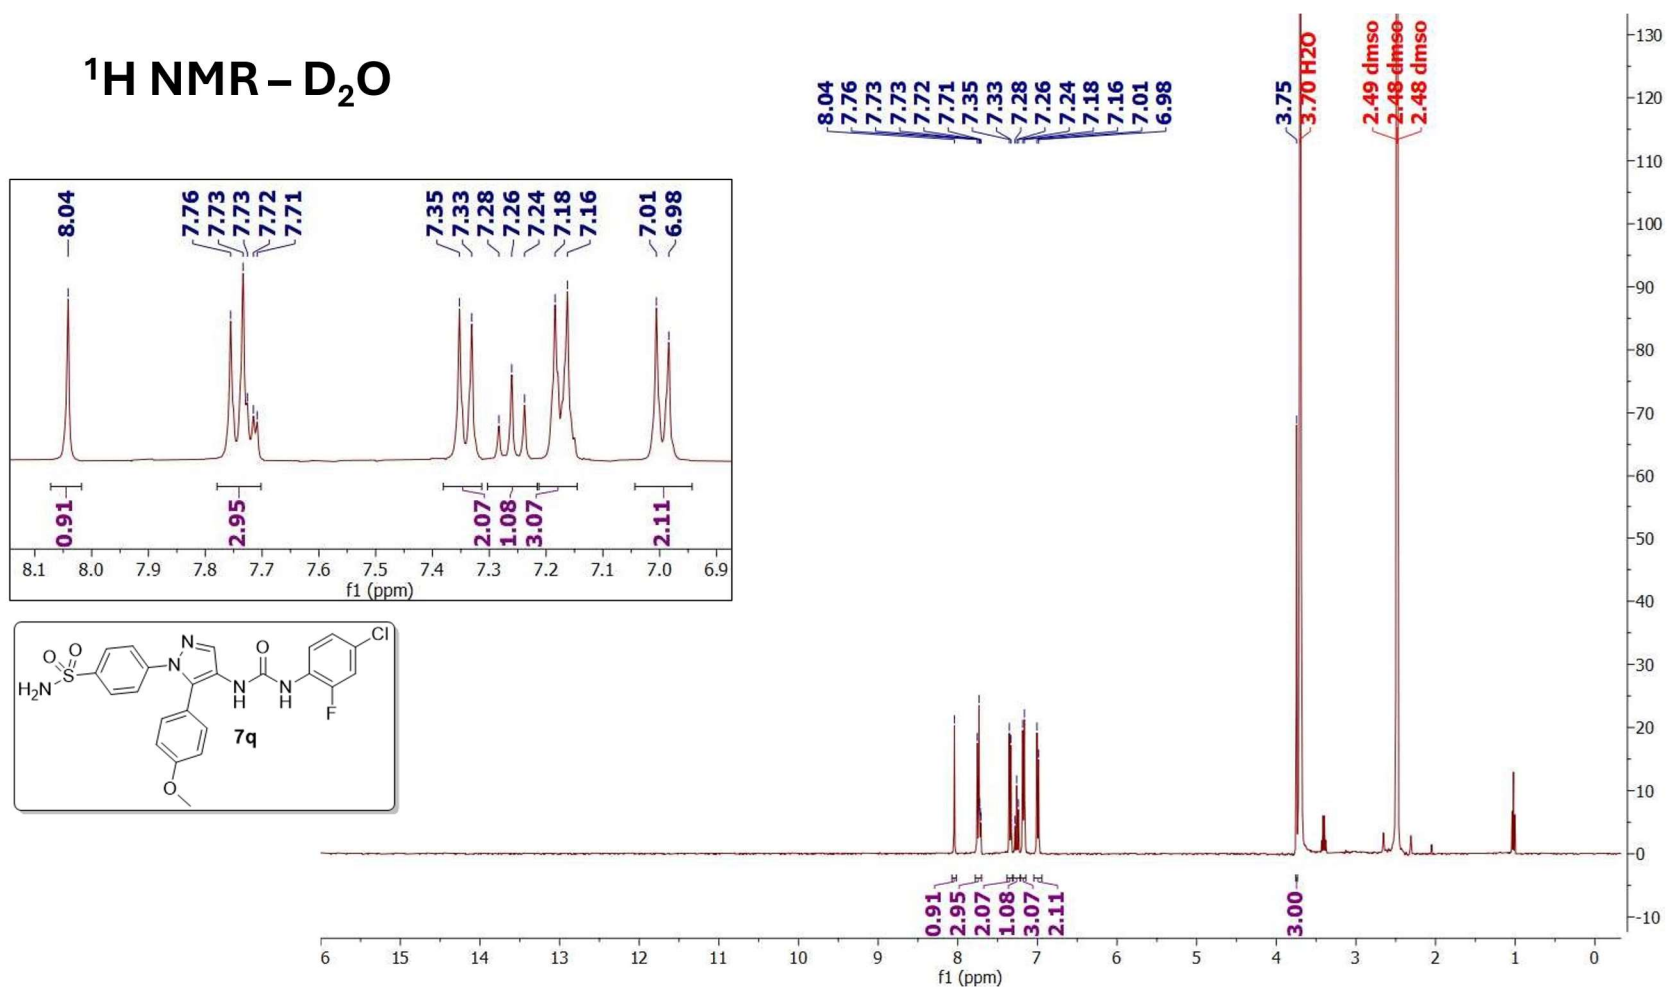Figure S24.  $^1\text{H}$  NMR spectrum of compound **7q**.

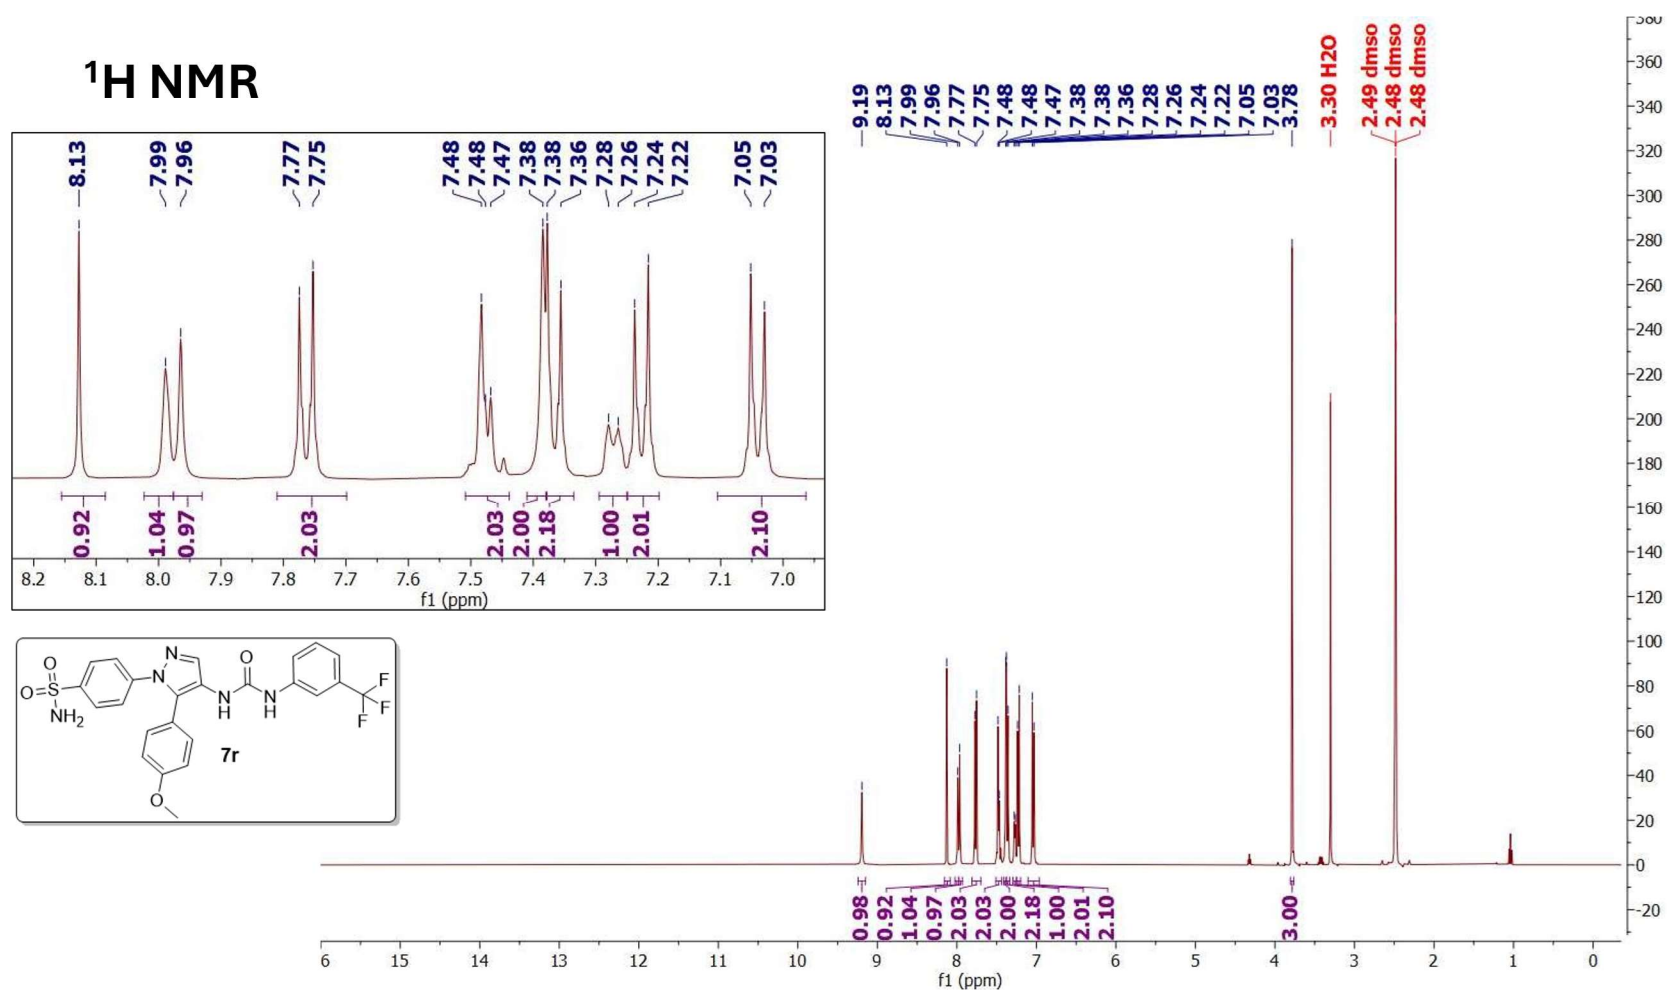Figure S24. <sup>1</sup>H NMR spectrum of compound **7r**.

$^1\text{H NMR} - \text{D}_2\text{O}$ 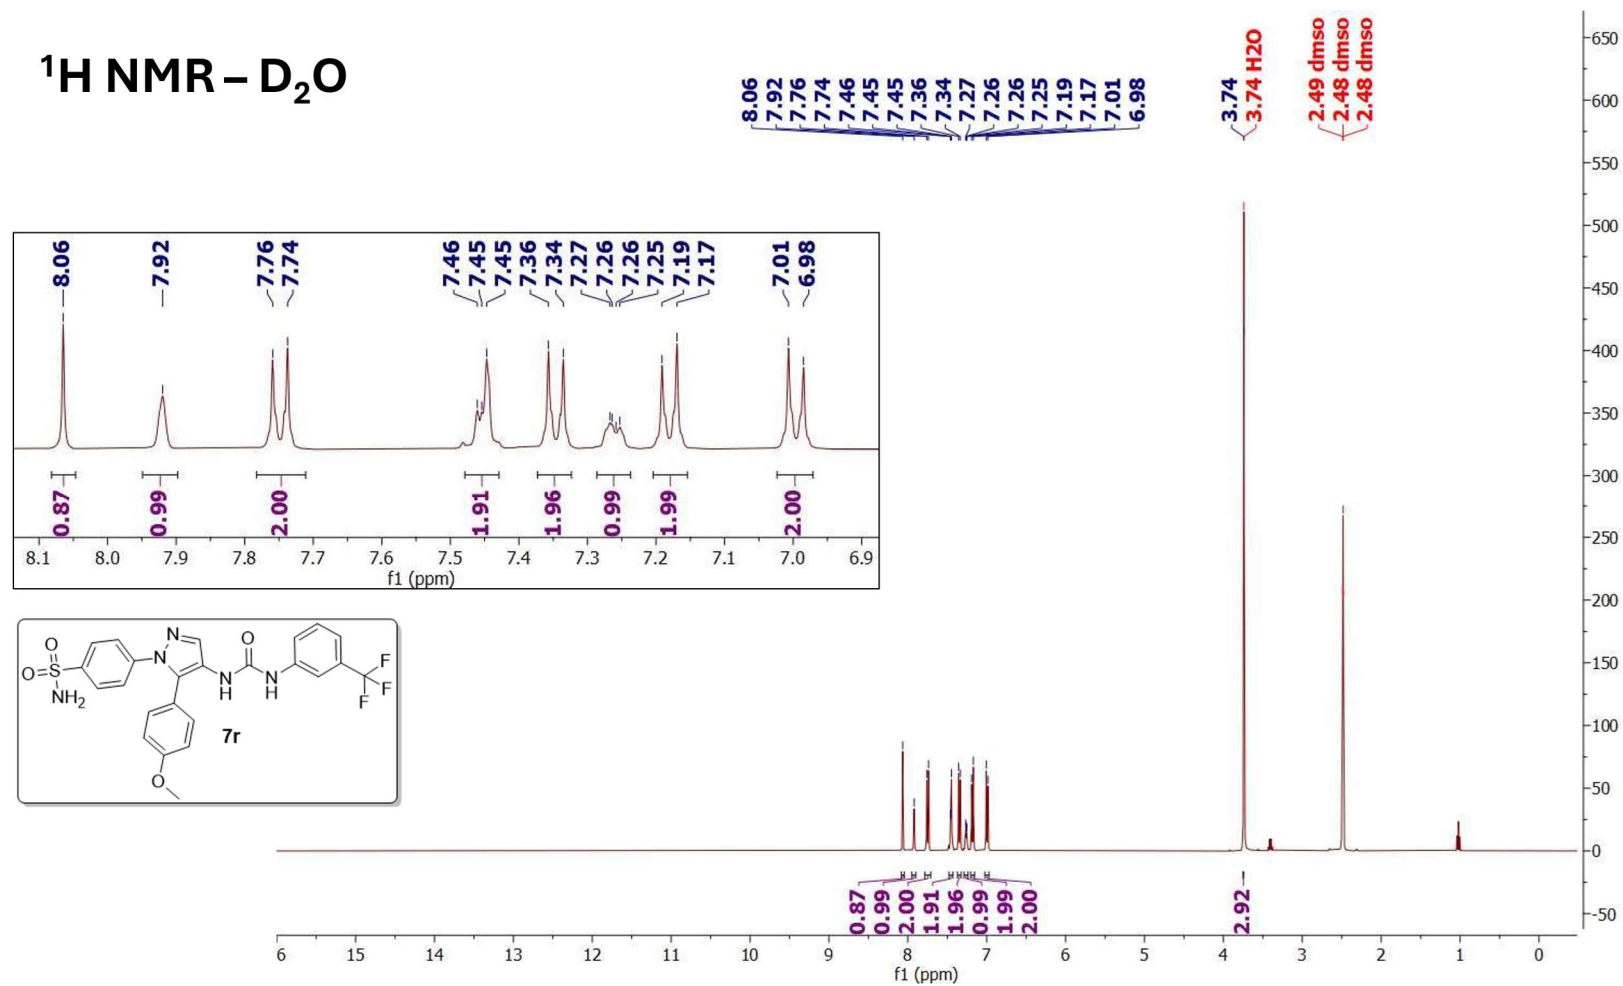Figure S26.  $^1\text{H NMR}$  spectrum of compound **7r** ( $\text{D}_2\text{O}$ ).

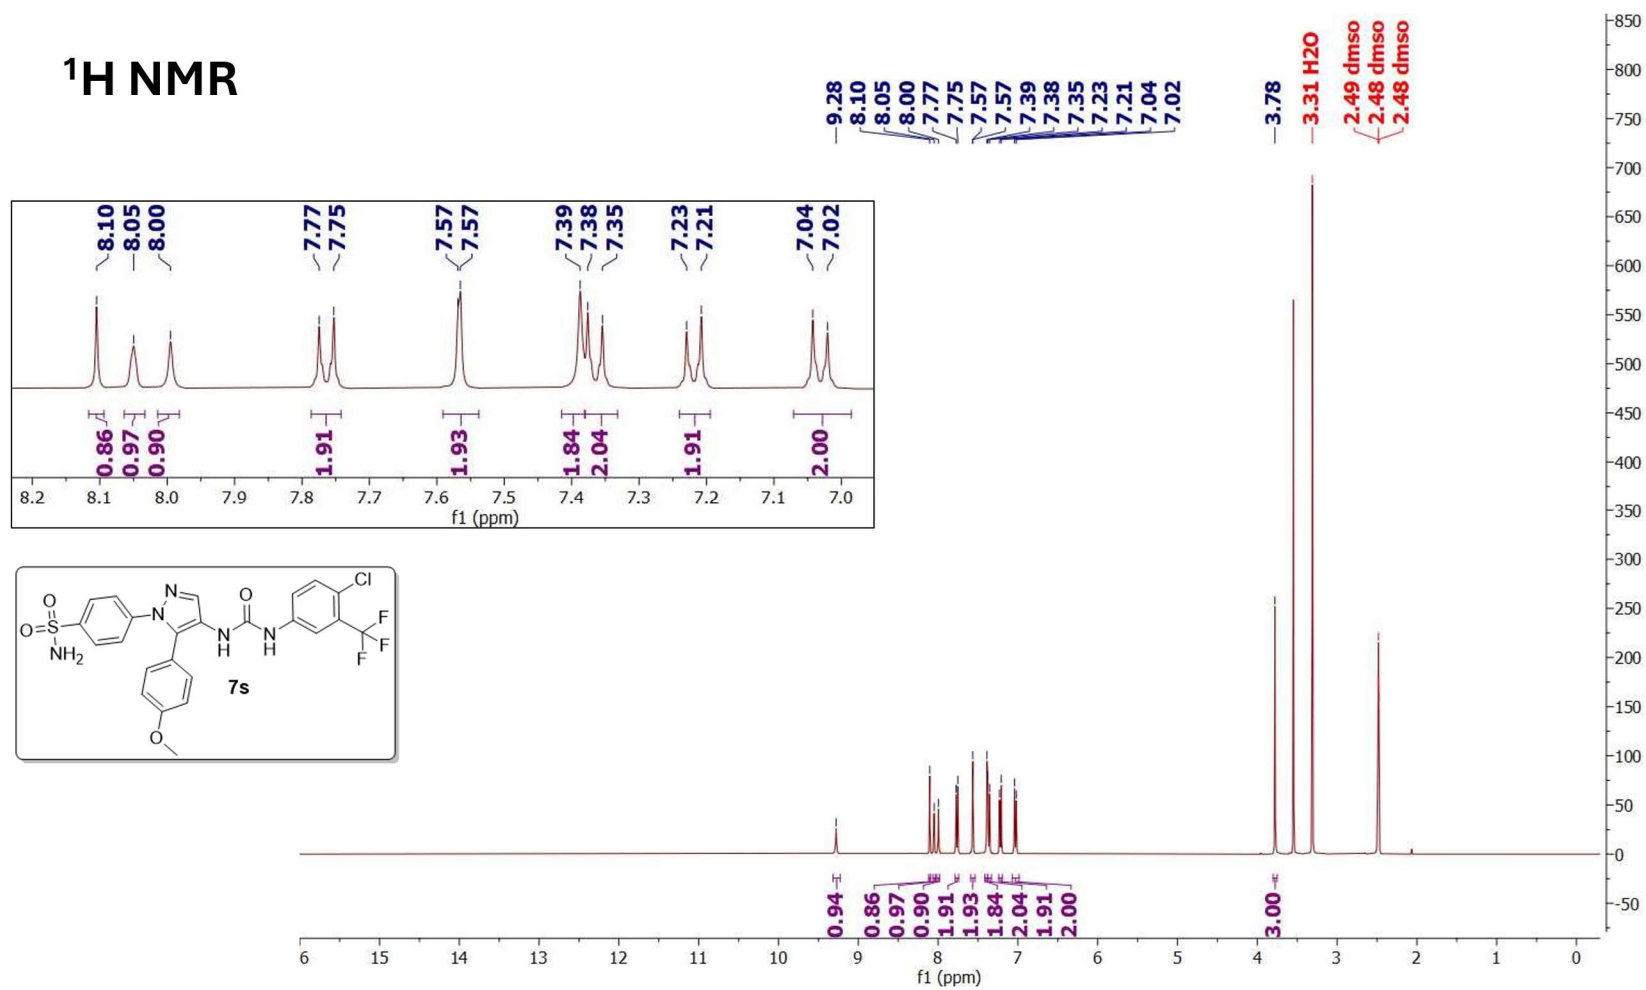Figure S27.  $^1\text{H}$  NMR spectrum of compound **7s**.



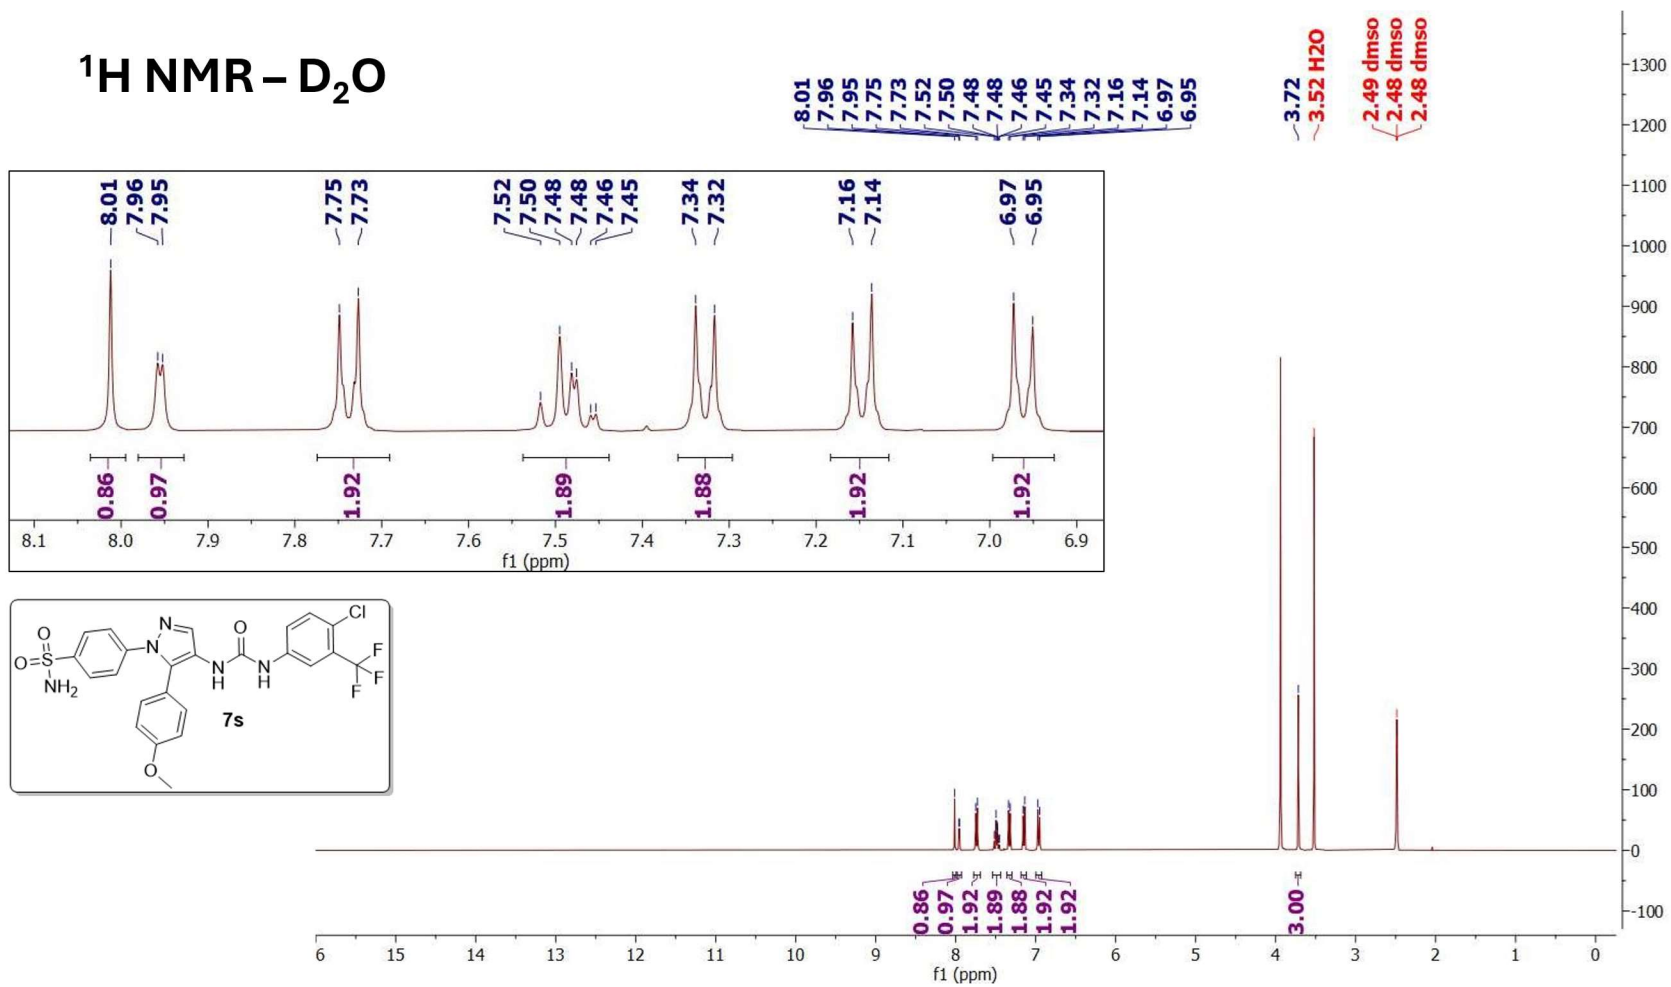

**Figure S28.**  $^1\text{H NMR}$  spectrum of compound **7s** (D<sub>2</sub>O).

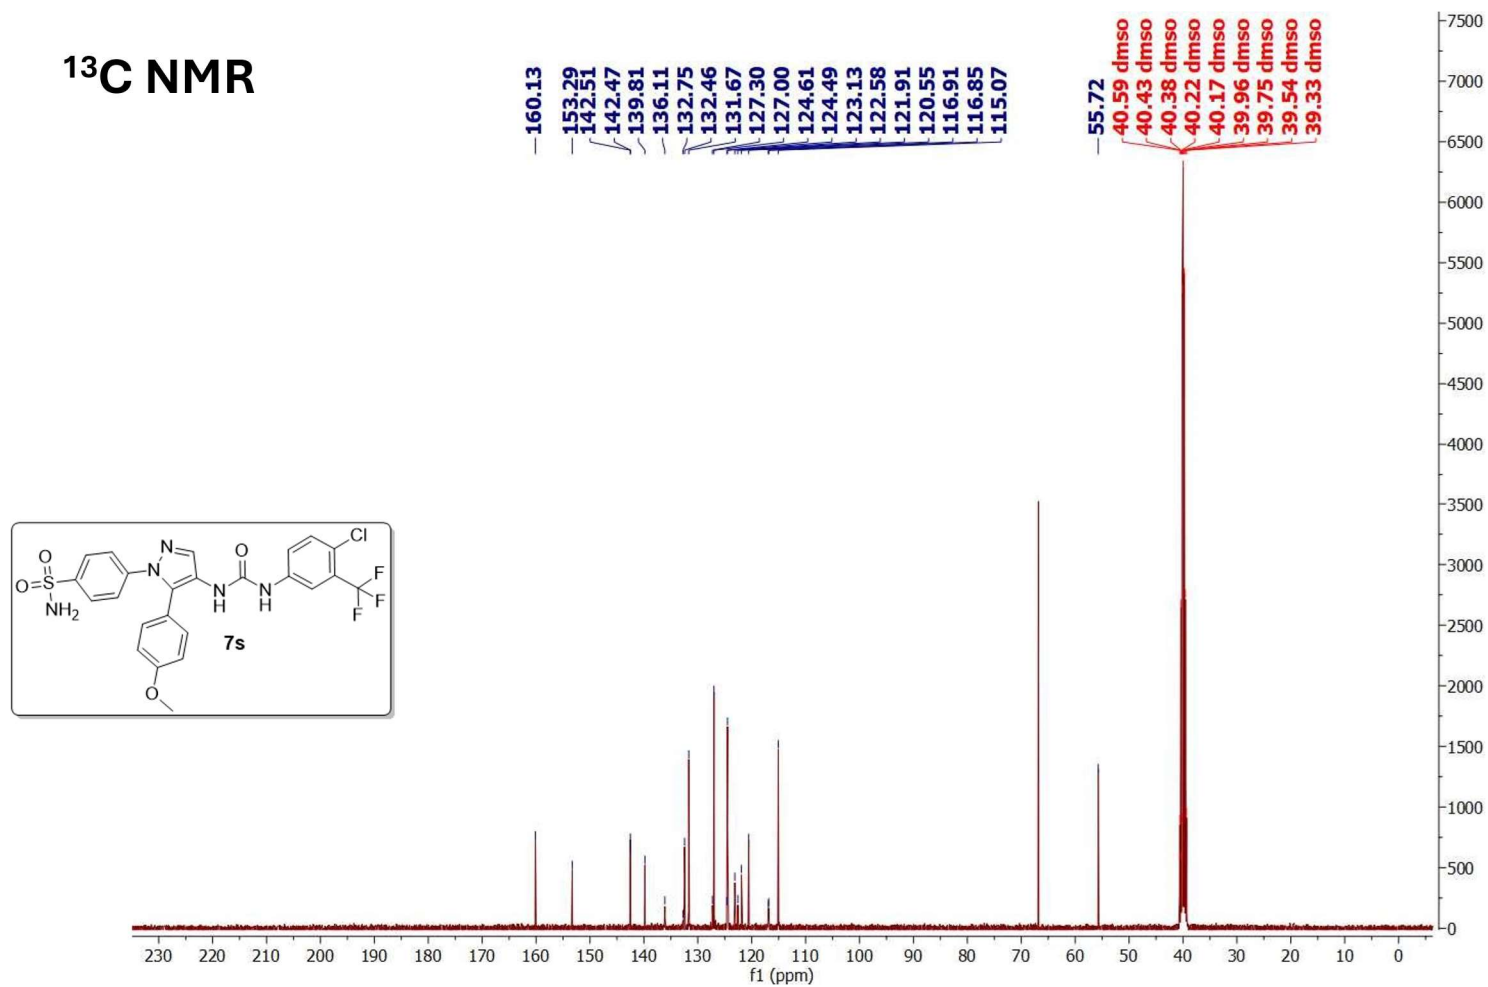

**Figure S29.**  $^{13}\text{C}$  NMR spectrum of compound **7s**.

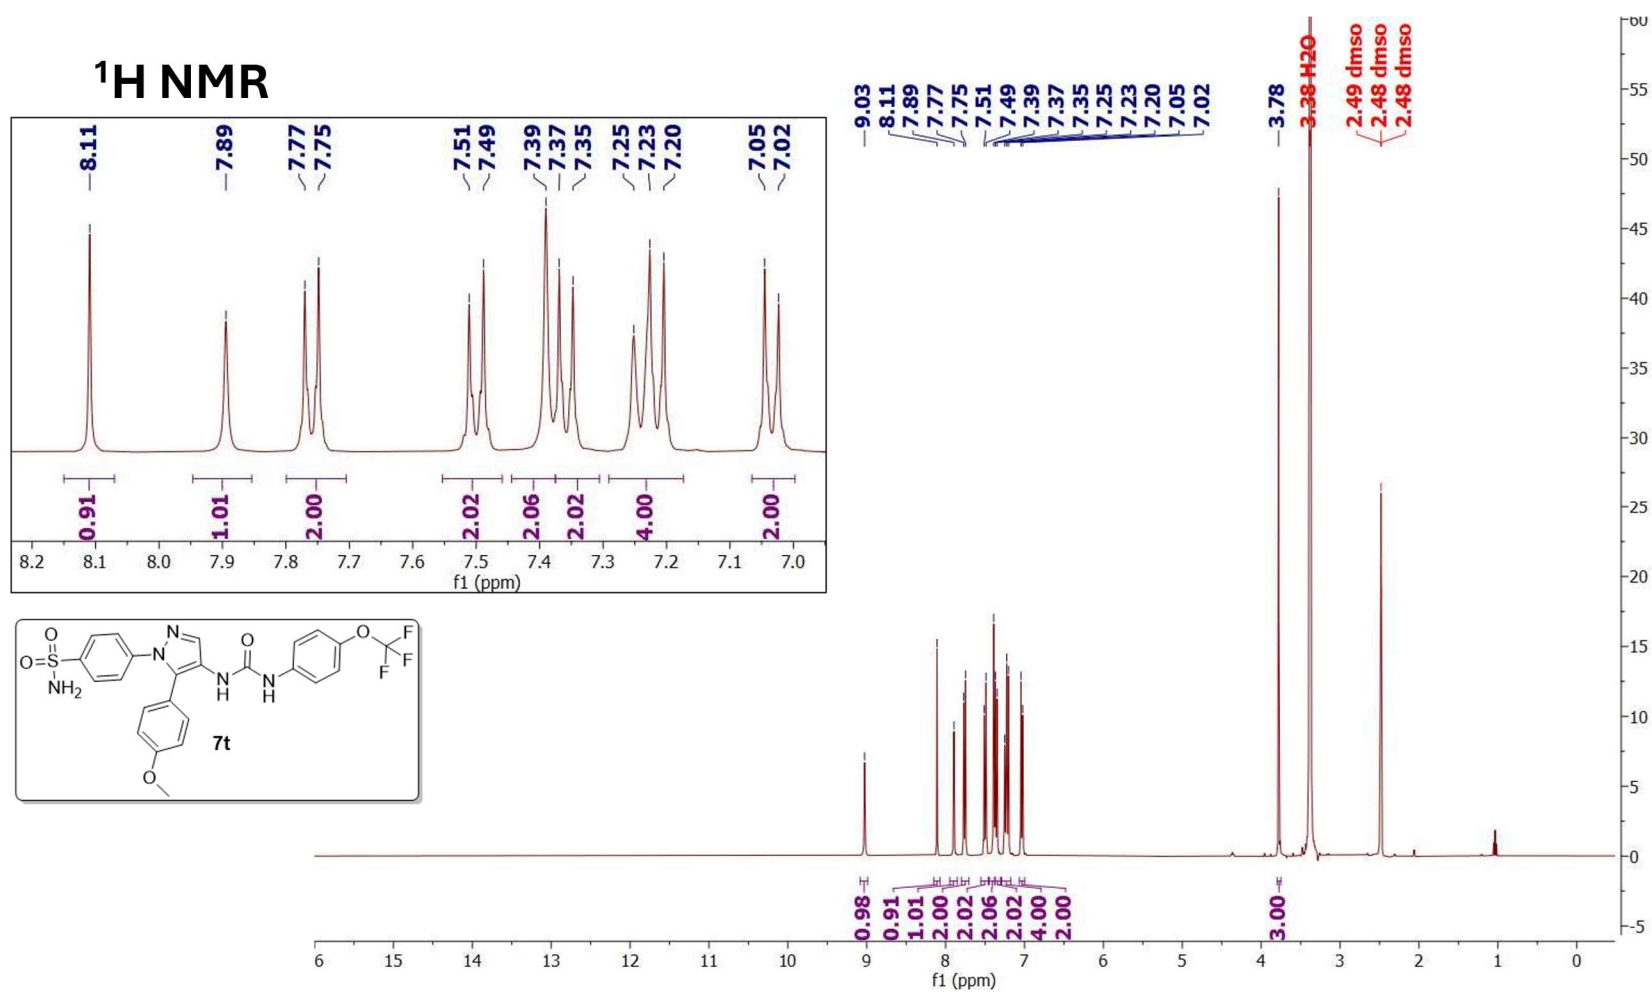

Figure S30. <sup>1</sup>H NMR spectrum of compound **7t**.

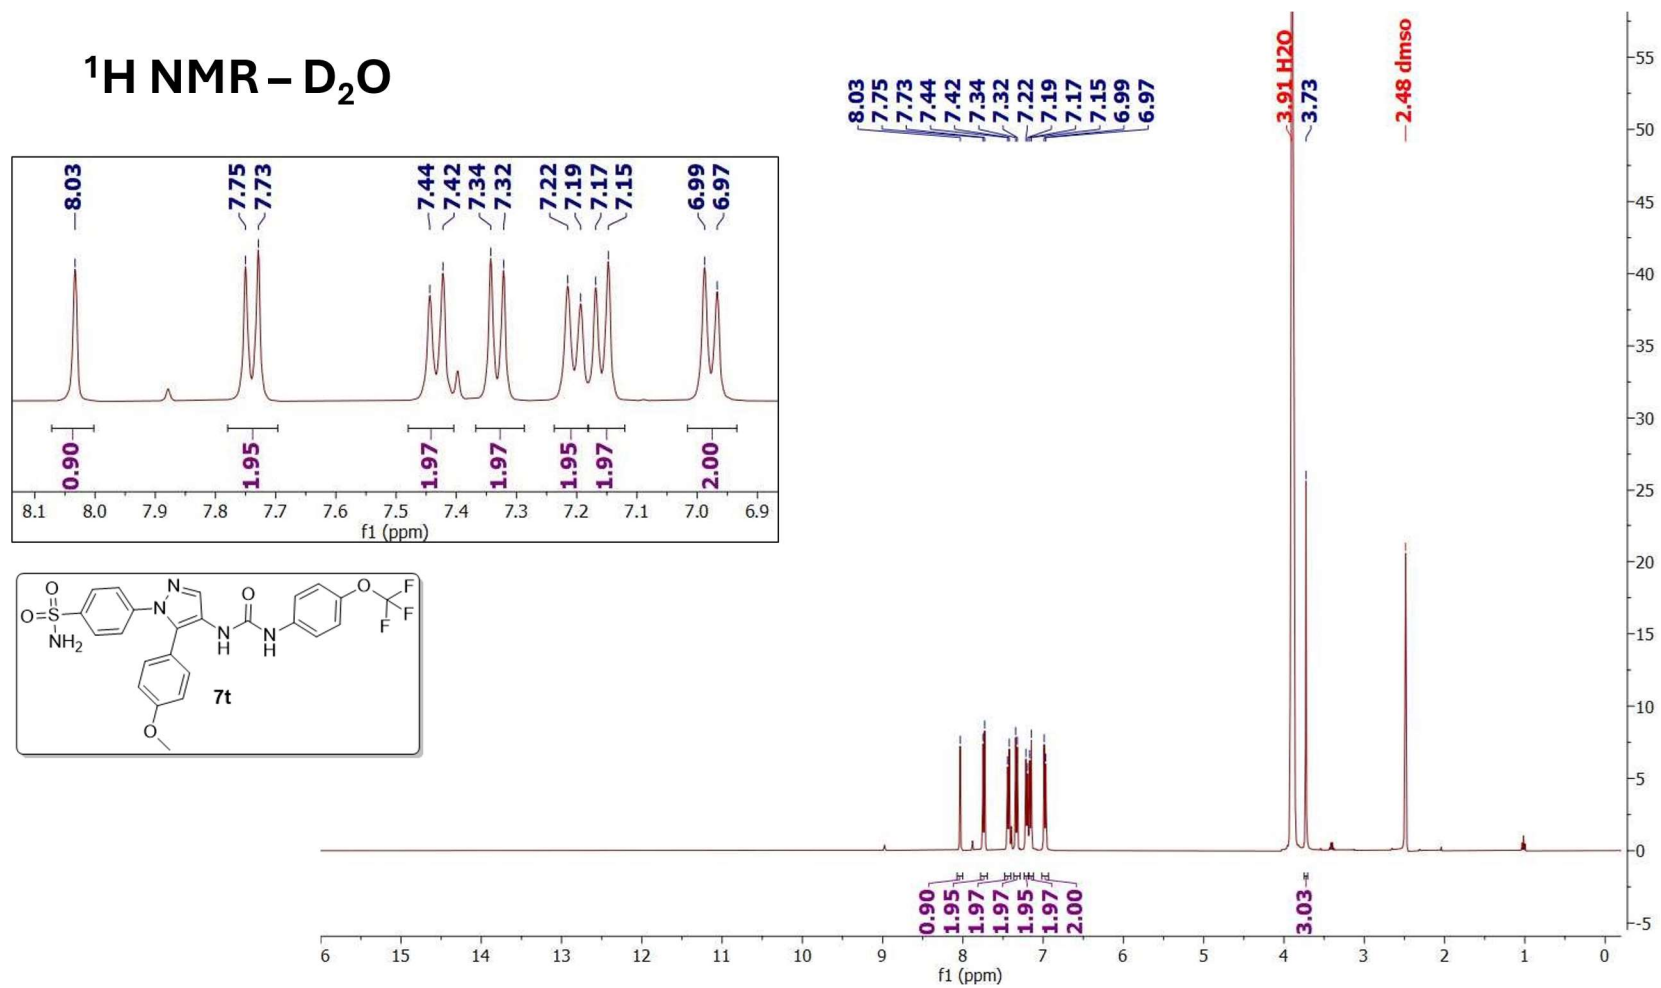

**Figure S31.**  $^1\text{H NMR}$  spectrum of compound **7t** ( $\text{D}_2\text{O}$ ).

$^{13}\text{C}$  NMR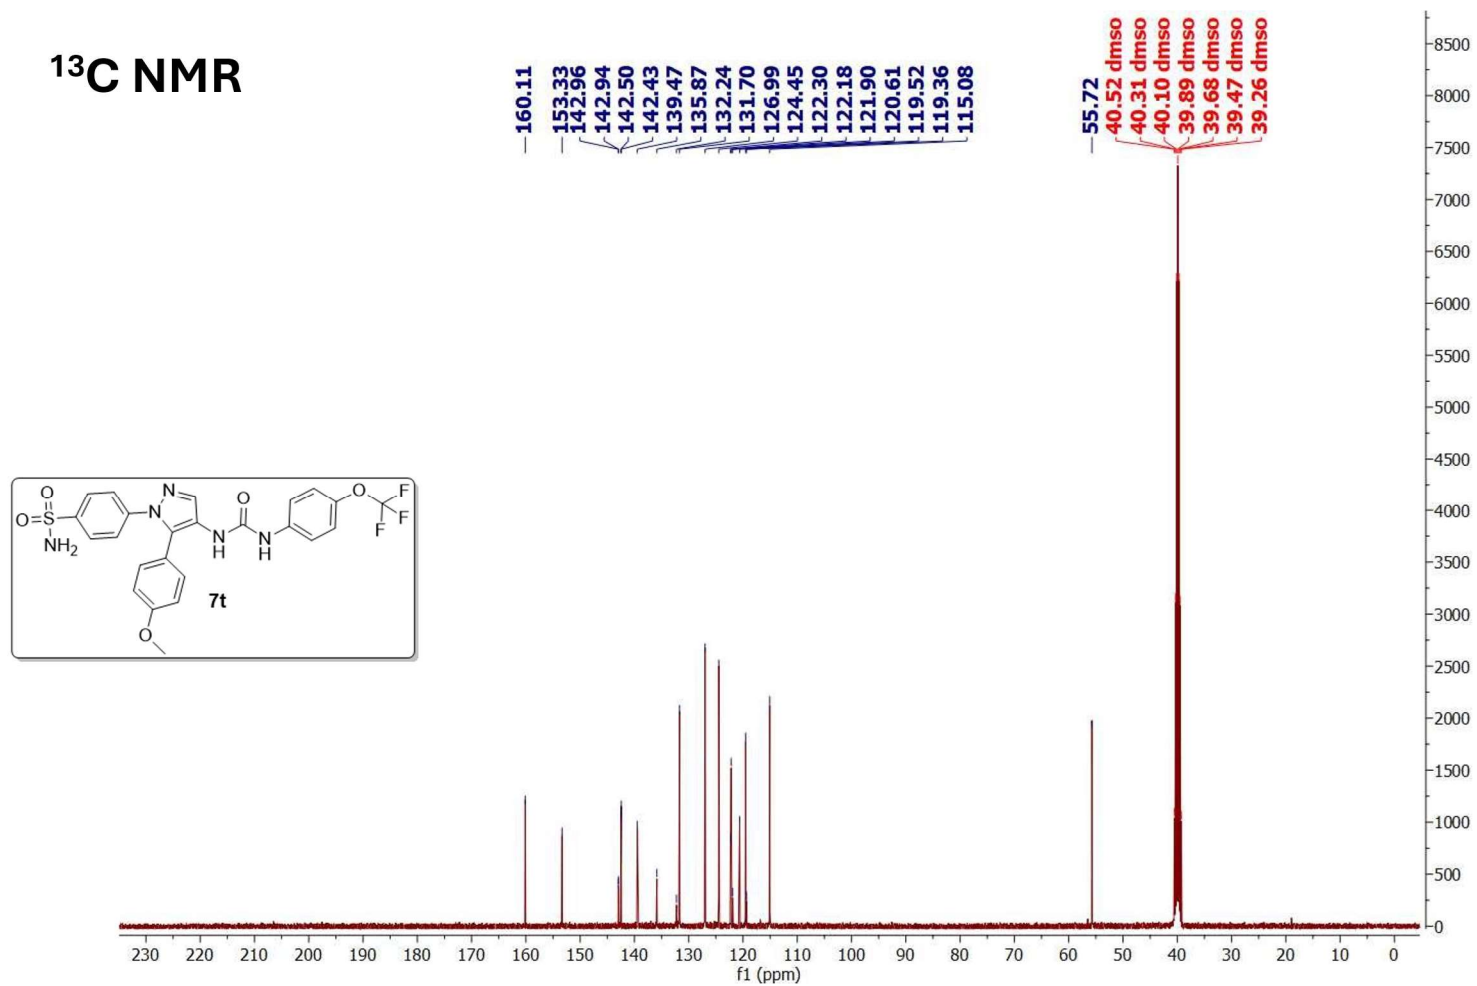Figure S32.  $^{13}\text{C}$  NMR spectrum of compound 7t.

## HRMS spectra of the final compounds

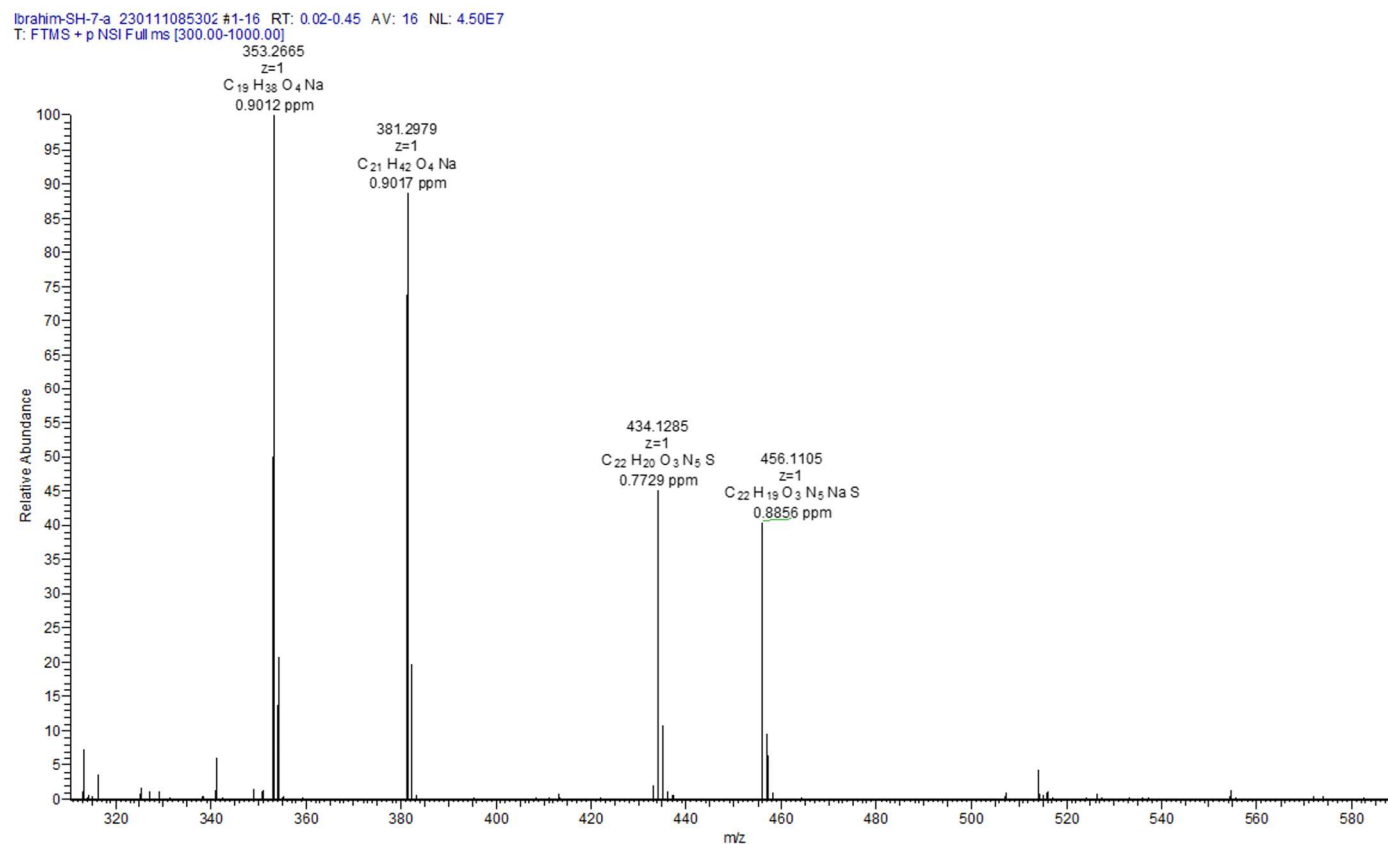

**Figure S33.** HRMS spectrum of compound **7a**.

Supporting information

Ibrahim-SH-7-a-neq #1-17 RT: 0.02-0.46 AV: 17 NL: 4.04E5  
T: FTMS - p NSI Full ms [300.00-1000.00]

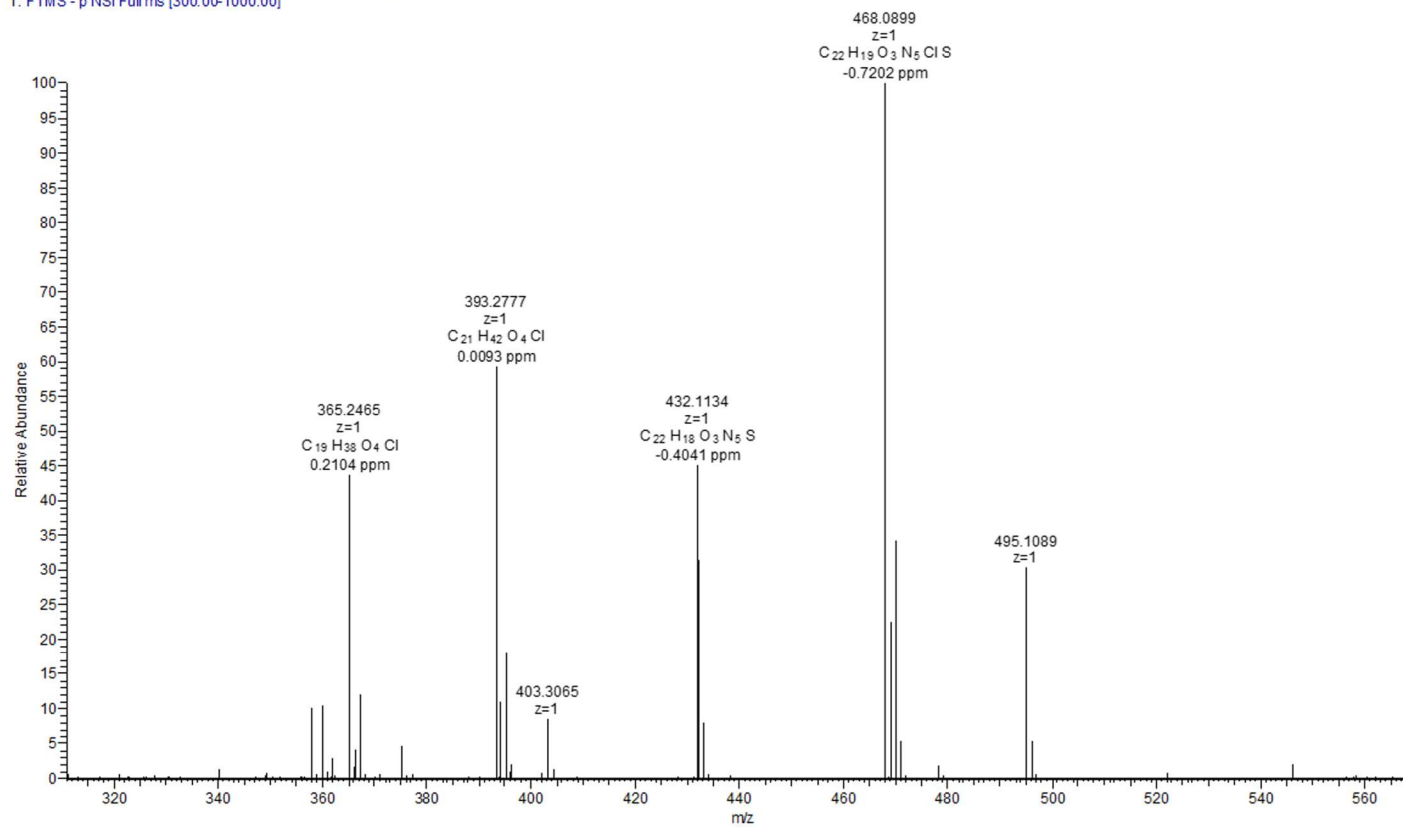

Figure S34. HRMS spectrum of compound 7a.

Supporting information

Ibrahim-SH-7-b 230130075252 #1-13 RT: 0.02-0.37 AV: 13 NL: 1.29E7  
T: FTMS + p NSI Full ms [300.00-1000.00]

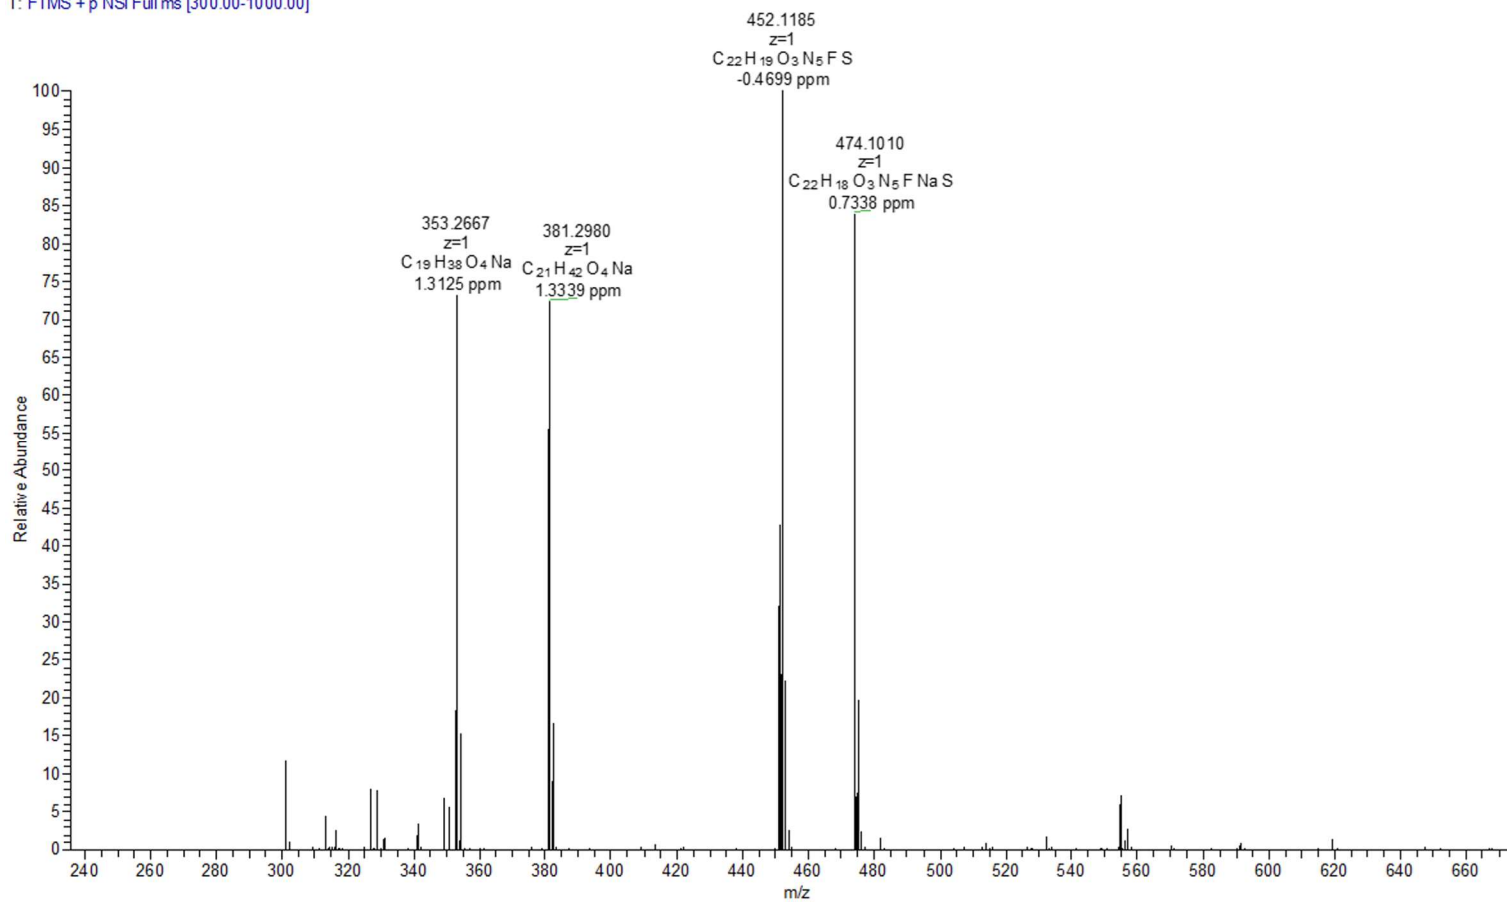

Figure S35. HRMS spectrum of compound 7b.



## Supporting information

Ibrahim-SH-7-c #1-16 RT: 0.02-0.45 AV: 16 NL: 8.68E6  
T: FTMS + p NSI Full ms [300.00-1000.00]

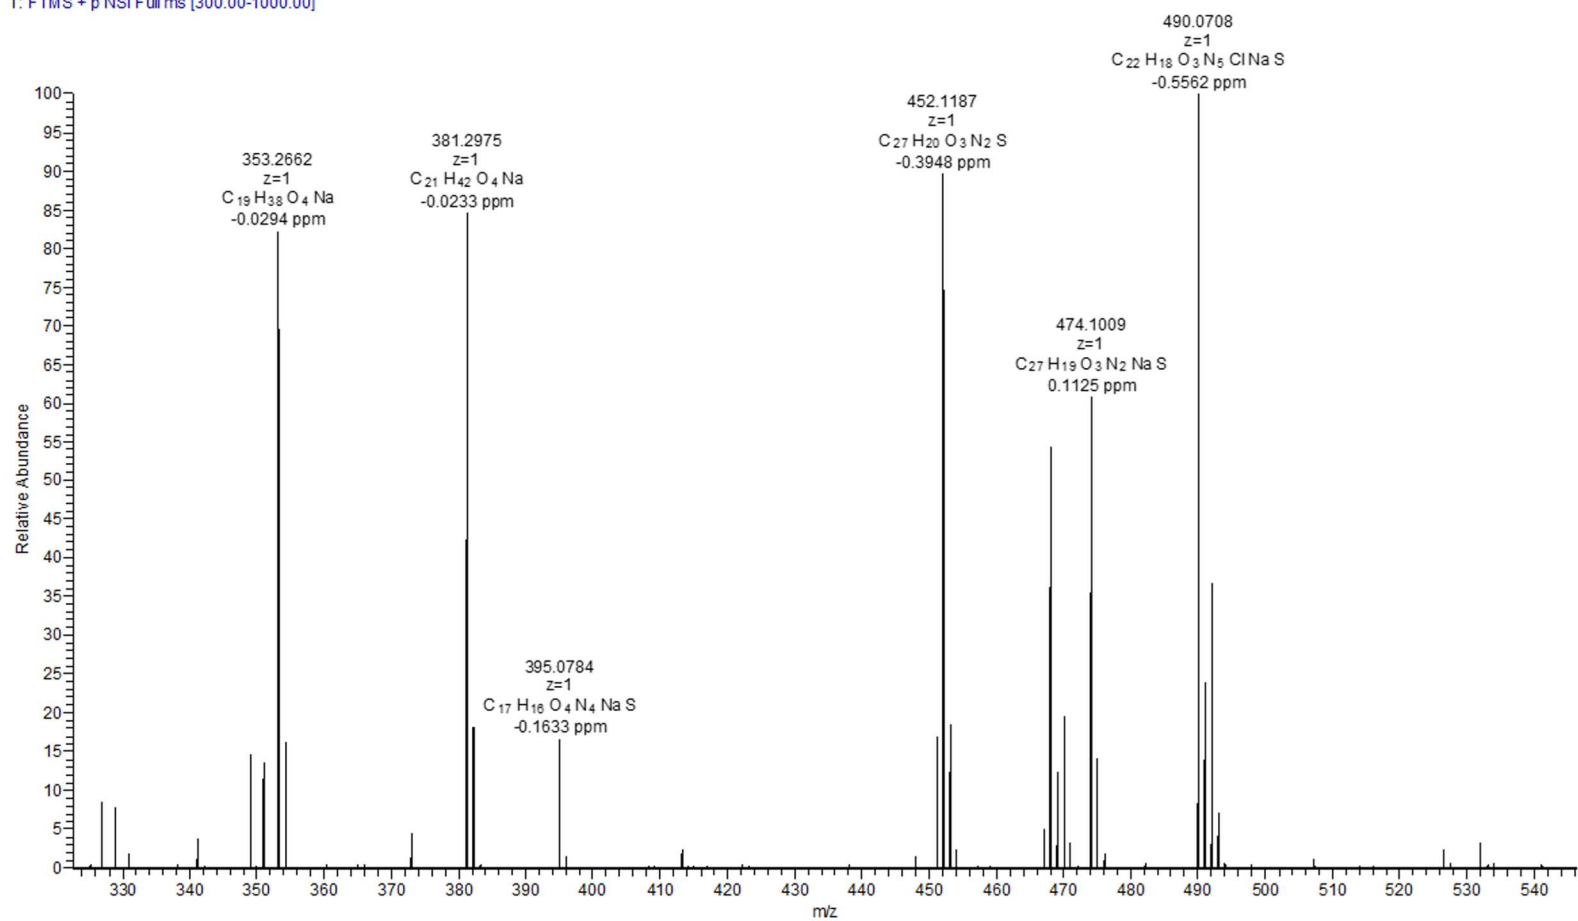

**Figure S36.** HRMS spectrum of compound **7c**.

## Supporting information

Ibrahim-SH-7-c #1-16 RT: 0.02-0.45 AV: 16 NL: 8.68E6  
T: FTMS + p NSI Full ms [300.00-1000.00]

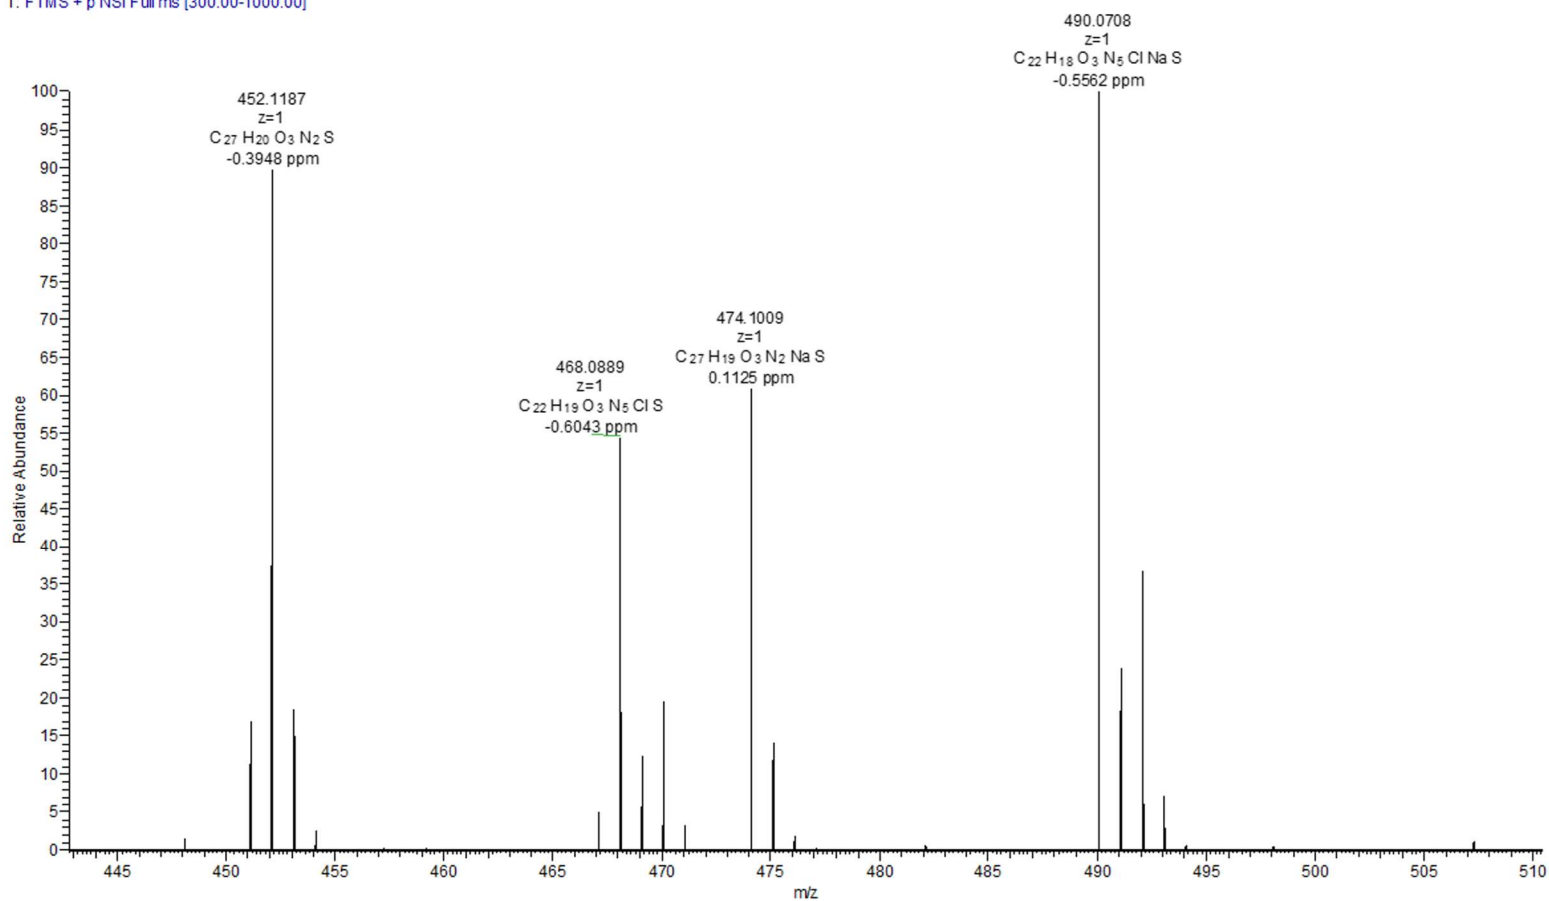

**Figure S37.** HRMS spectrum of compound 7c.

## Supporting information

Ibrahim-SH-7-c-neq #1-17 RT: 0.01-0.46 AV: 17 NL: 1.15E7  
T: FTMS - p NSI Full ms [300.00-1000.00]

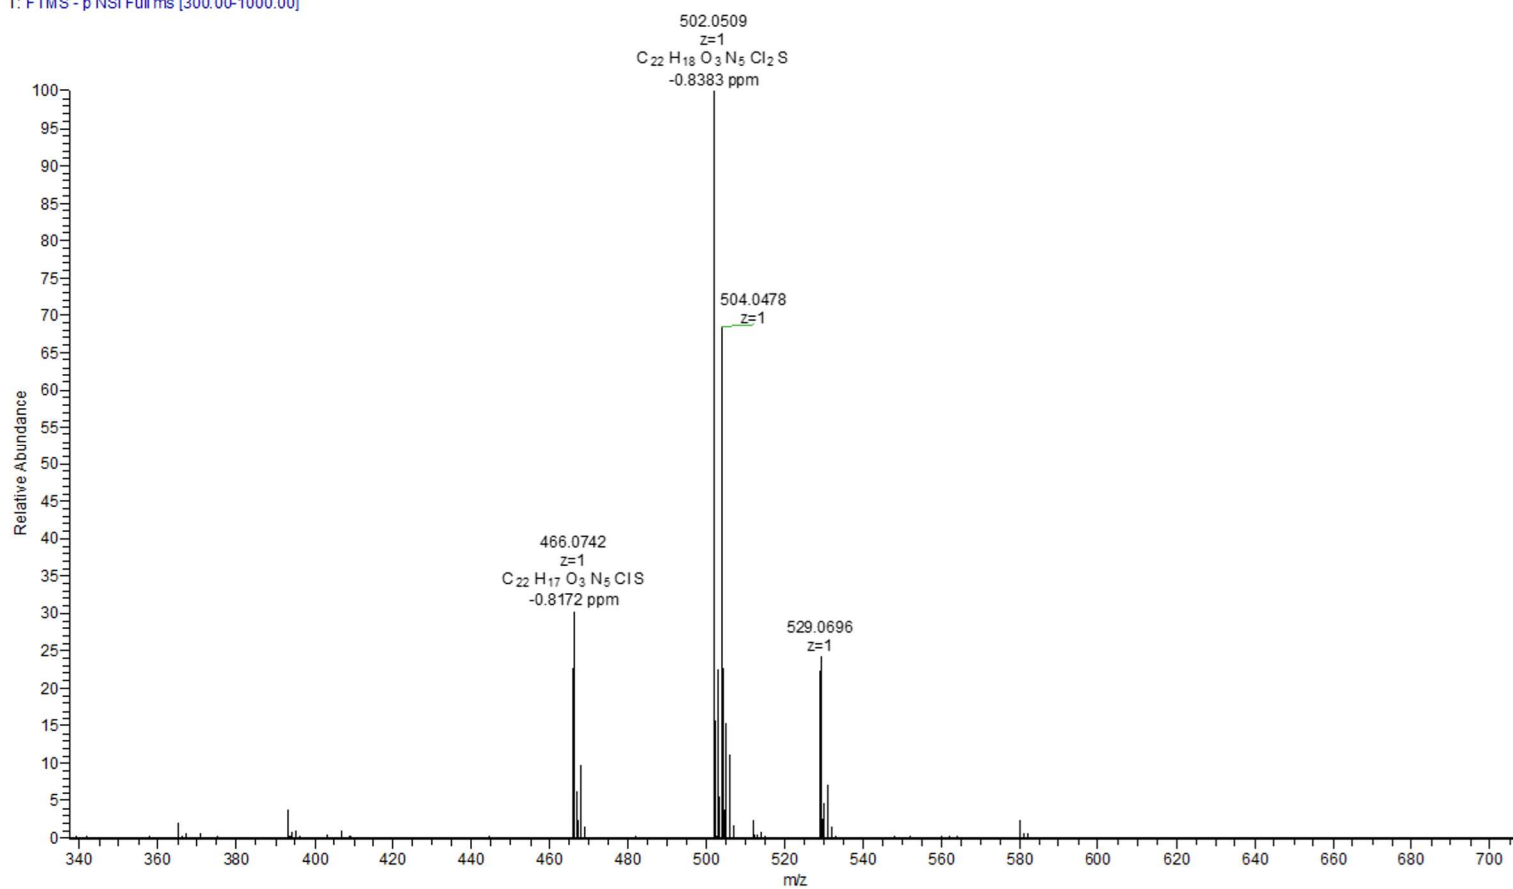

**Figure S38.** HRMS spectrum of compound 7c.

## Supporting information

Ibrahim-SH-7-d 230130075252 #1-16 RT: 0.01-0.44 AV: 16 NL: 3.34E7  
T: FTMS + p NSI Full ms [300.00-1000.00]

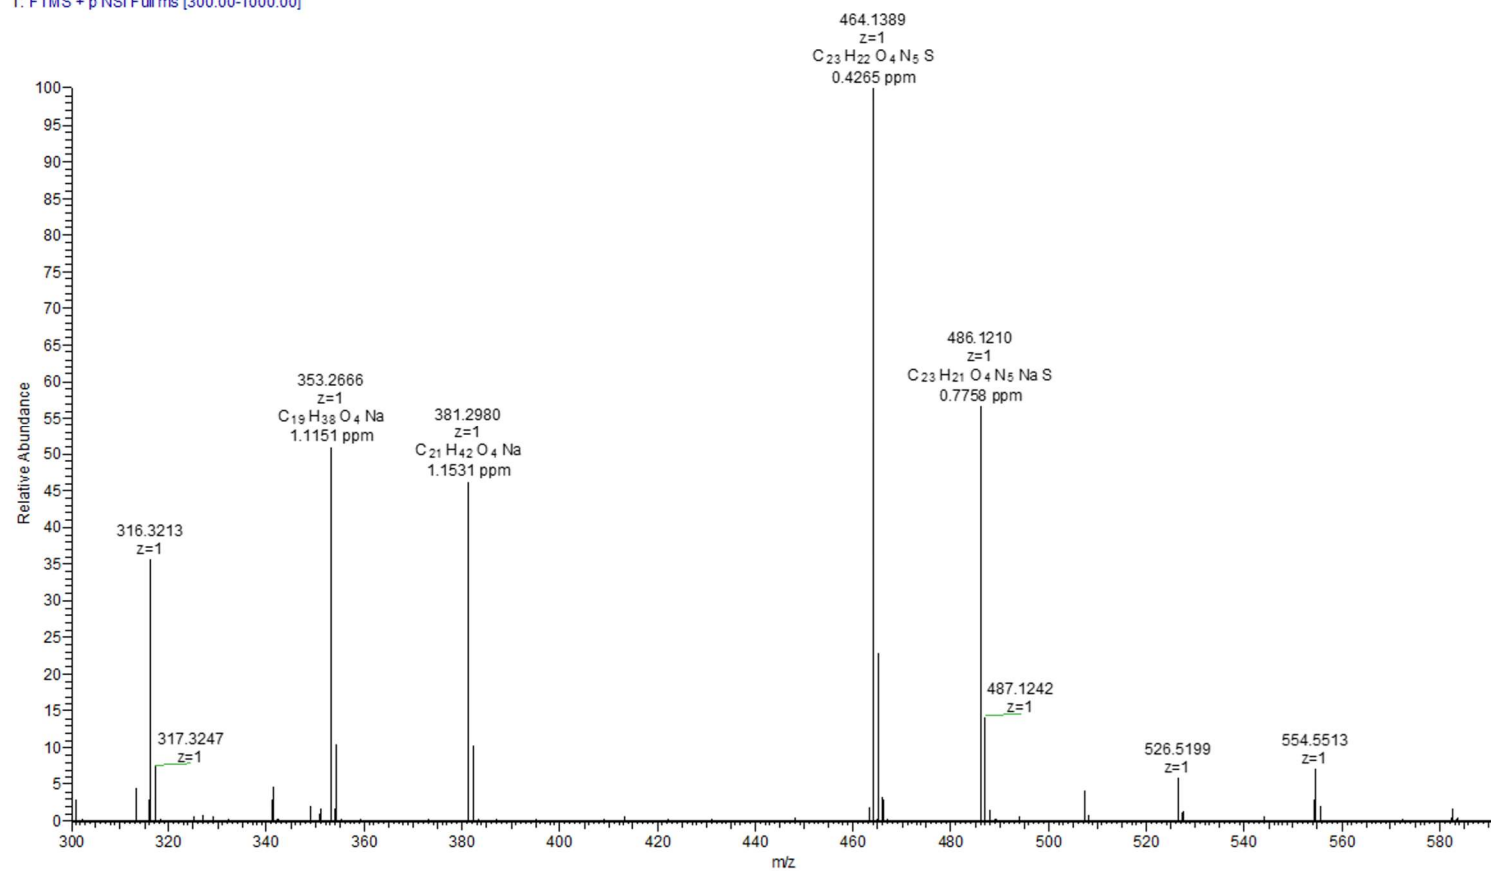

**Figure S39.** HRMS spectrum of compound **7d**.

## Supporting information

Ibrahim-SH-7-d 230130075252 #1-17 RT: 0.01-0.47 AV: 17 NL: 3.34E7  
T: FTMS + pNSI Full ms [300.00-1000.00]

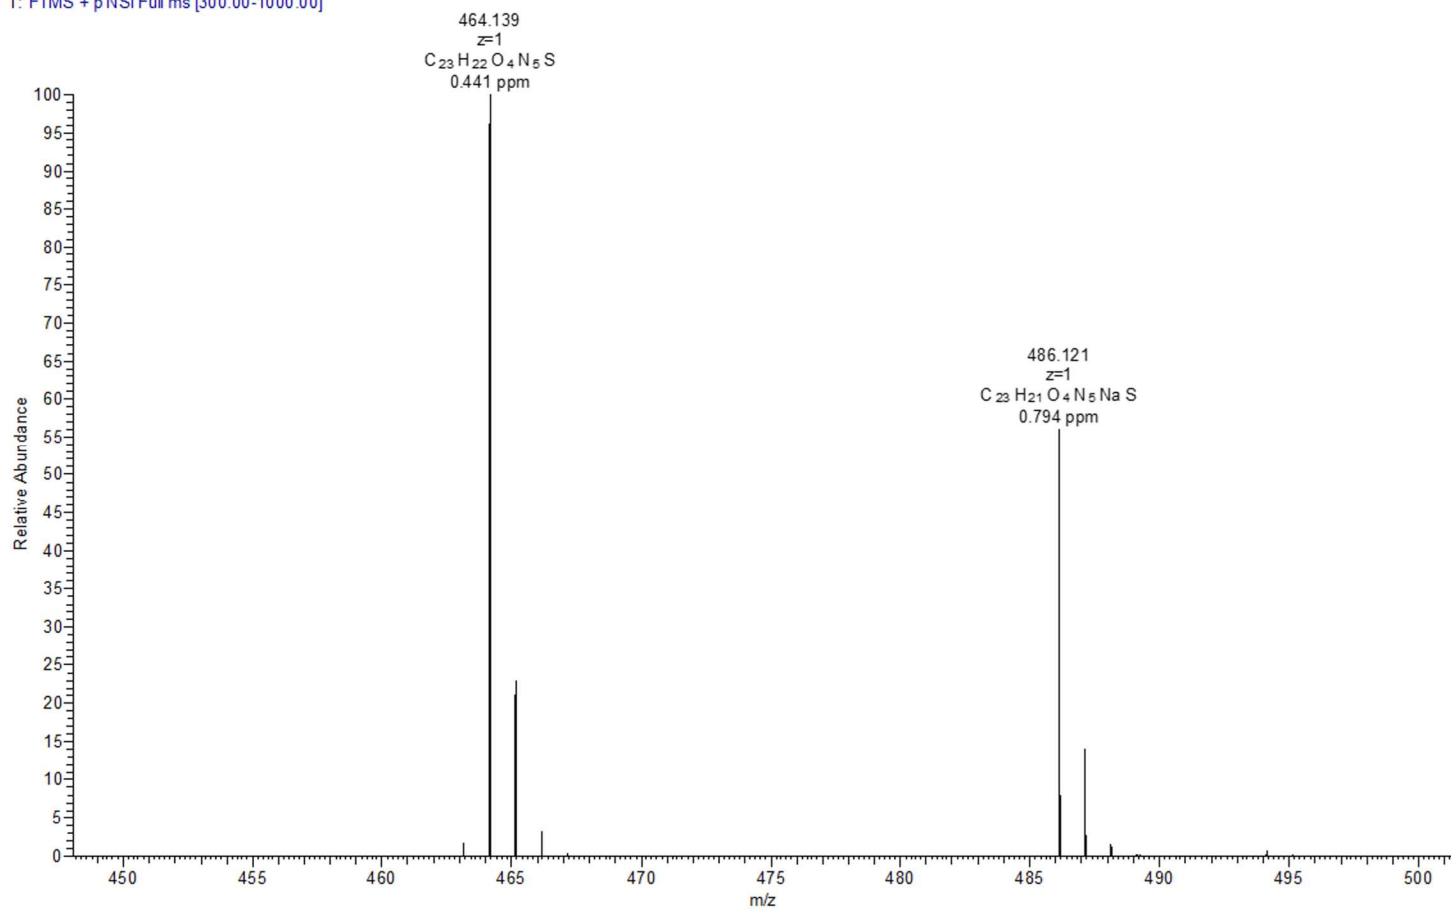

**Figure S40.** HRMS spectrum of compound **7d**.

## Supporting information

Ibrahim-SH-7-d-neq #1-17 RT: 0.01-0.45 AV: 17 NL: 3.84E6  
T: FTMS - p NSI Full ms [300.00-1000.00]

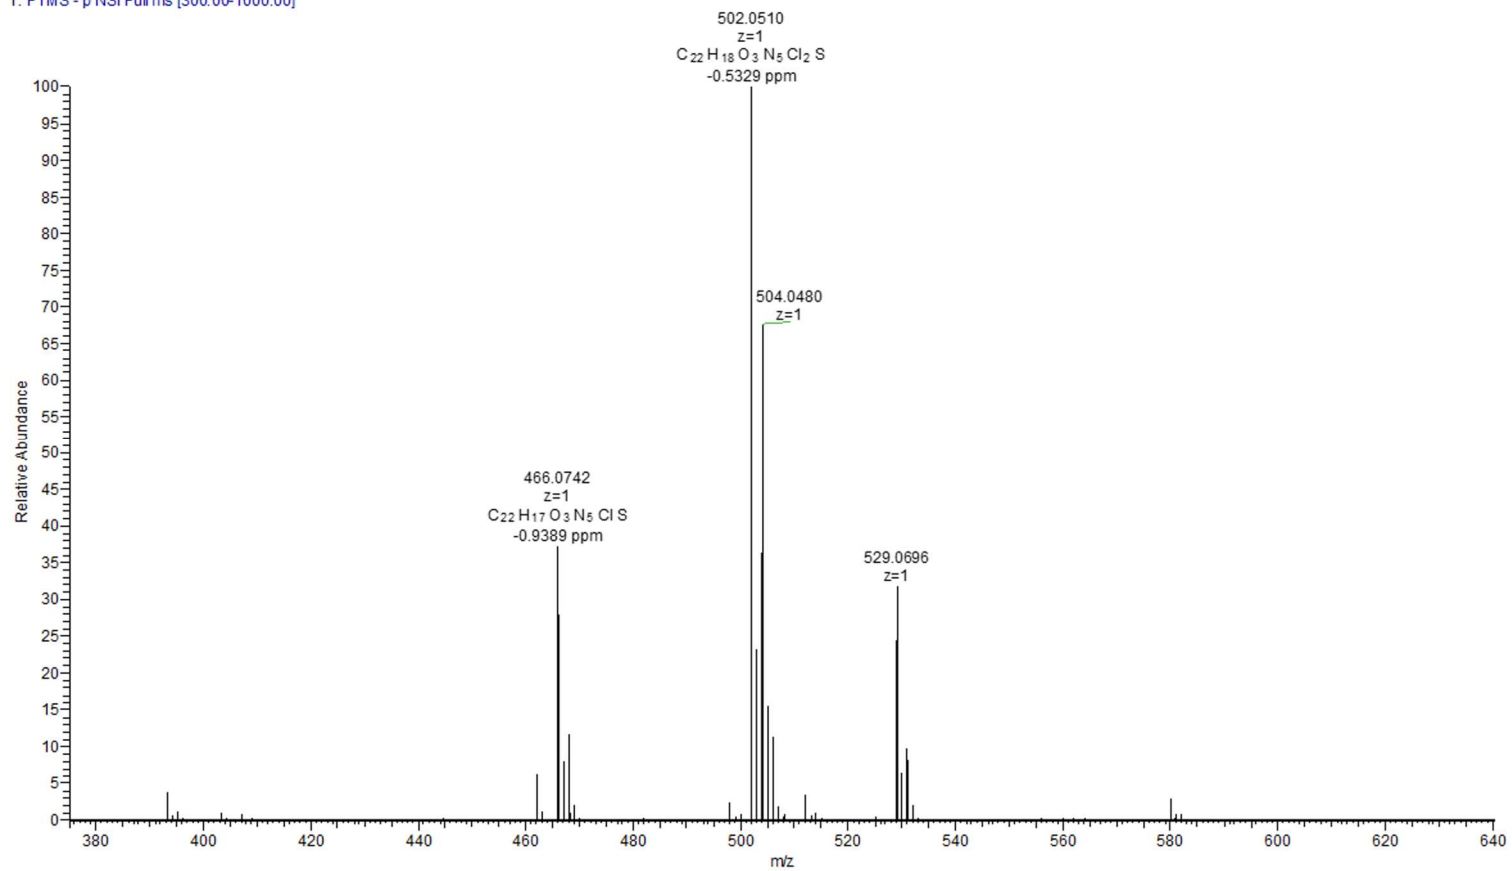

**Figure S41.** HRMS spectrum of compound **7d**.

Supporting information

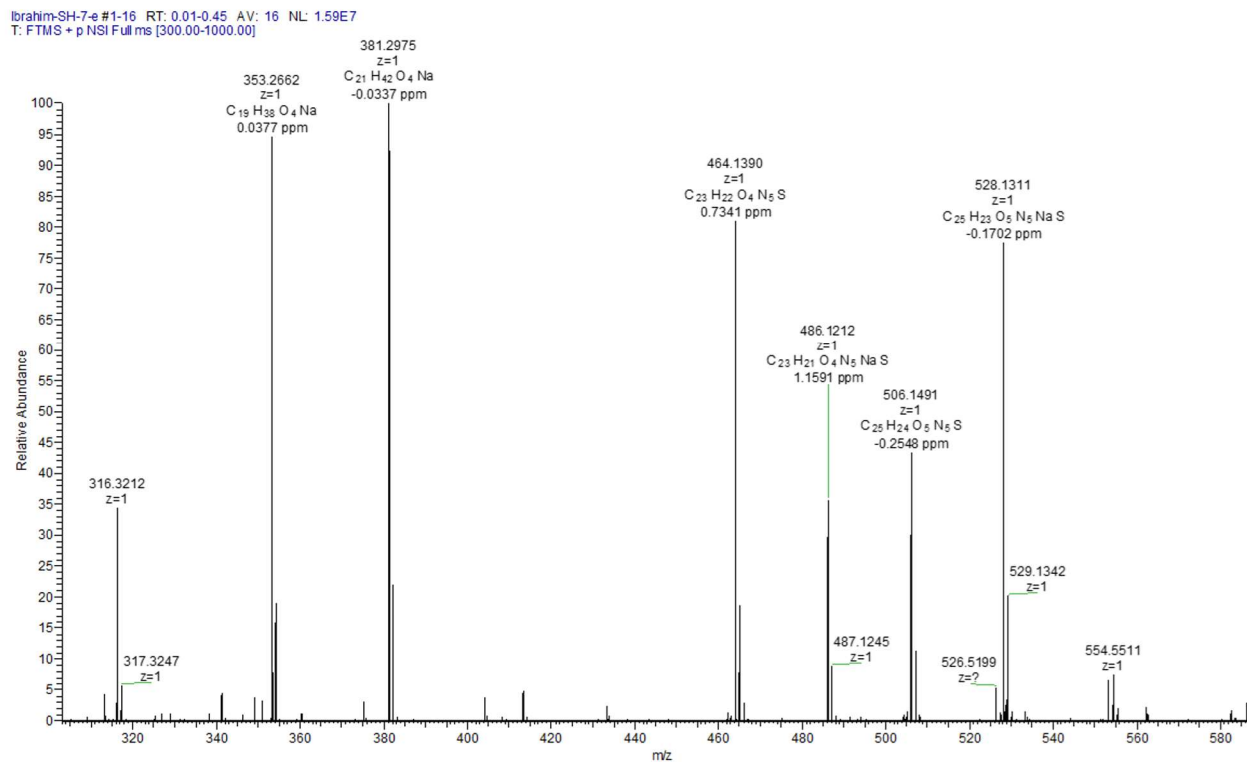

**Figure S42.** HRMS spectrum of compound **7e**.

## Supporting information

Ibrahim-SH-7-e #1-16 RT: 0.01-0.45 AV: 16 NL: 1.23E7  
T: FTMS + p NSI Full ms [300.00-1000.00]

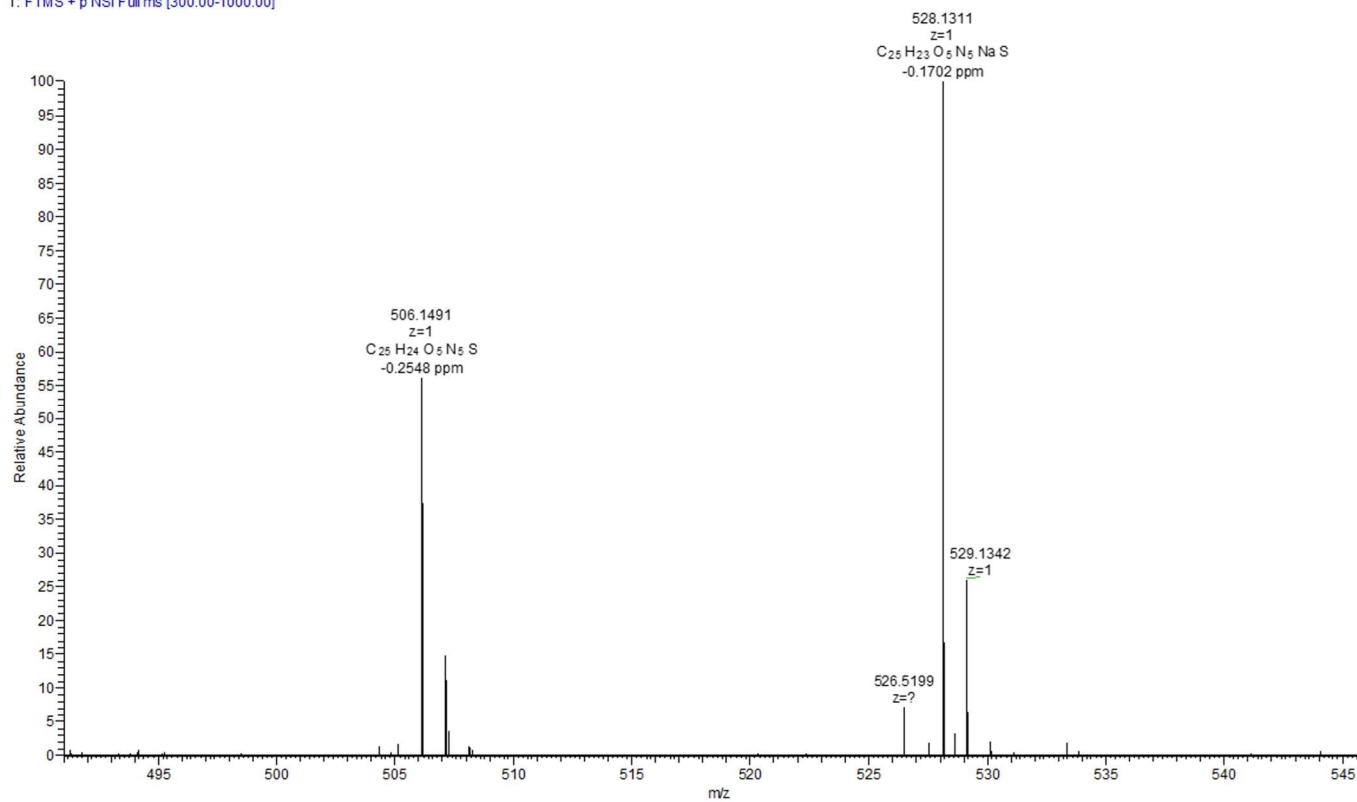

**Figure S43.** HRMS spectrum of compound **7e**.



Supporting information

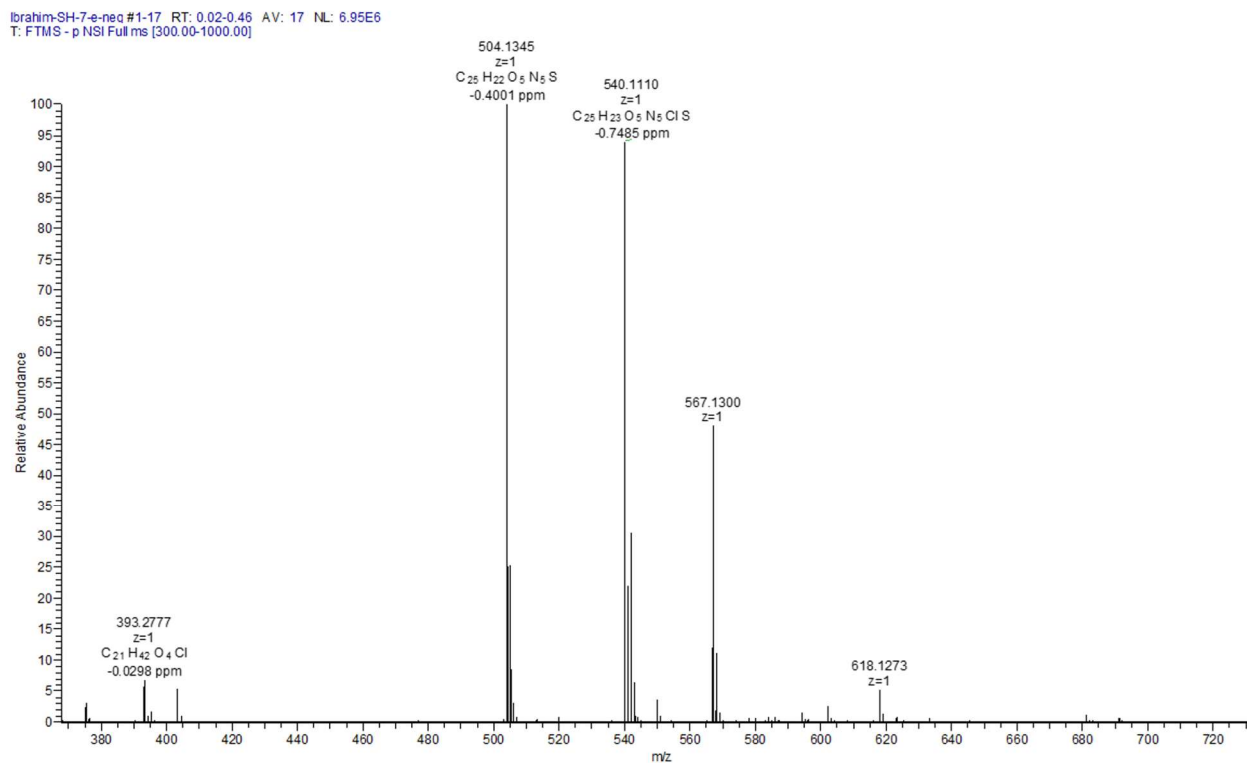

Figure S44. HRMS spectrum of compound 7e.

Supporting information

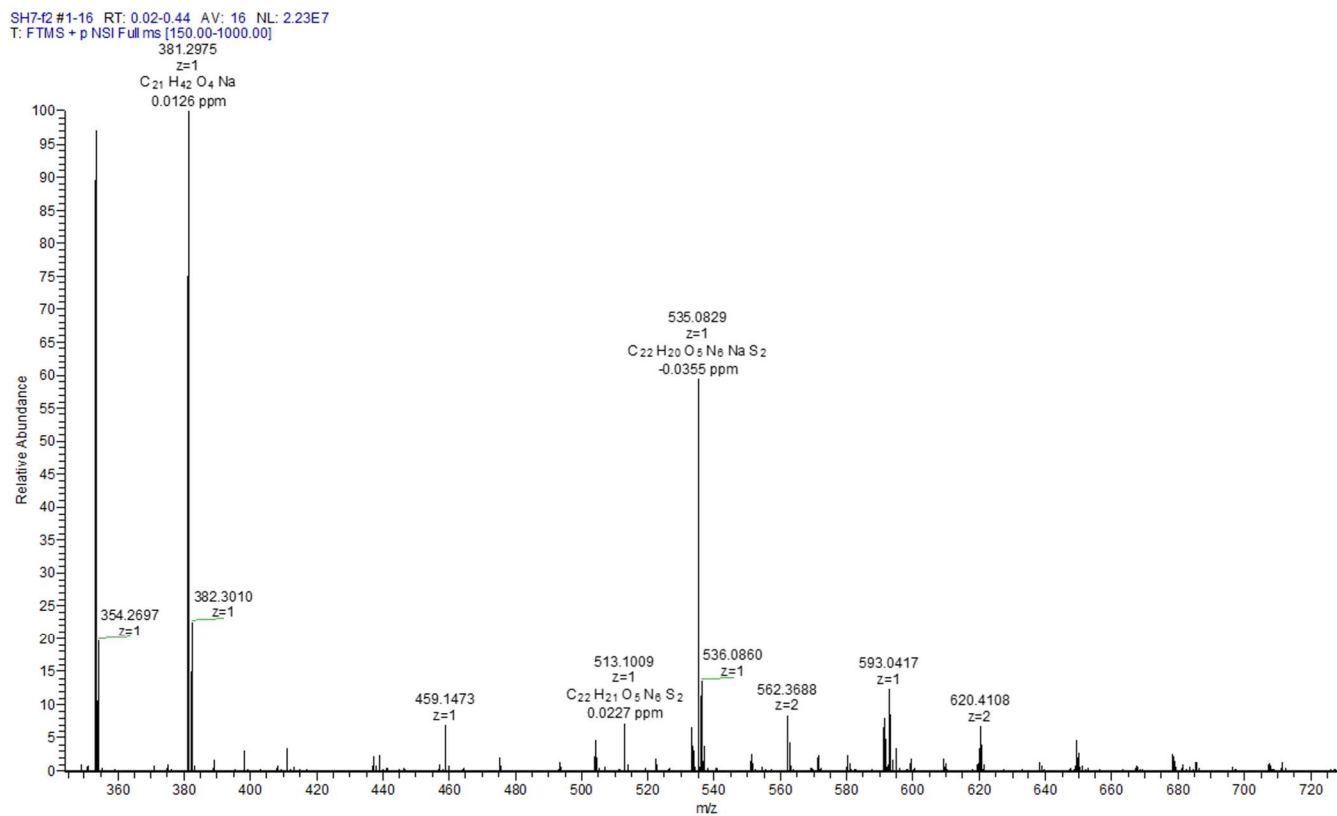

Figure S45. HRMS spectrum of compound 7f.

Supporting information

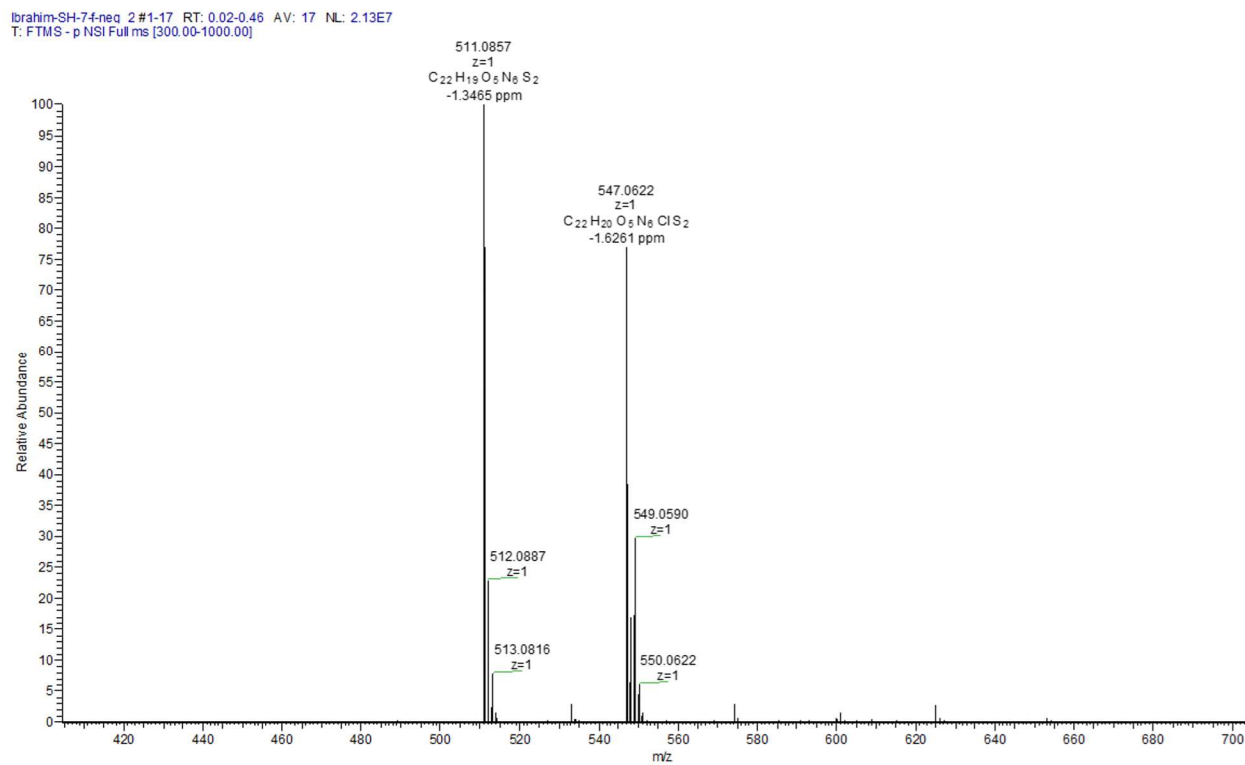

Figure S46. HRMS spectrum of compound **7f**.

# Supporting information

Ibrahim-SH-7-q 230130081225 #1-16 RT: 0.02-0.46 AV: 16 NL: 1.77E7  
T: FTMS + p NSI Full ms [300.00-1000.00]

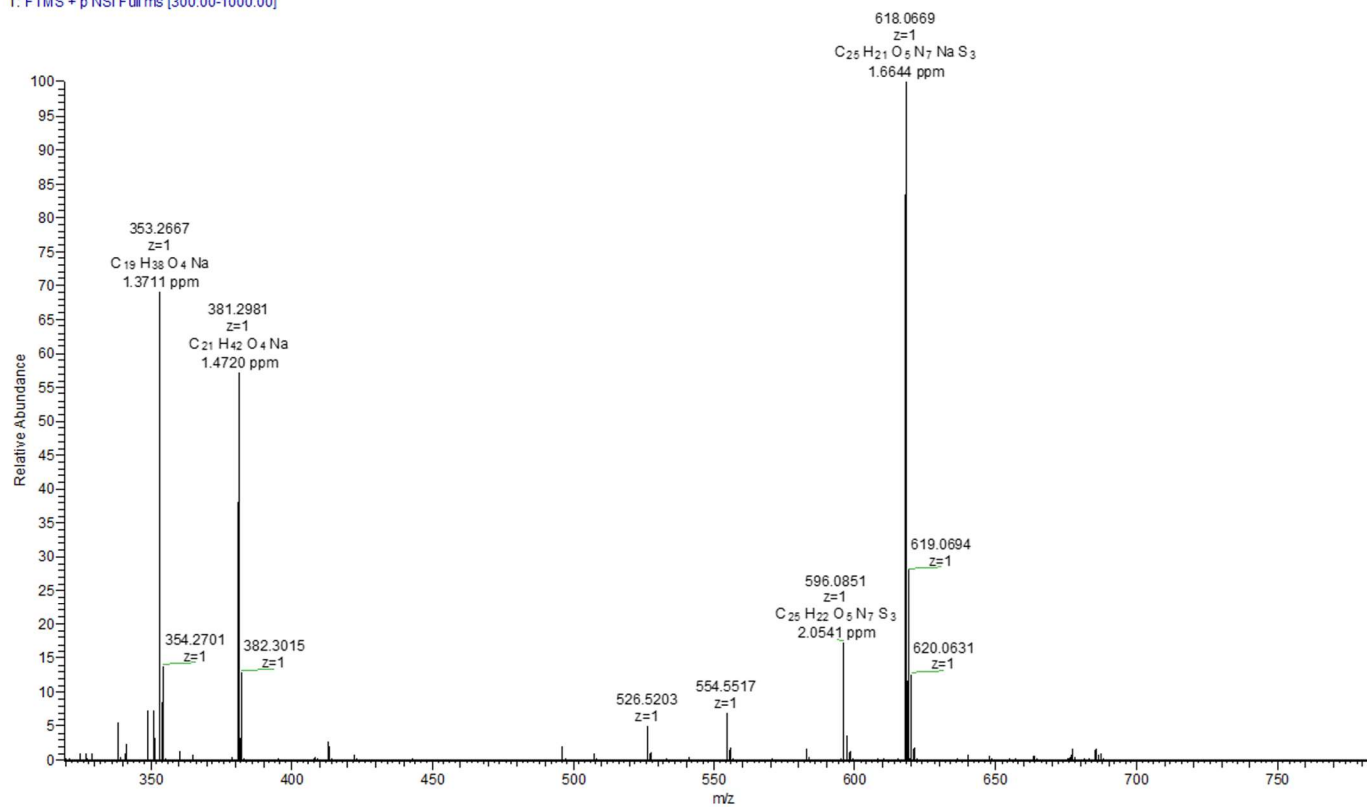

**Figure S47.** HRMS spectrum of compound **7g**.

## Supporting information

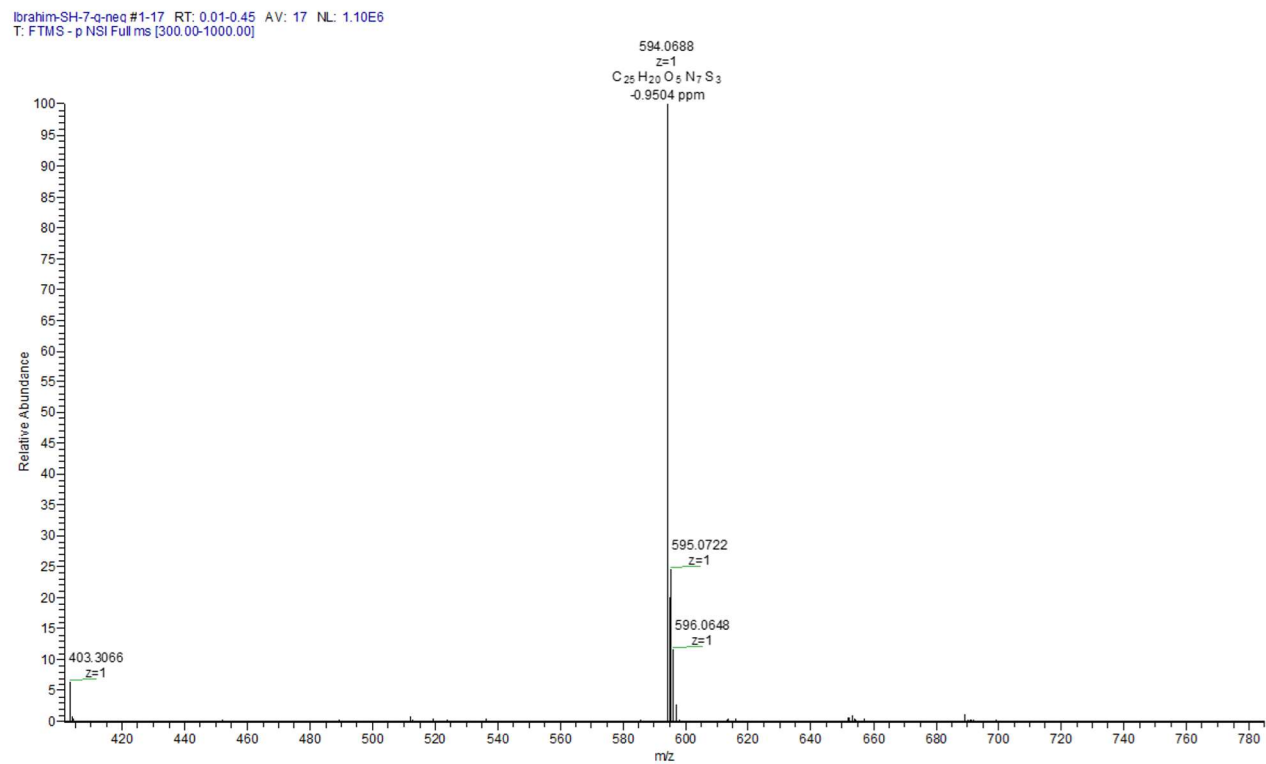

**Figure S48.** HRMS spectrum of compound **7g**.

Ibrahim-SH-7h 230130081229 #1-16 RT: 0.01-0.45 AV: 16 NL: 2.31E7  
T: FTMS + p NSI Full ms [300.00-1000.00]

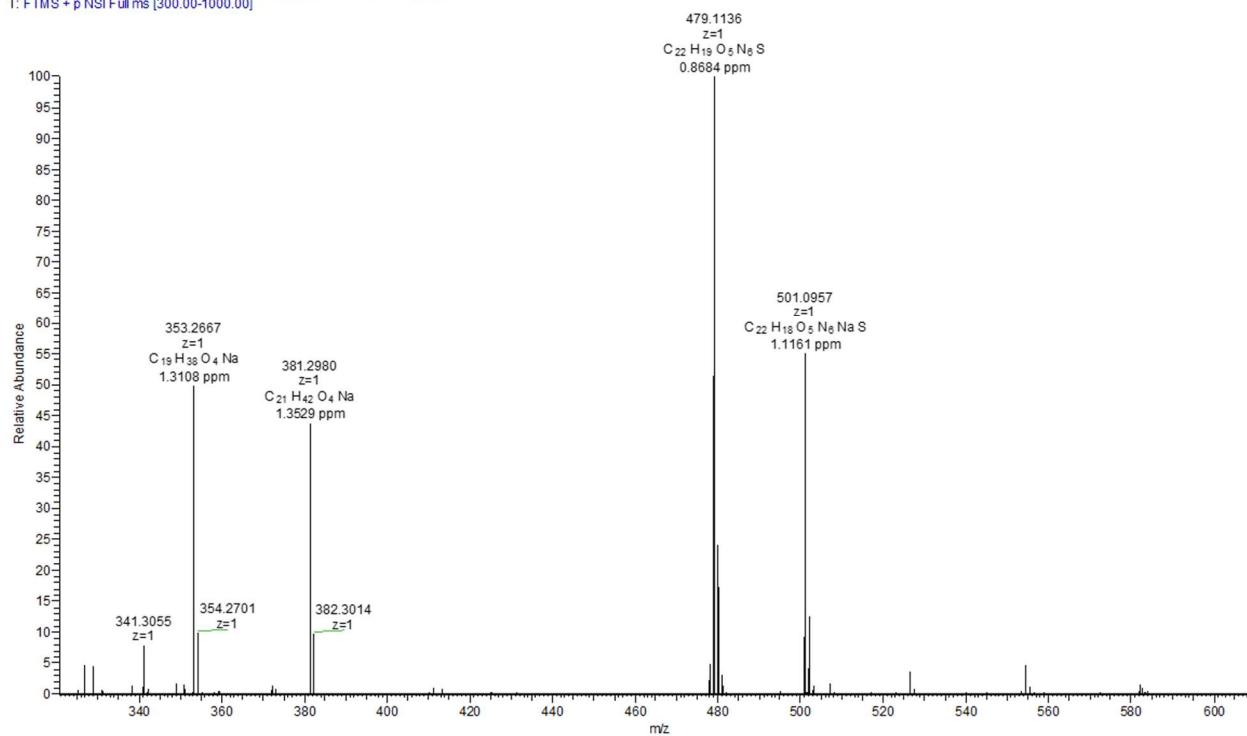

Figure S49. HRMS spectrum of compound 7h.

Supporting information

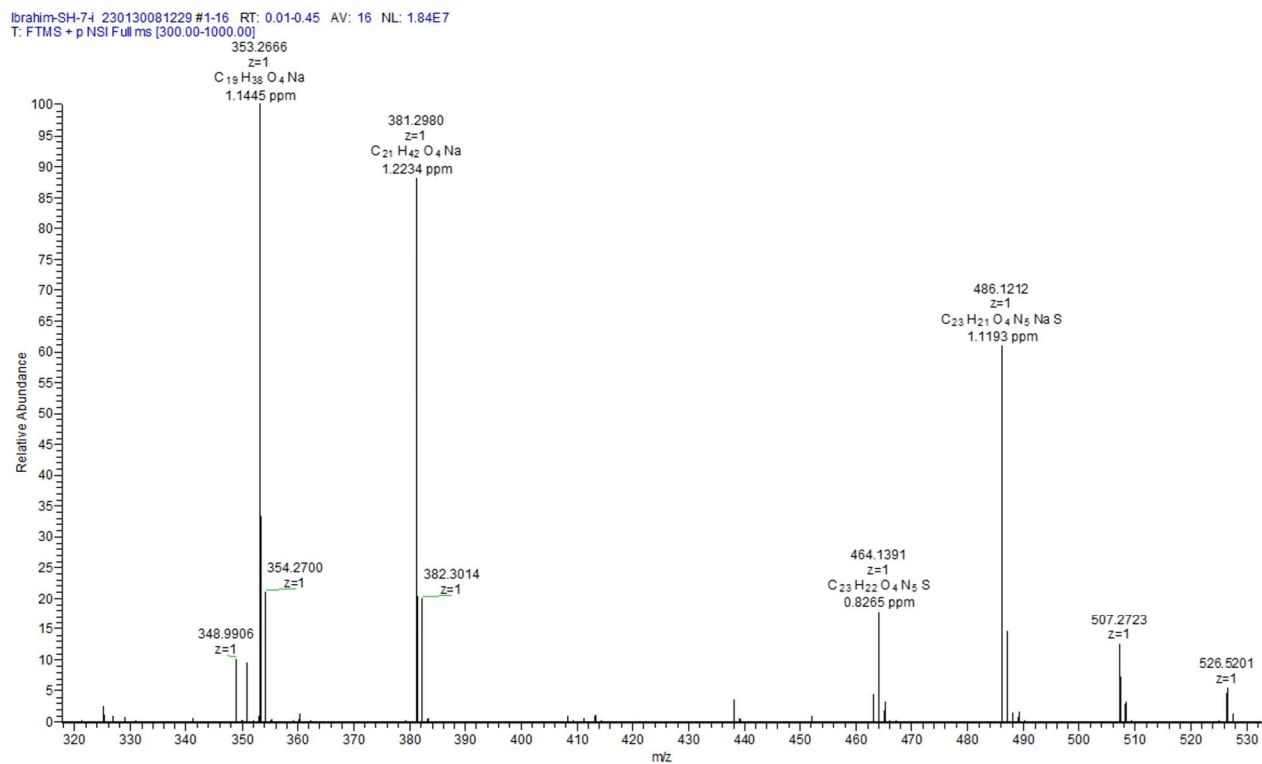

Figure S50. HRMS spectrum of compound **7i**.

## Supporting information

Ibrahim-SH-74-neq #1-17 RT: 0.02-0.47 AV: 17 NL: 9.24E5  
T: FTMS - p NSI Full ms [300.00-1000.00]

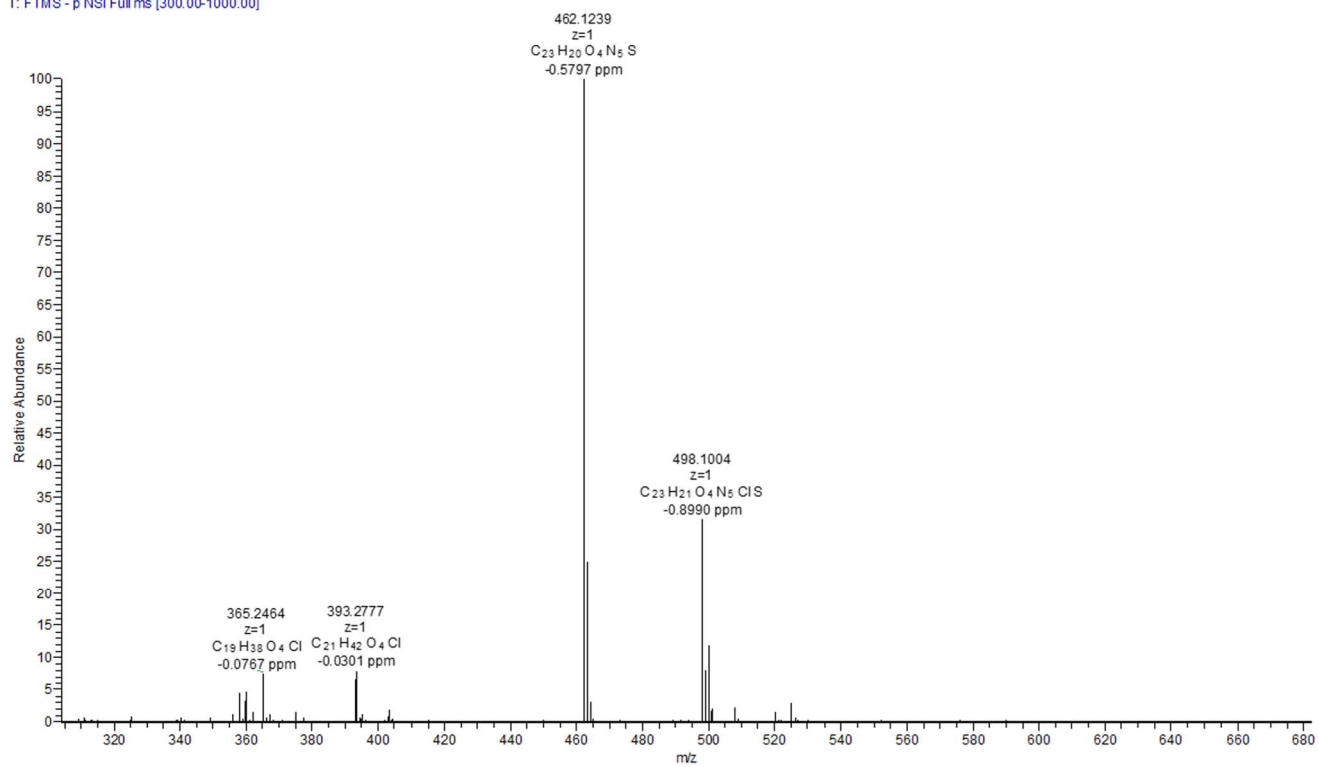

**Figure S51.** HRMS spectrum of compound **7i**.



Supporting information

Ibrahim-SH-7-i 230130081229 #1-16 RT: 0.02-0.45 AV: 16 NL: 1.56E7  
T: FTMS + p NSI Full ms [300.00-1000.00]

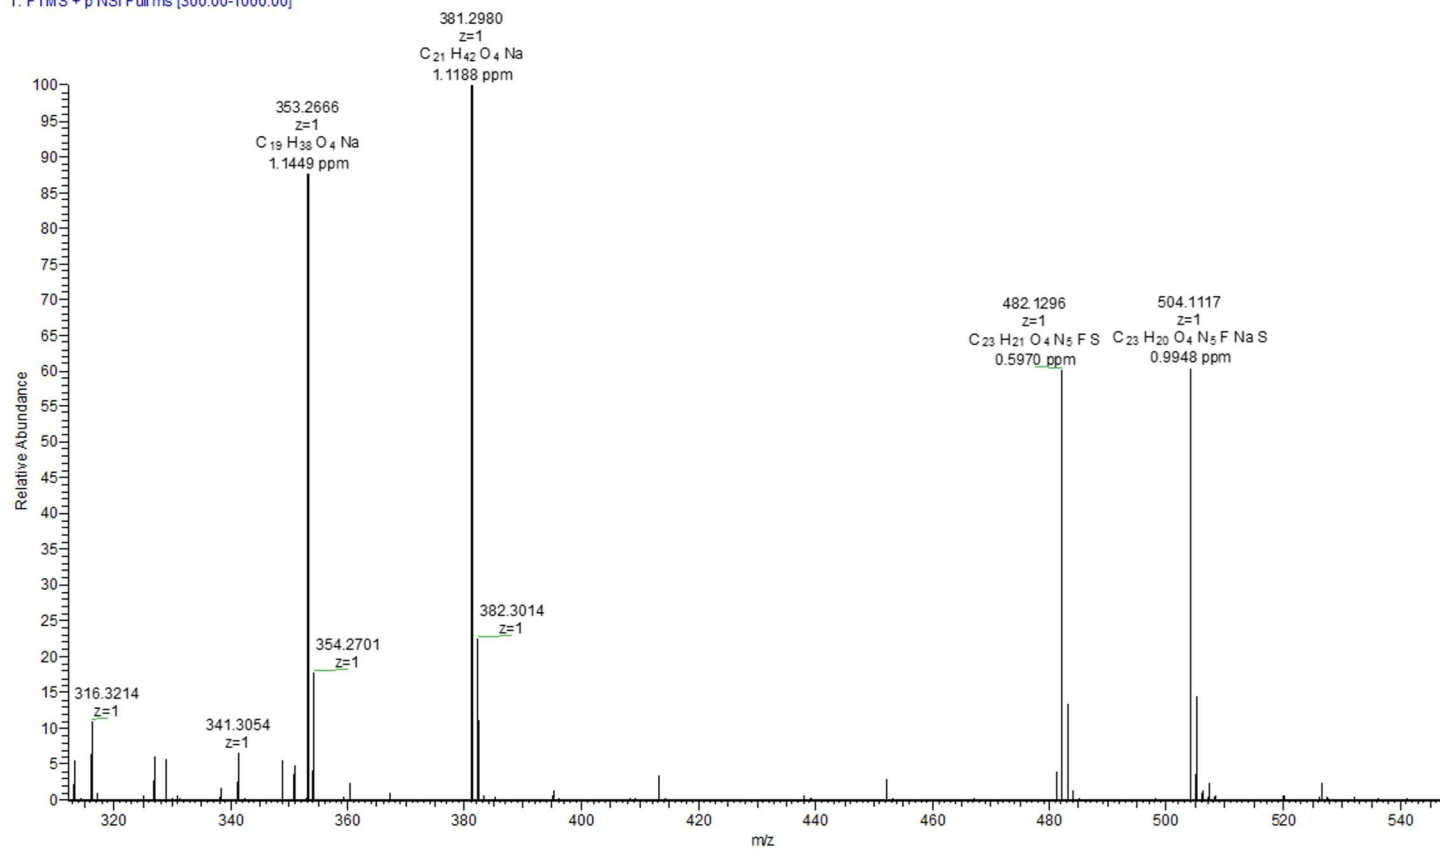

Figure S52. HRMS spectrum of compound 7i.

Supporting information

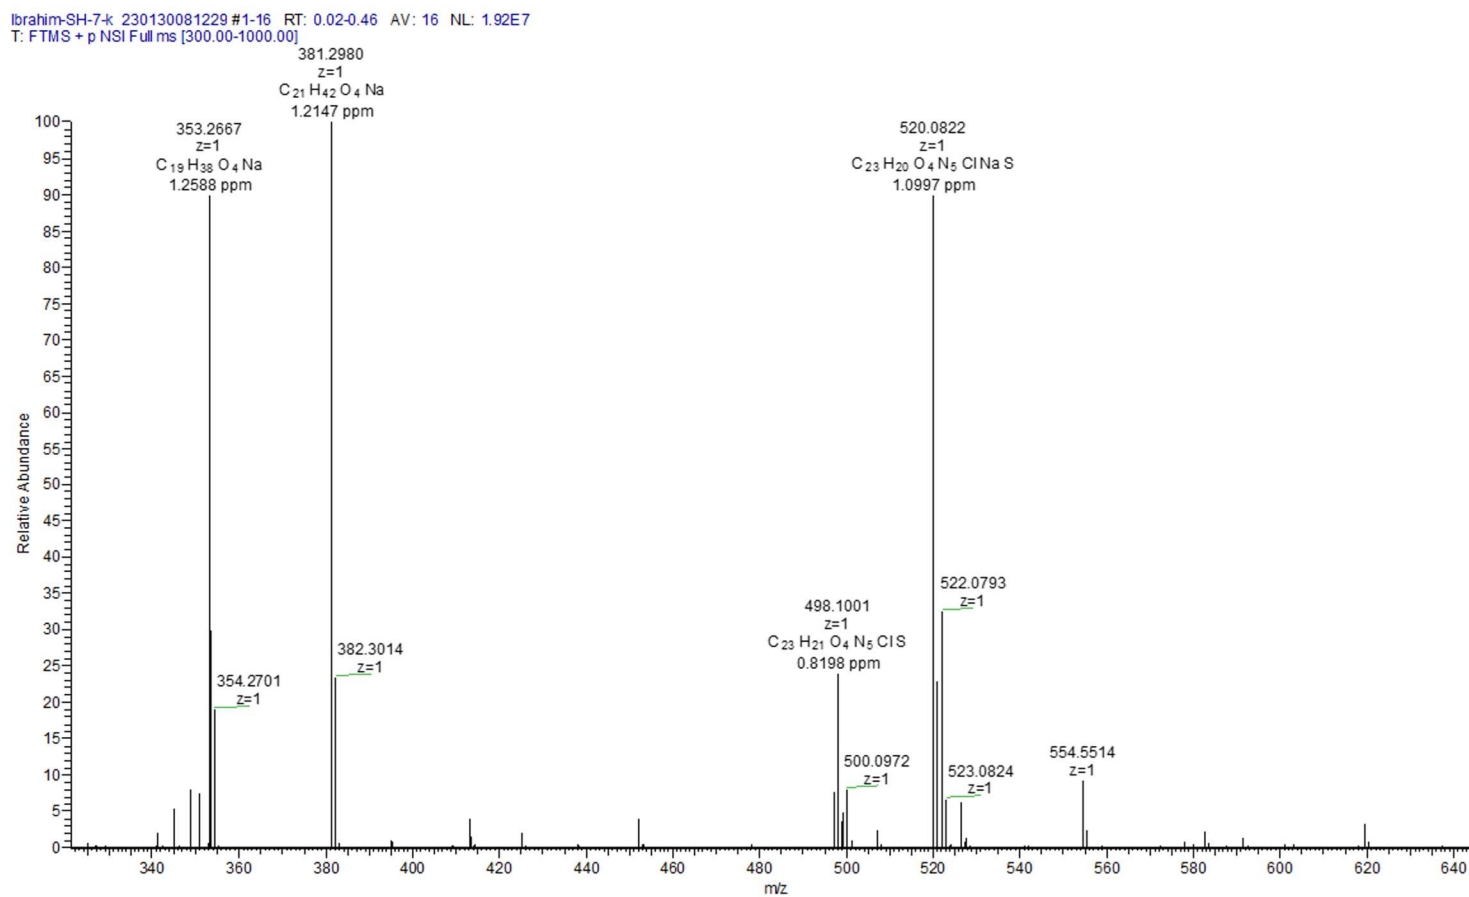

Figure S53. HRMS spectrum of compound 7k.

## Supporting information

Ibrahim-SH-7-k-neq #1-17 RT: 0.01-0.45 AV: 17 NL: 3.89E7  
T: FTMS - p NSI Full ms [300.00-1000.00]

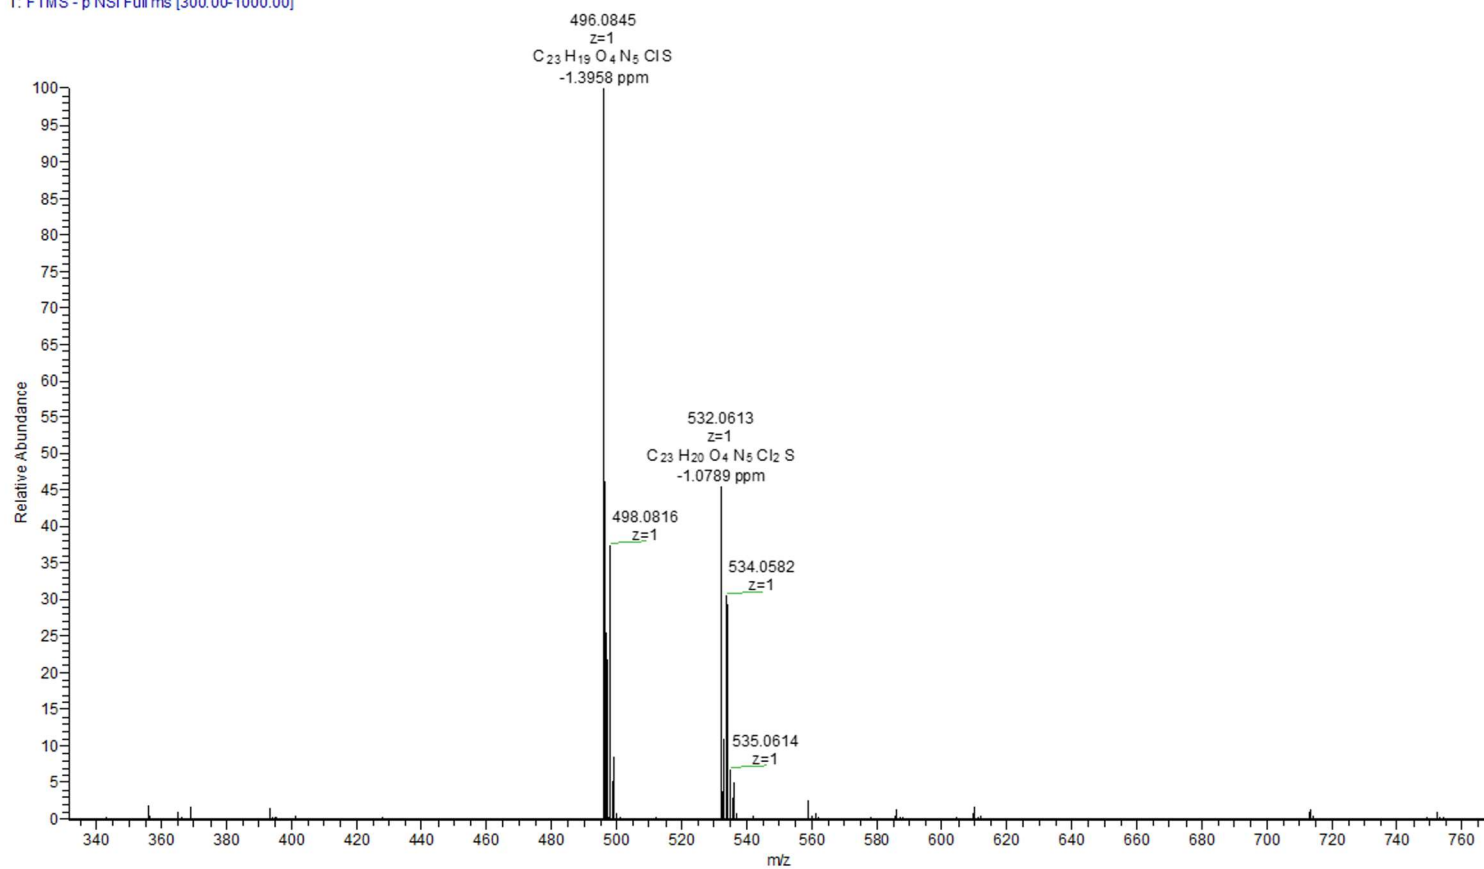

**Figure S54.** HRMS spectrum of compound **7k**.

# Supporting information

Ibrahim-SH-74 230130081229 #1-16 RT: 0.02-0.46 AV: 16 NL: 1.78E7  
T: FTMS + p NSI Full ms [300.00-1000.00]

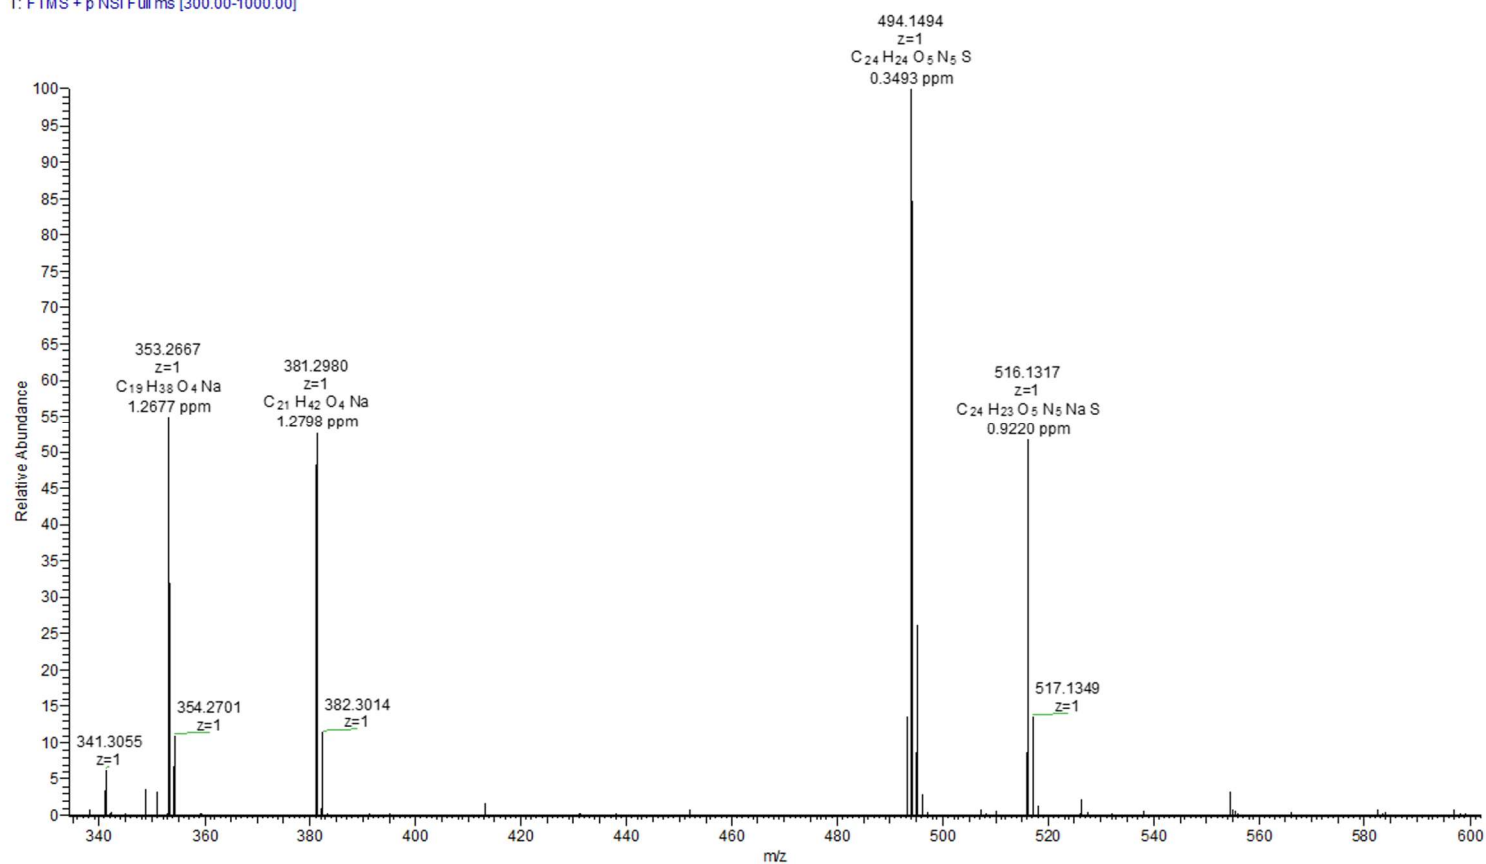

Figure S55. HRMS spectrum of compound 71.

## Supporting information

Ibrahim-SH-7-I 230130081229 #1-17 RT: 0.02-0.48 AV: 17 NL: 1.79E7  
T: FTMS + p NSI Full ms [300.00-1000.00]

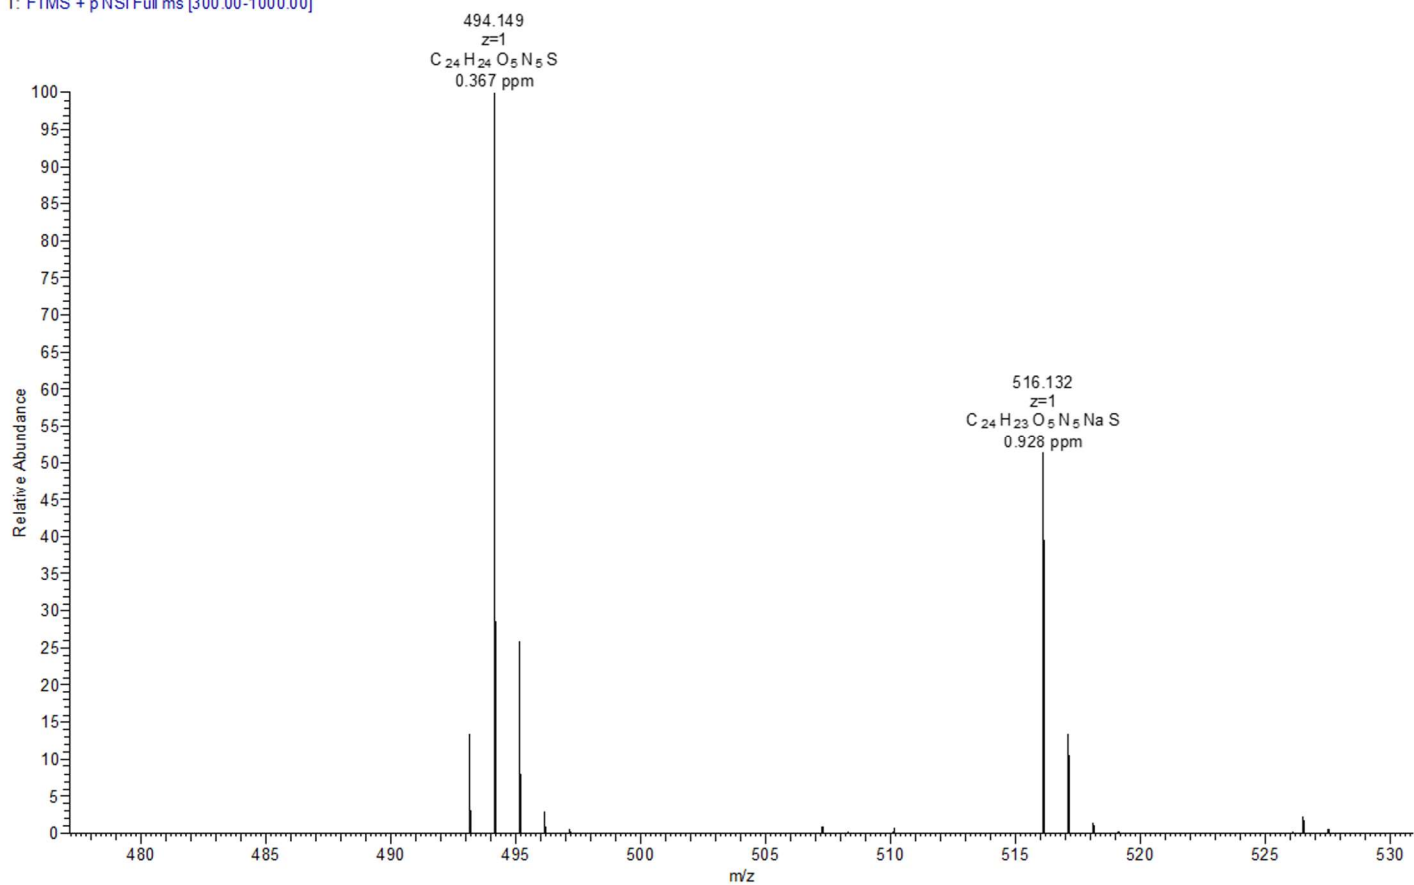

**Figure S56.** HRMS spectrum of compound **71**.

# Supporting information

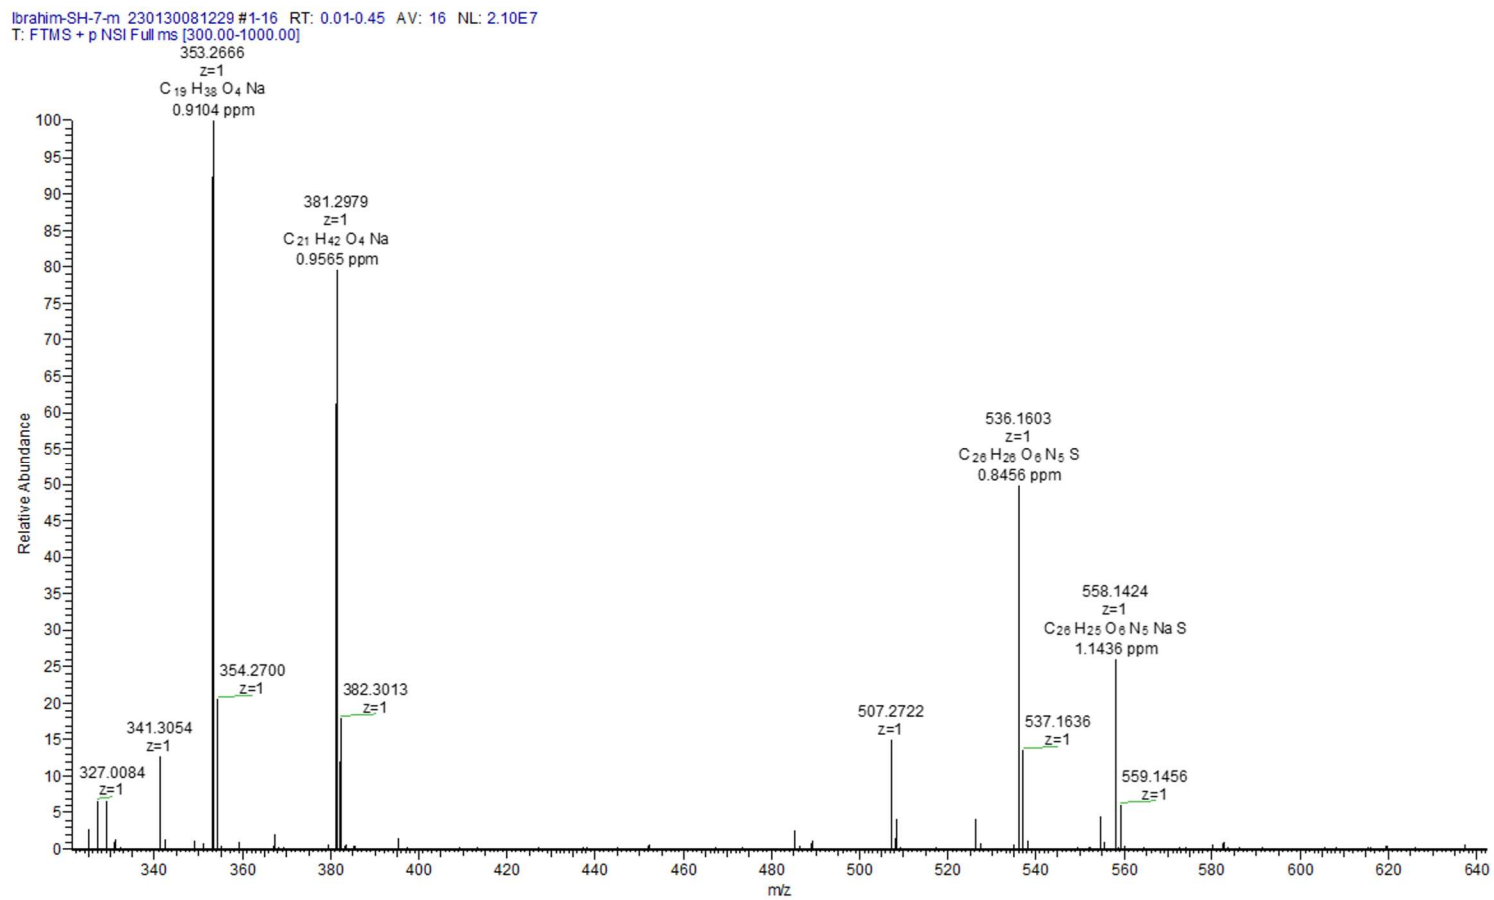

**Figure S57.** HRMS spectrum of compound **7m**.

## Supporting information

Ibrahim-SH-7-m-nec #1-17 RT: 0.01-0.45 AV: 17 NL: 9.28E5  
T: FTMS - p NSI Full ms [300.00-1000.00]

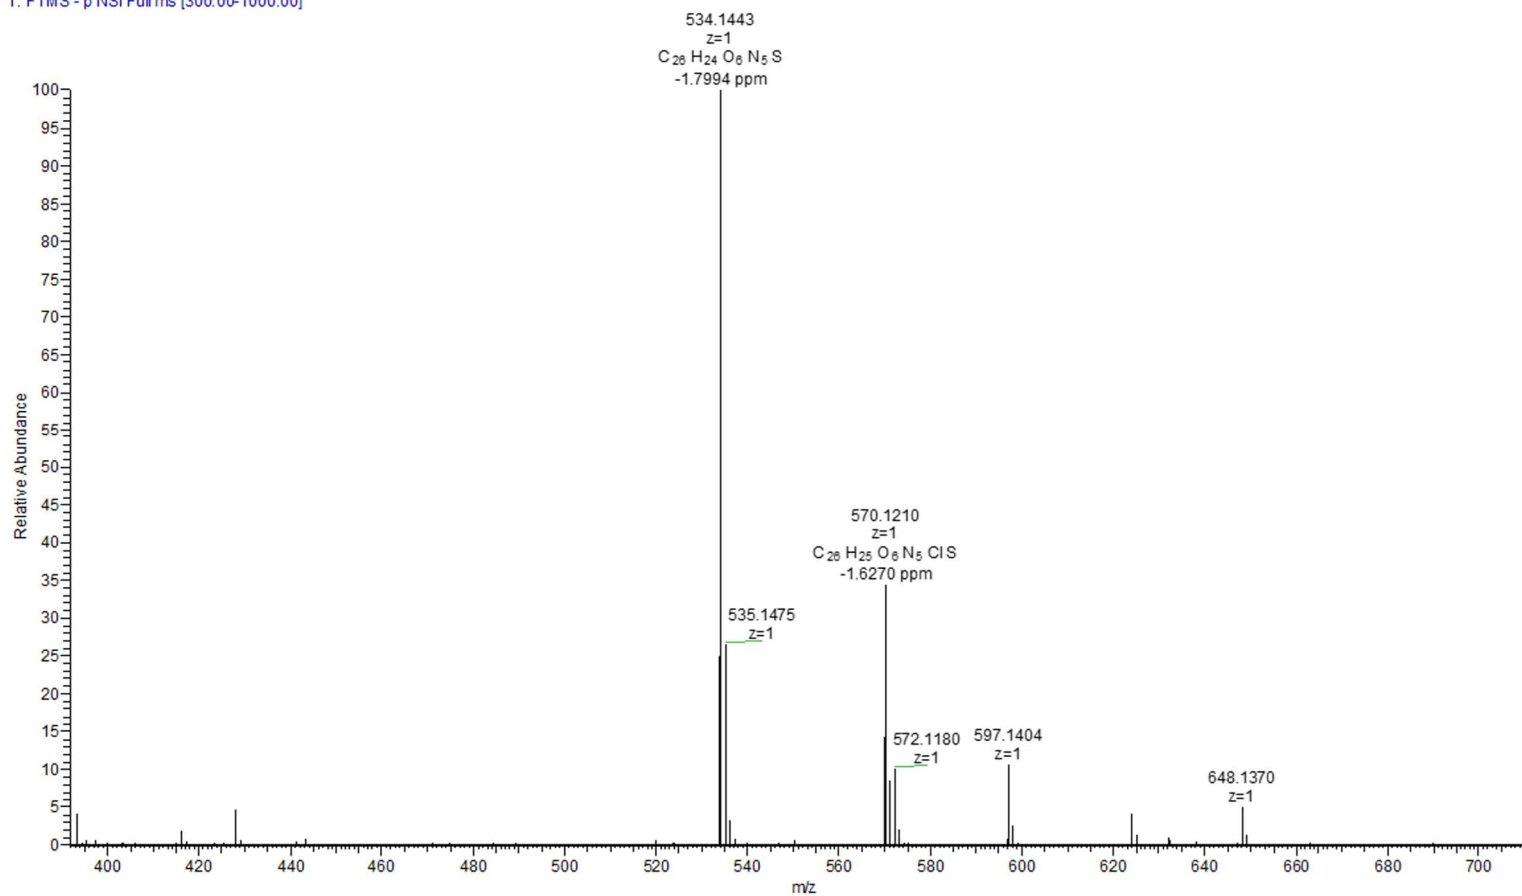

**Figure S58.** HRMS spectrum of compound **7m**.

Supporting information

Ibrahim-SH-7-n 230130081229 #1-16 RT: 0.02-0.45 AV: 16 NL: 1.95E7  
T: FTMS + p NSI Full ms [300.00-1000.00]

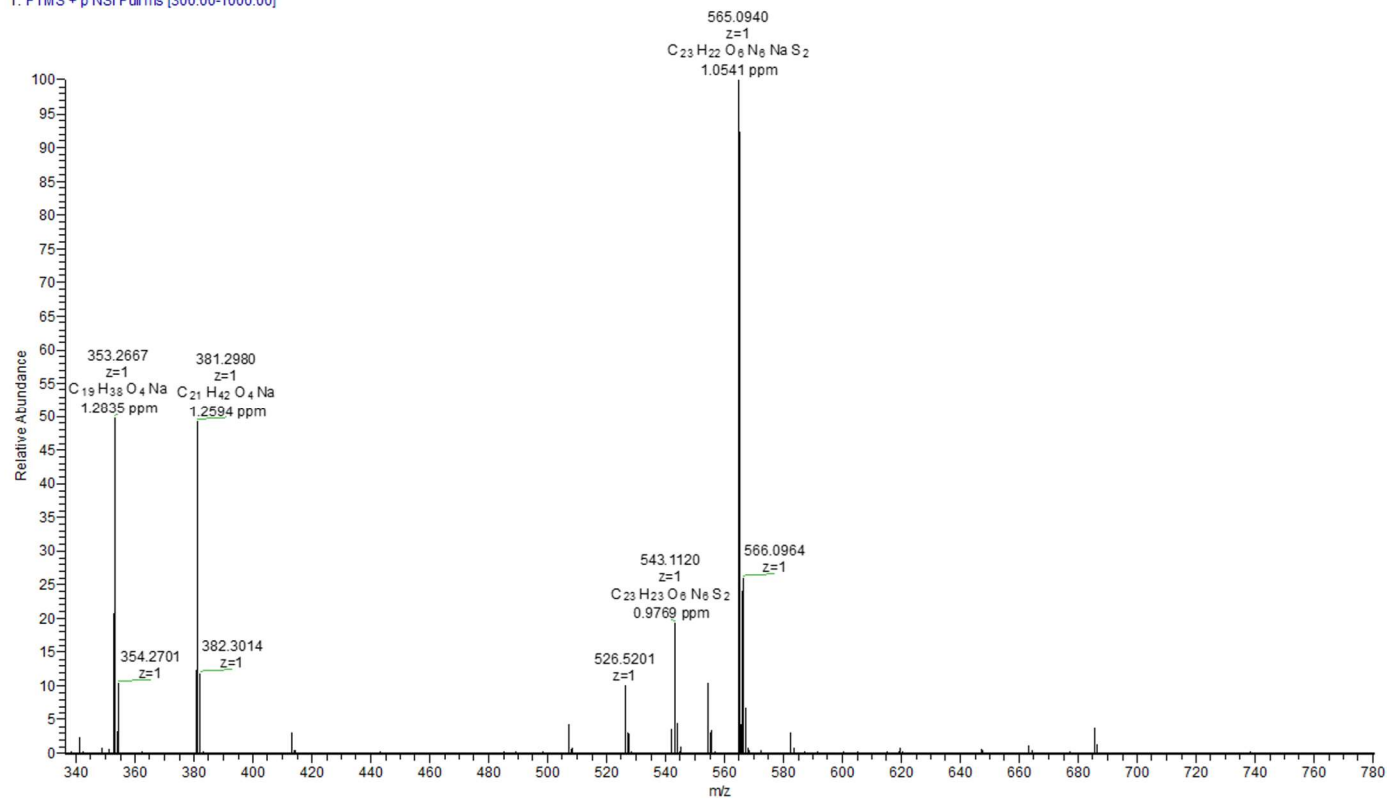

Figure S59. HRMS spectrum of compound 7n.



## Supporting information

Ibrahim-SH-7-n 230130081229 #1-17 RT: 0.02-0.48 AV: 17 NL: 1.95E7  
T: FTMS + p NSI Full ms [300.00-1000.00]

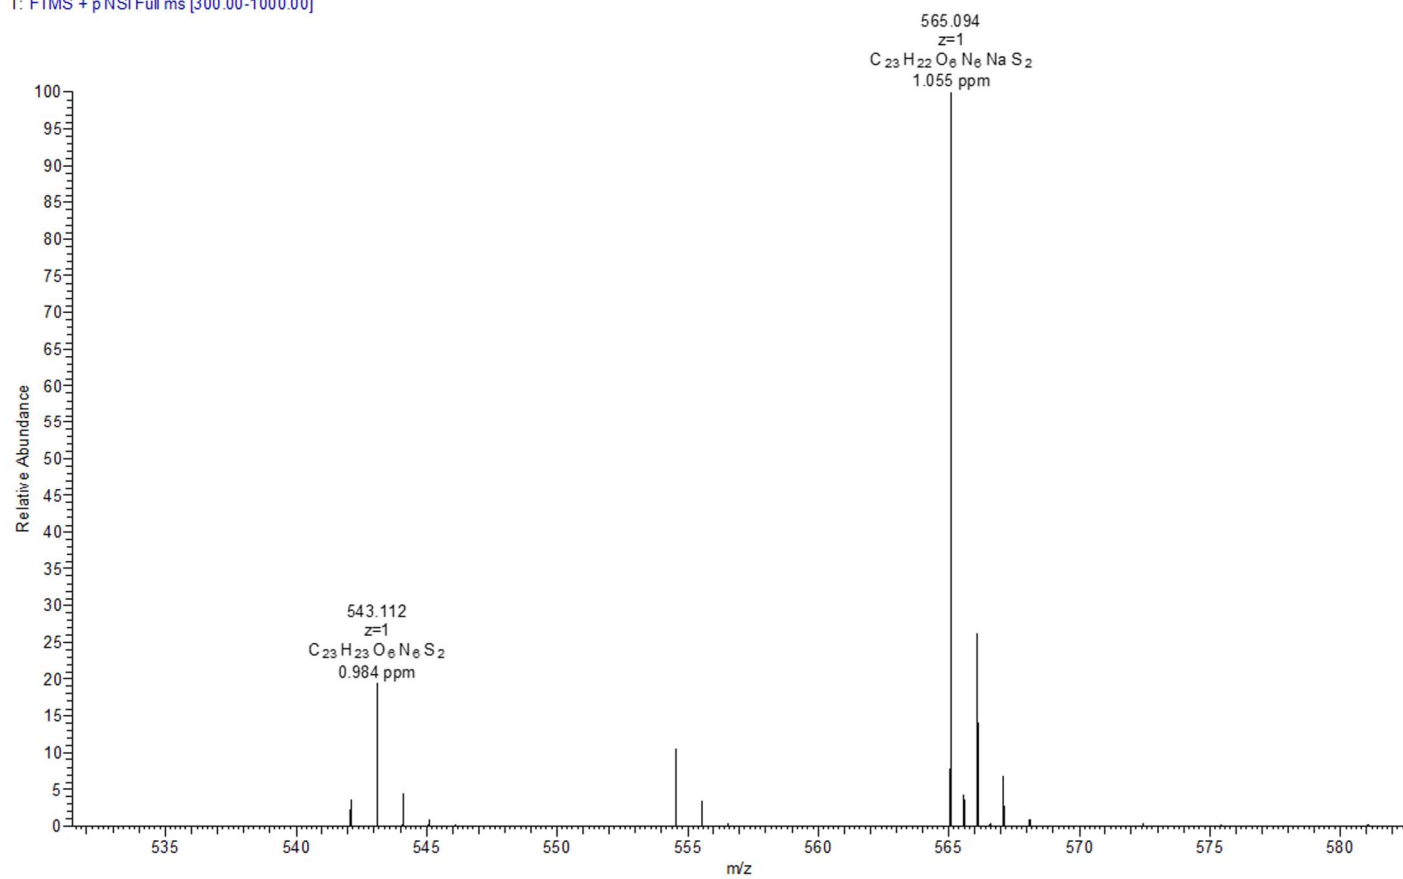

**Figure S60.** HRMS spectrum of compound **7n**.

## Supporting information

Ibrahim-SH-7-n-nec #1-17 RT: 0.02-0.47 AV: 17 NL: 4.25E7  
T: FTMS - p NSI Full ms [300.00-1000.00]

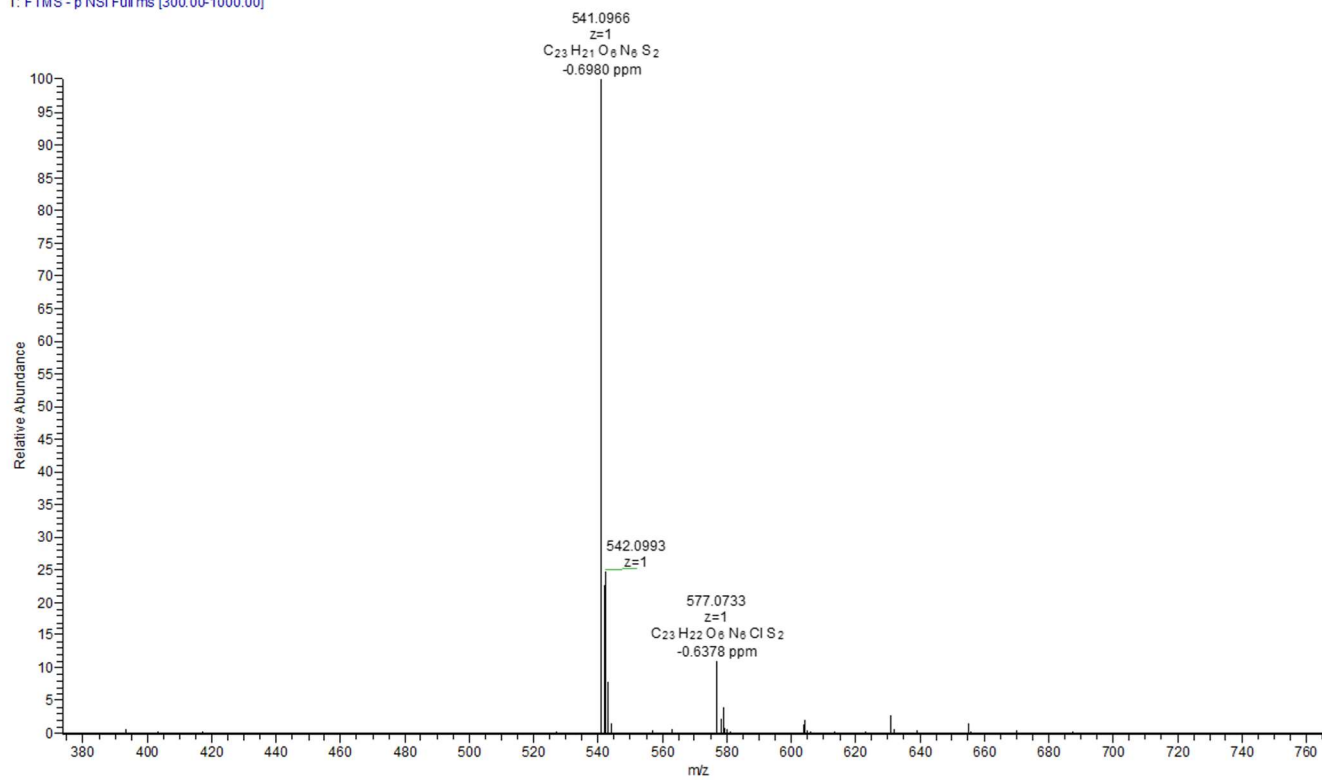

**Figure S61.** HRMS spectrum of compound **7n**.

# Supporting information

Ibrahim-SH-7-o #1-16 RT: 0.02-0.46 AV: 16 NL: 7.14E6  
T: FTMS + p NSI Full ms [300.00-1000.00]

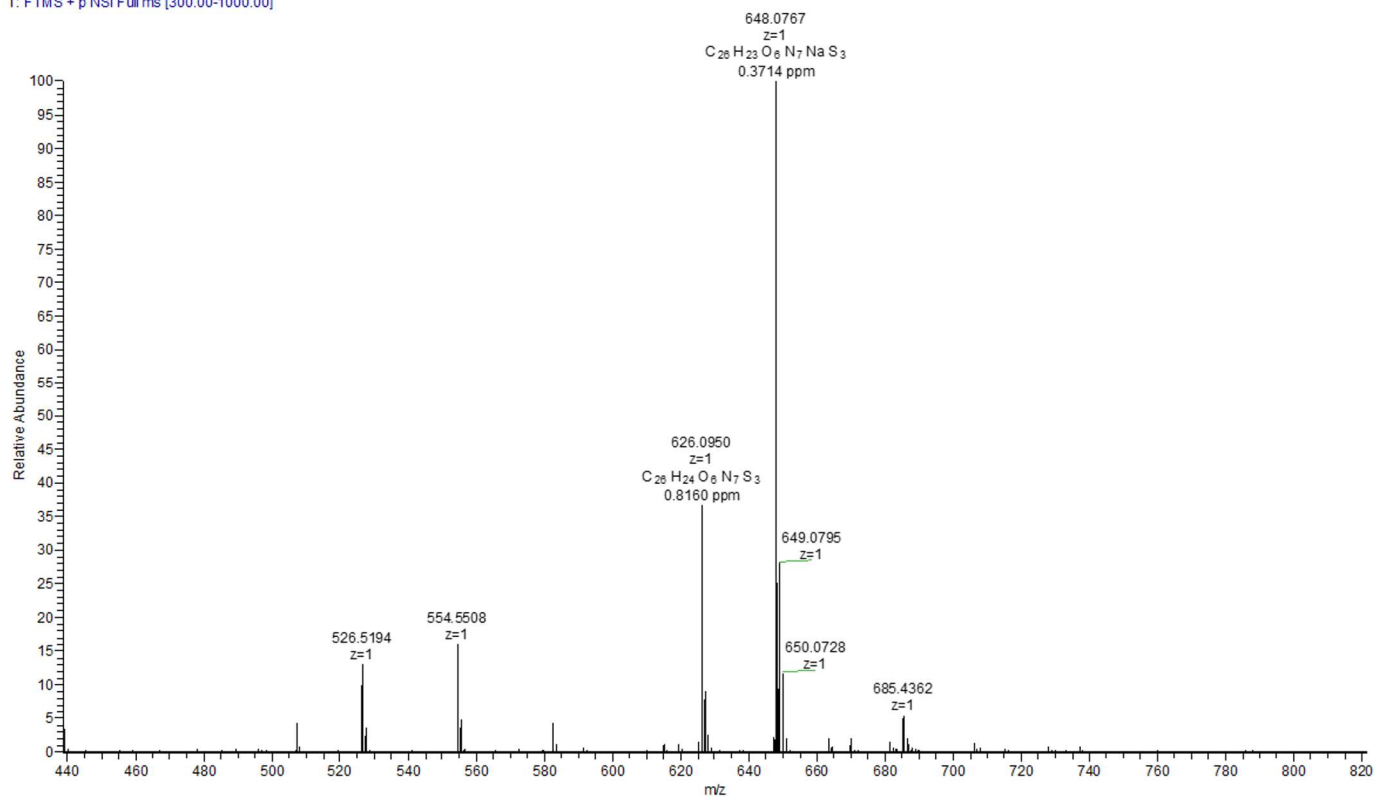

**Figure S62.** HRMS spectrum of compound **7o**.

## Supporting information

Ibrahim-SH-7-o-neq #1-17 RT: 0.01-0.45 AV: 17 NL: 1.20E6  
T: FTMS - p NSI Full ms [300.00-1000.00]

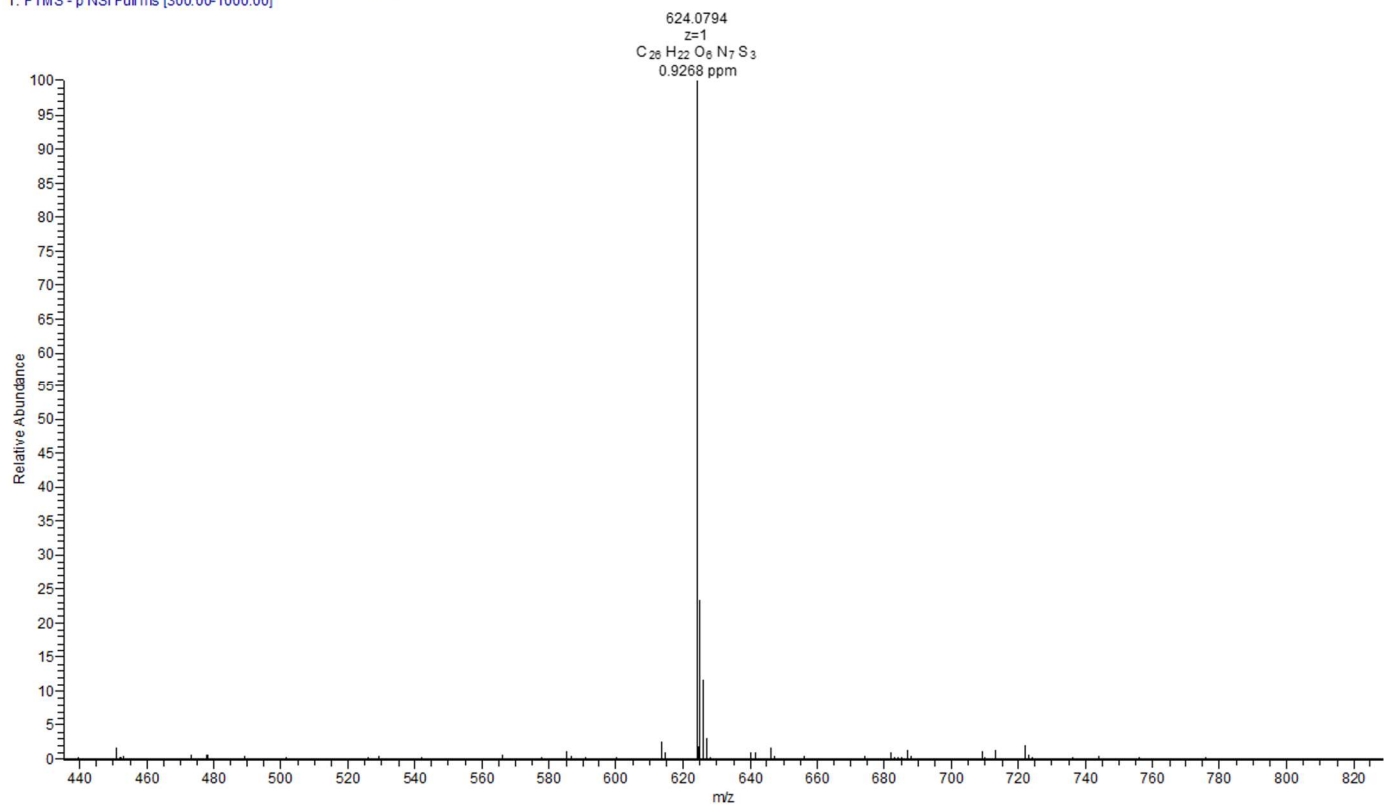

**Figure S63.** HRMS spectrum of compound **70**.

Supporting information

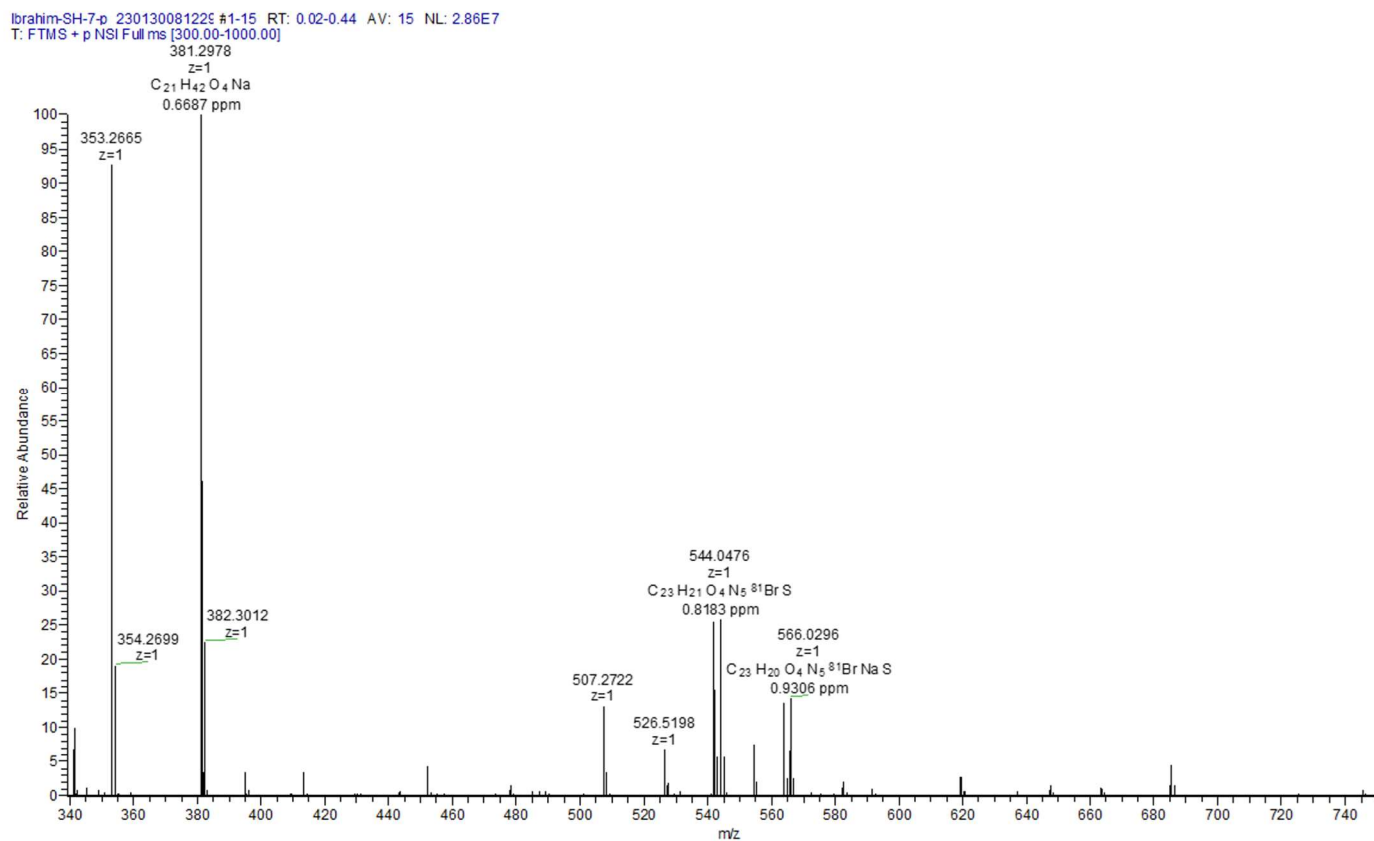

Figure S64. HRMS spectrum of compound 7p.

# Supporting information

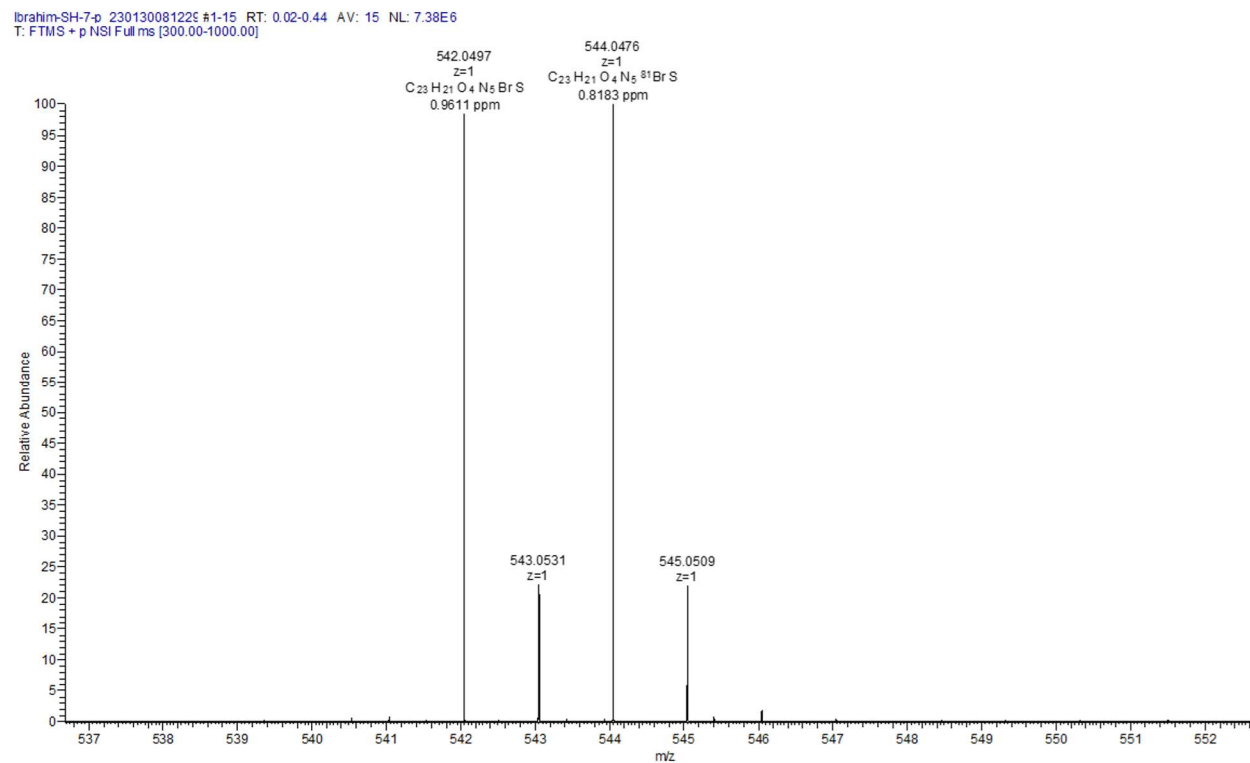

**Figure S65.** HRMS spectrum of compound **7p**.

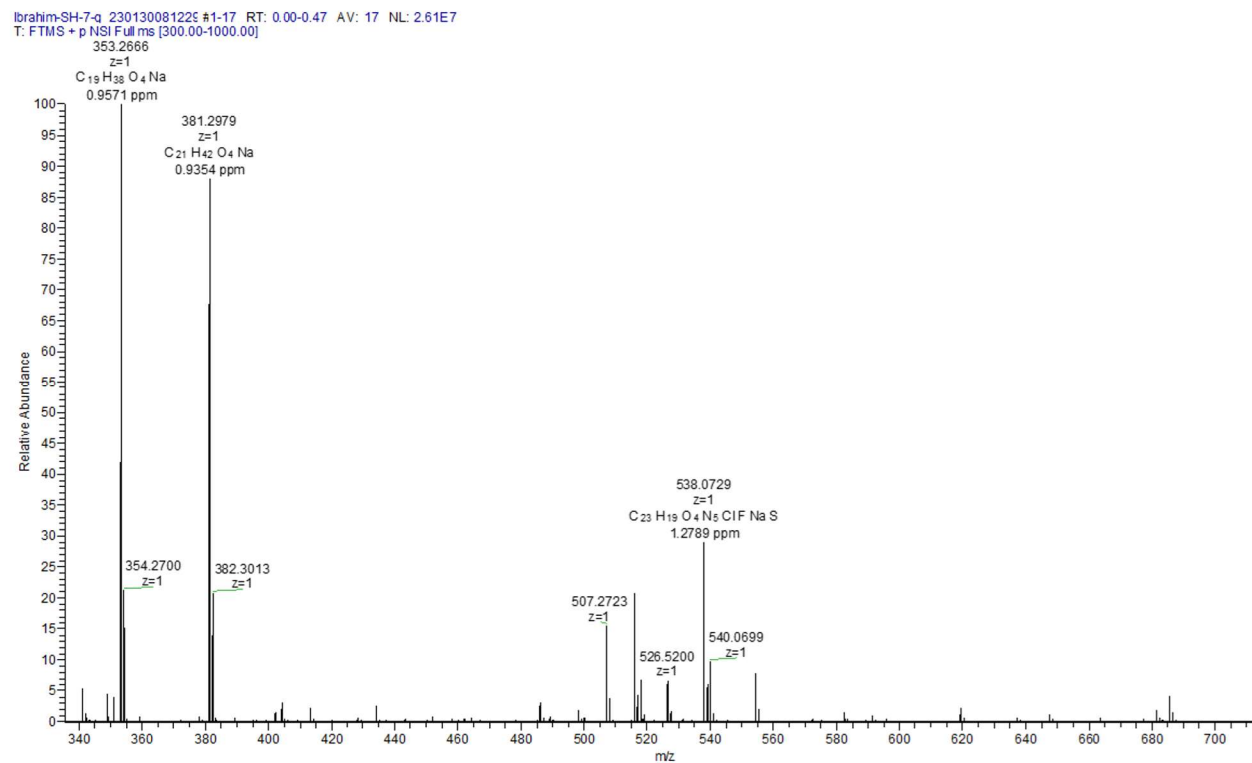

Figure S66. HRMS spectrum of compound 7q.

## Supporting information

Ibrahim-SH-7-q 230130081225 #1-17 RT: 0.00-0.47 AV: 17 NL: 7.54E6  
T: FTMS + p NSI Full ms [300.00-1000.00]

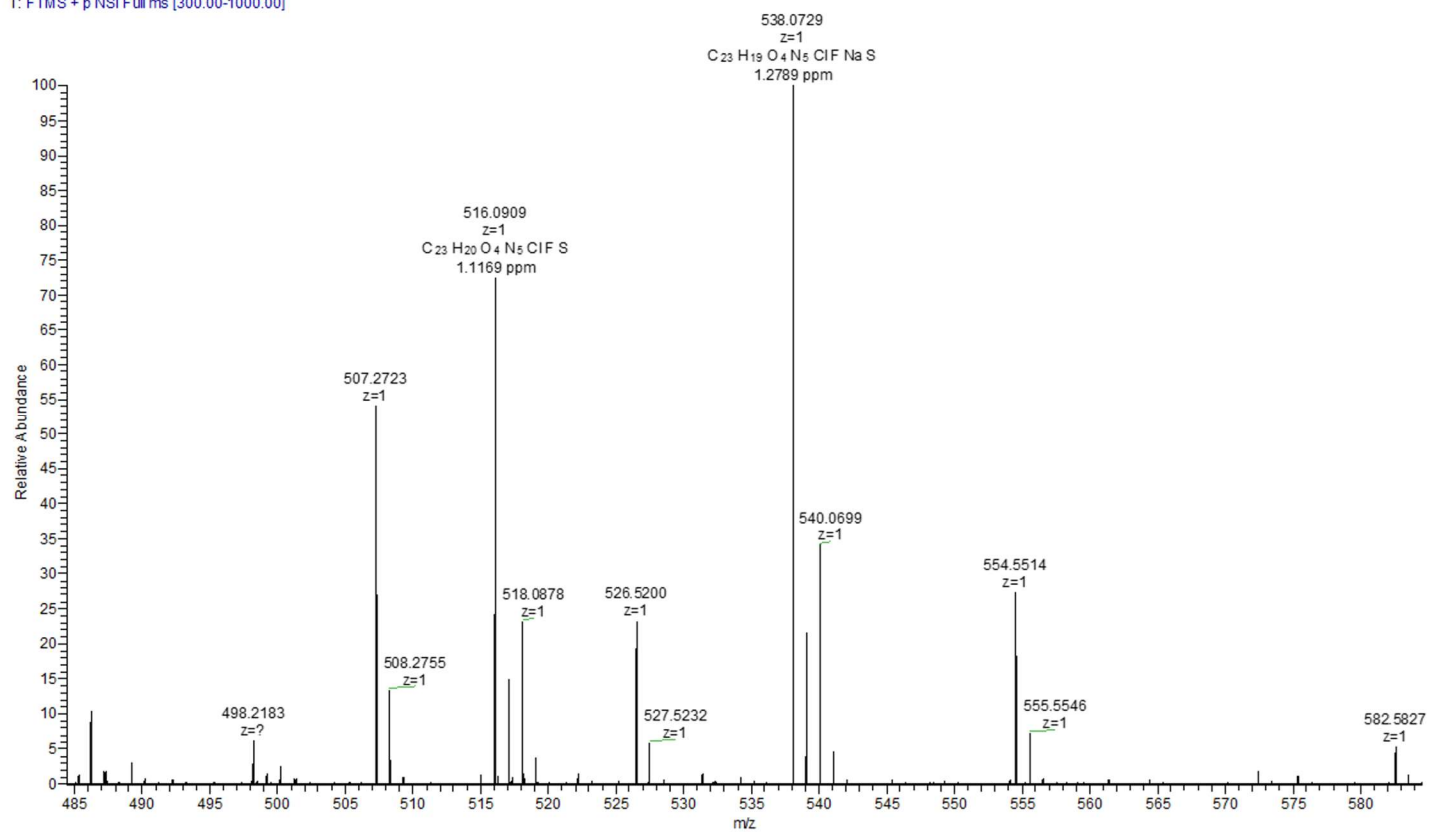

**Figure S67.** HRMS spectrum of compound **7q**.



Supporting information

Ibrahim-SH-7-q-nec #1-17 RT: 0.01-0.45 AV: 17 NL: 1.97E7  
T: FTMS - p NSI Full ms [300.00-1000.00]

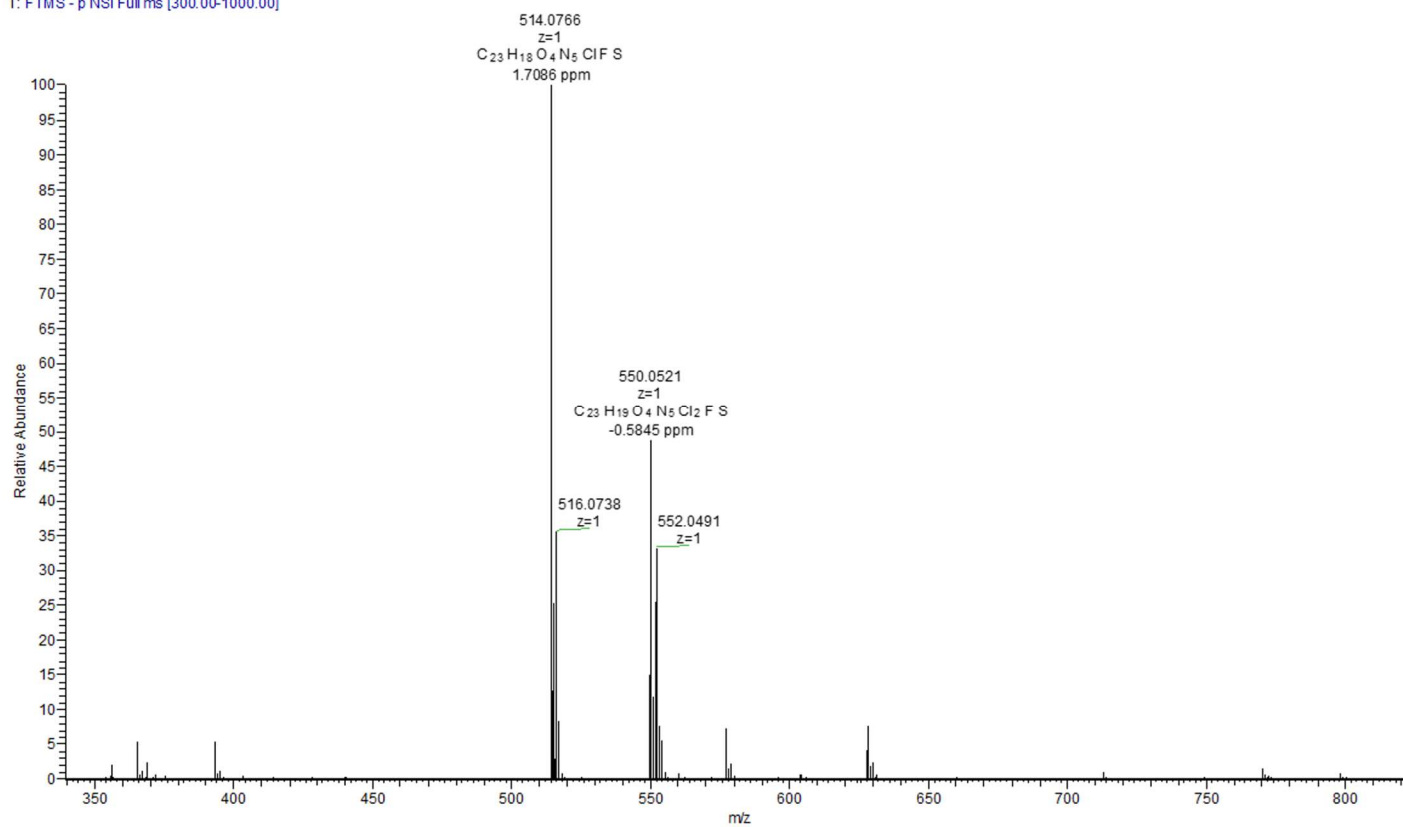

Figure S68. HRMS spectrum of compound 7q.

Supporting information

Ibrahim-SH-7r 230130081229 #1-16 RT: 0.01-0.45 AV: 16 NL: 2.44E7  
T: FTMS + p NSI Full ms [300.00-1000.00]

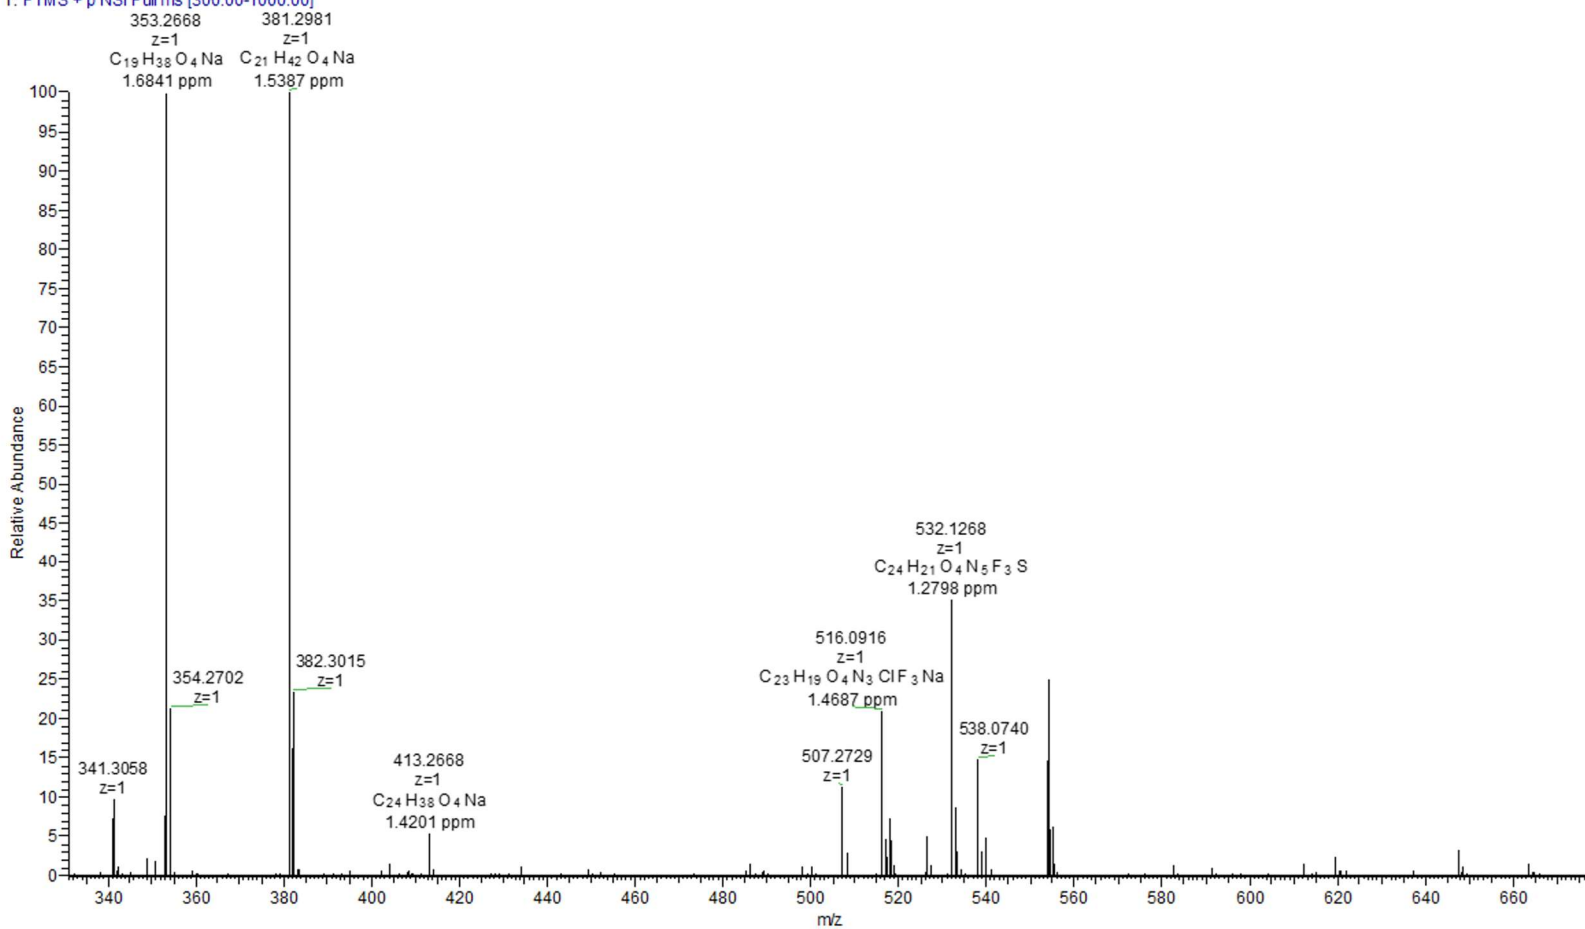

Figure S69. HRMS spectrum of compound 7r.

Supporting information

Ibrahim-SH-7r 230130081229 #1-16 RT: 0.01-0.45 AV: 16 NL: 8.57E6  
T: FTMS + p NSI Full ms [300.00-1000.00]

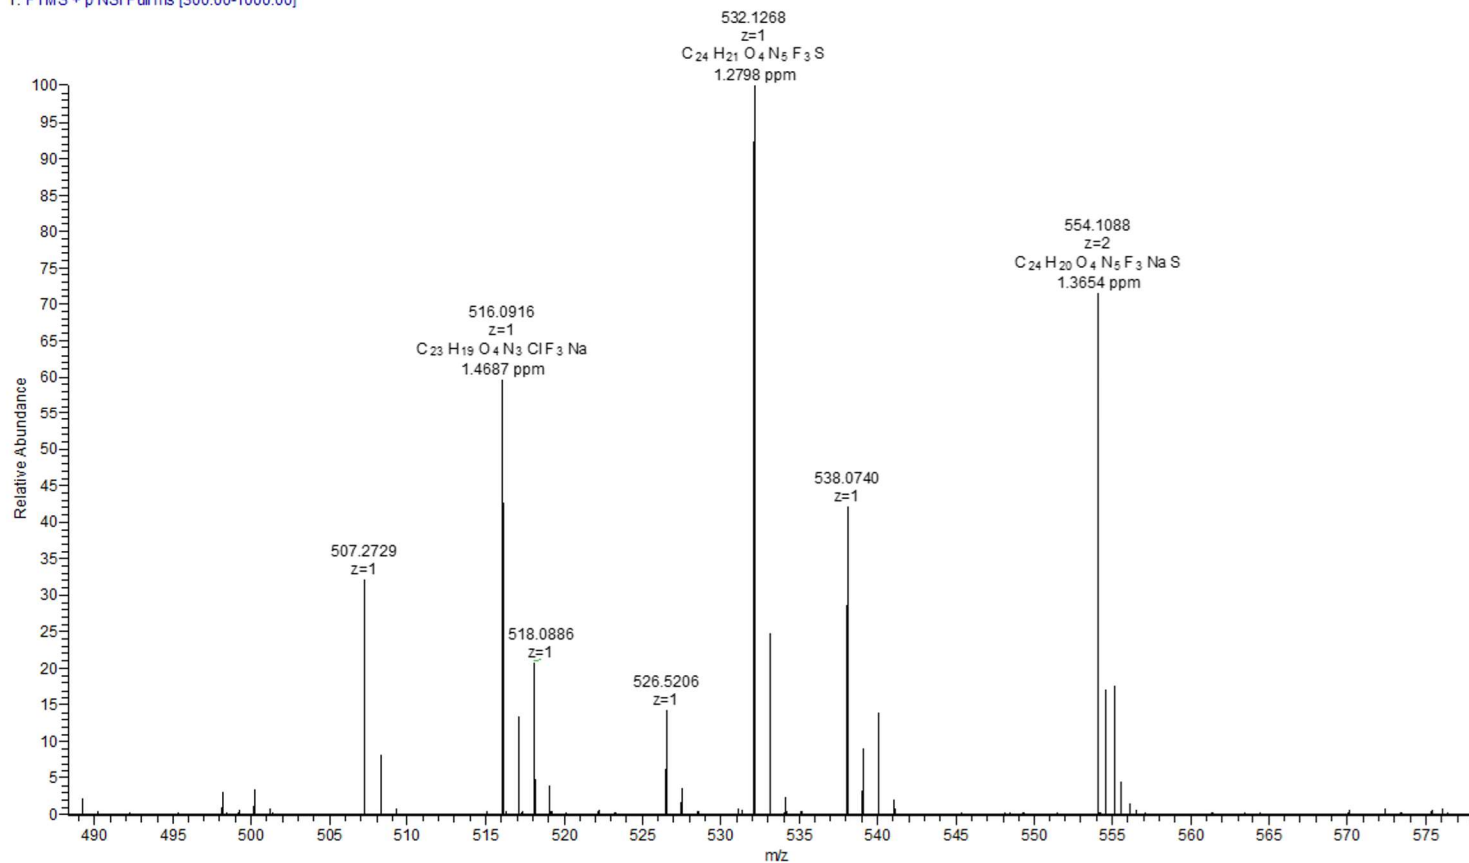

Figure S70. HRMS spectrum of compound 7r

## Supporting information

Ibrahim-SH-7-r-neg #1-17 RT: 0.01-0.45 AV: 17 NL: 9.98E5  
T: FTMS - p NSI Full ms [300.00-1000.00]

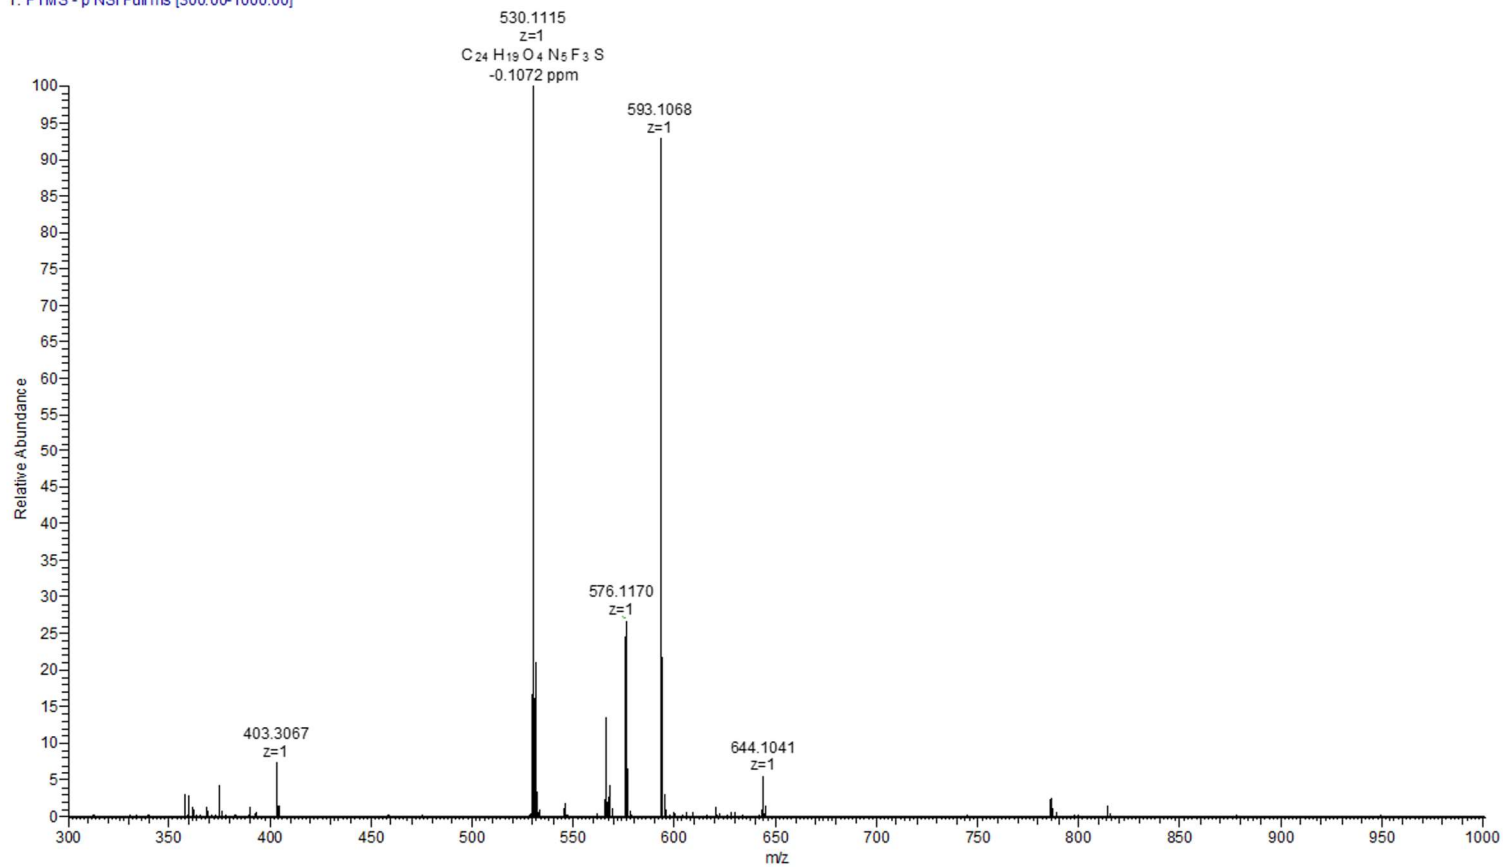

**Figure S71.** HRMS spectrum of compound **7r**.

Supporting information

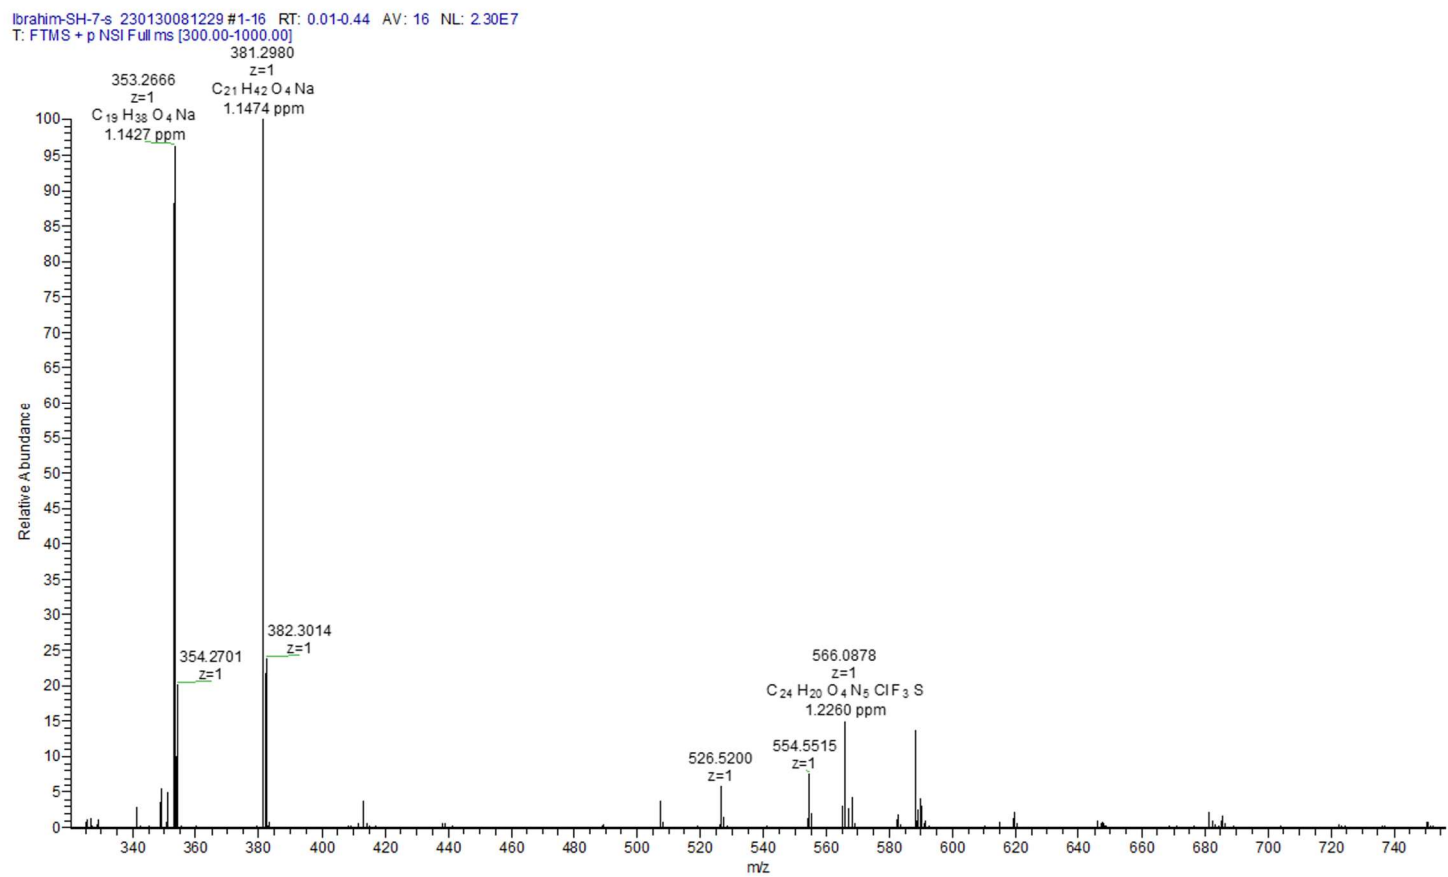

Figure S72. HRMS spectrum of compound 7s.

Supporting information

Ibrahim-SH-7-s 230130081229 #1-17 RT: 0.01-0.47 AV: 17 NL: 3.46E6  
T: FTMS + p NSI Full ms [300.00-1000.00]

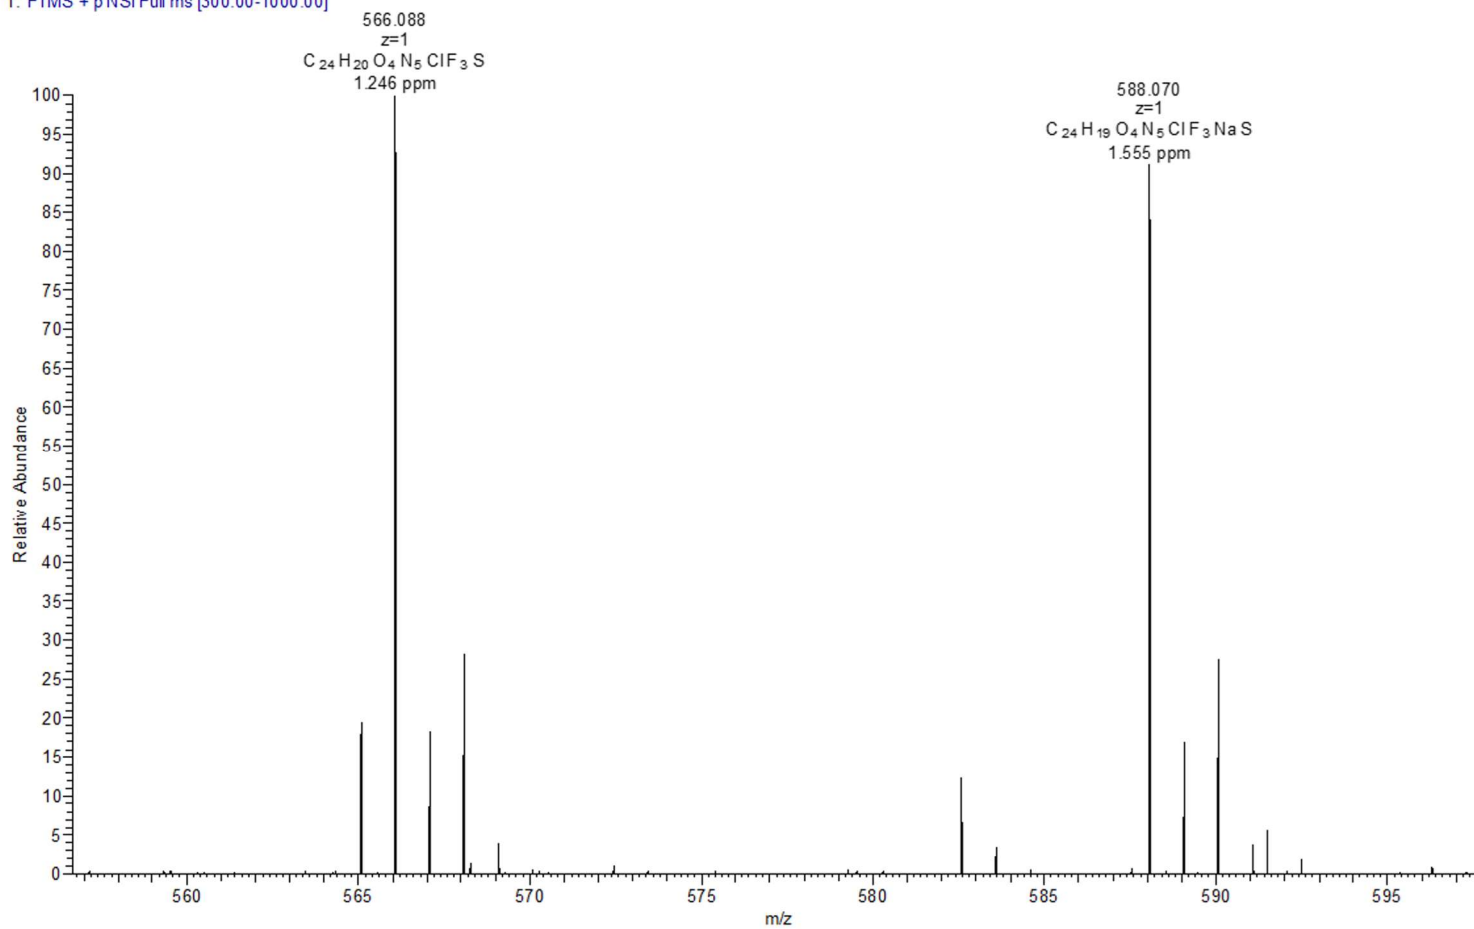

Figure S73. HRMS spectrum of compound 7s.

# Supporting information

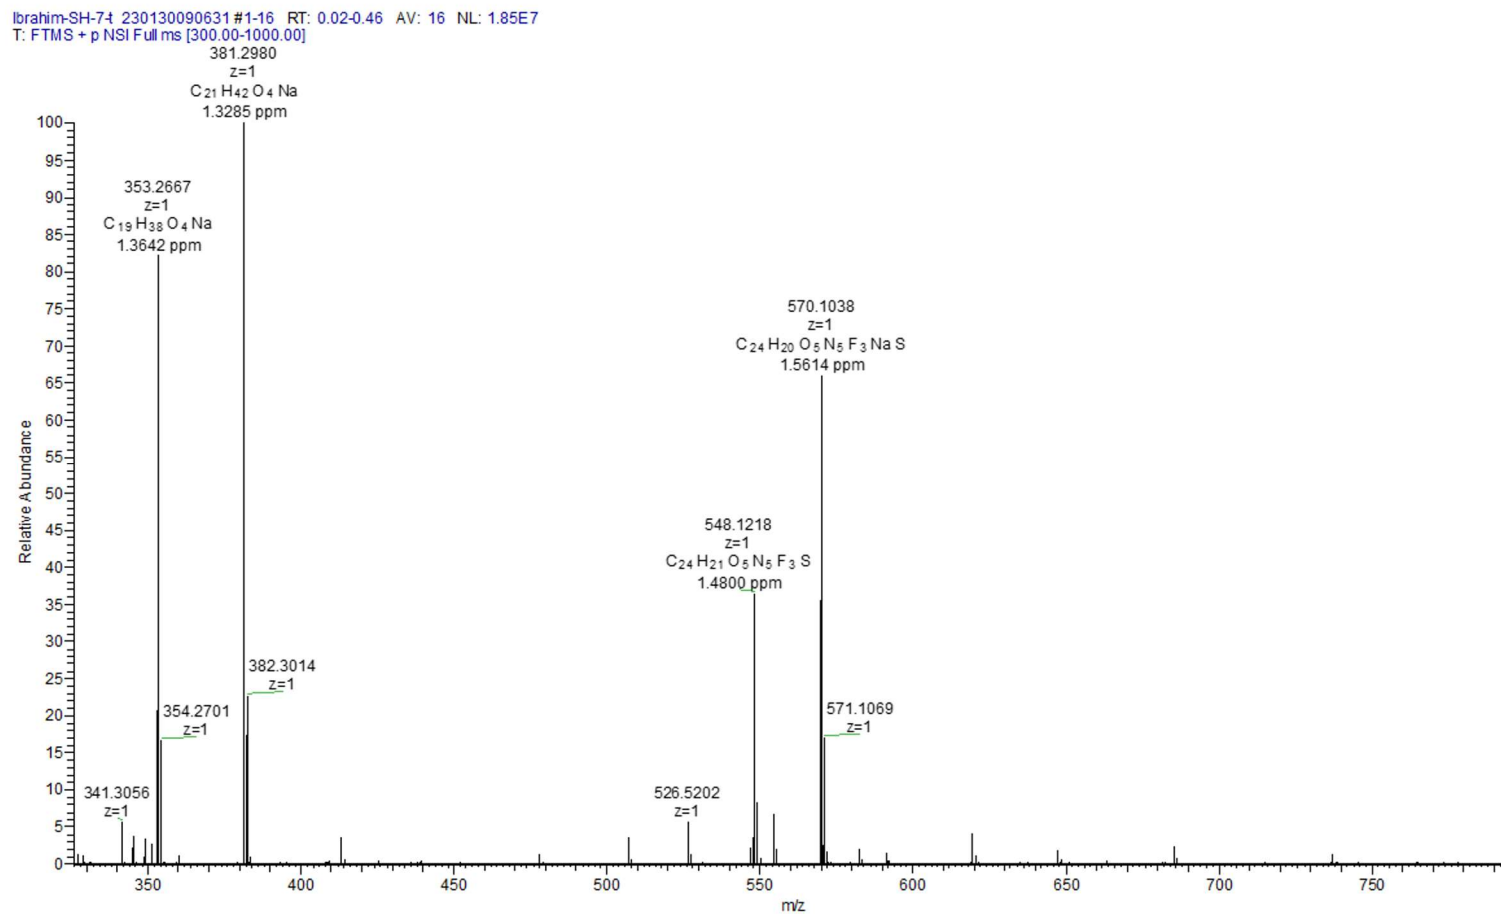

**Figure S74.** HRMS spectrum of compound **7t**.

**HPLC Purity Charts****Analysenreport**

Sample Information

Sample Name :  
 Tray# : 1  
 Vial# : 66  
 Injection Volume : 5  
 Data File : SH-7a-1.lcd  
 Method File : MSP5-95\_30min\_1.0.lcm  
 Batch File : B\_120123.lcb  
 Report Format File : Reportformat2.lsr  
 Date Acquired : 12.01.2023 11:07:26  
 Date Processed : 12.01.2023 11:37:28  
 Comment : MeOH/H2O/TFA 0,05%

mAU

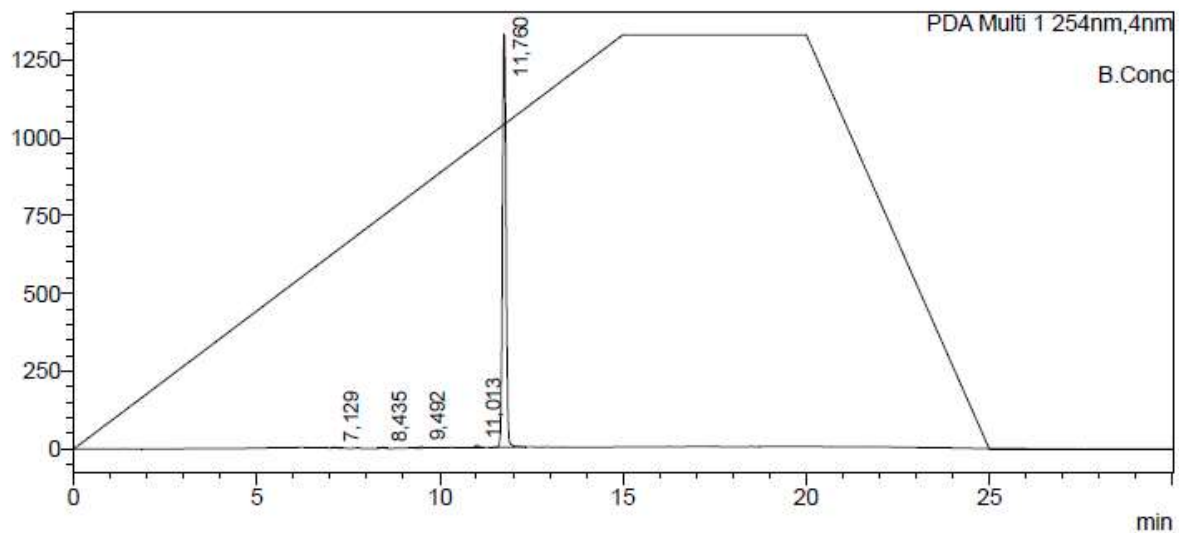

PDA Ch1 254nm

| Peak# | Ret. Time | Area    | Height  | Area%   |
|-------|-----------|---------|---------|---------|
| 1     | 7,129     | 19817   | 3426    | 0,215   |
| 2     | 8,435     | 19304   | 3379    | 0,210   |
| 3     | 9,492     | 21738   | 3857    | 0,236   |
| 4     | 11,013    | 45085   | 7521    | 0,489   |
| 5     | 11,760    | 9106740 | 1324080 | 98,850  |
| Total |           | 9212685 | 1342262 | 100,000 |

**Figure S76.** HPLC chromatogram of compound **7a**



# Analysenreport

Sample Information

Sample Name :  
 Tray# : 1  
 Vial# : 67  
 Injection Volume : 2  
 Data File : SH-7b.lcd  
 Method File : MSP5-95\_30min\_1.0.lcm  
 Batch File : B\_120123.lcb  
 Report Format File : Reportformat2.lsr  
 Date Acquired : 12.01.2023 11:37:56  
 Date Processed : 12.01.2023 12:08:01  
 Comment : MeOH/H2O/TFA 0,05%

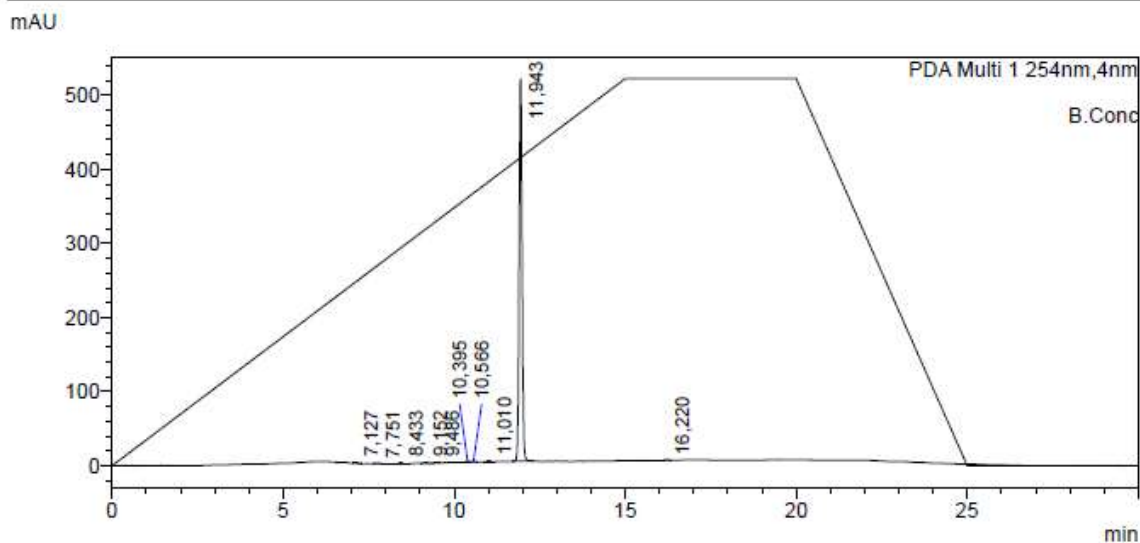

PDA Ch1 254nm

| Peak# | Ret. Time | Area    | Height | Area%   |
|-------|-----------|---------|--------|---------|
| 1     | 7,127     | 8694    | 1549   | 0,279   |
| 2     | 7,751     | 6151    | 926    | 0,197   |
| 3     | 8,433     | 9645    | 1682   | 0,309   |
| 4     | 9,152     | 6847    | 872    | 0,219   |
| 5     | 9,486     | 3820    | 744    | 0,122   |
| 6     | 10,395    | 9015    | 1569   | 0,289   |
| 7     | 10,566    | 5498    | 979    | 0,176   |
| 8     | 11,010    | 11217   | 2009   | 0,360   |
| 9     | 11,943    | 3054506 | 516052 | 97,917  |
| 10    | 16,220    | 4095    | 810    | 0,131   |
| Total |           | 3119489 | 527191 | 100,000 |

Figure S77. HPLC chromatogram of compound 7b

# Analysenreport

## Sample Information

Sample Name :  
 Tray# : 1  
 Vial# : 68  
 Injection Volume : 2  
 Data File : SH-7c.lcd  
 Method File : MSP5-95\_30min\_1.0.lcm  
 Batch File : B\_120123.lcb  
 Report Format File : Reportformat2.lsr  
 Date Acquired : 12.01.2023 12:08:29  
 Date Processed : 12.01.2023 12:38:32  
 Comment : MeOH/H2O/TFA 0,05%

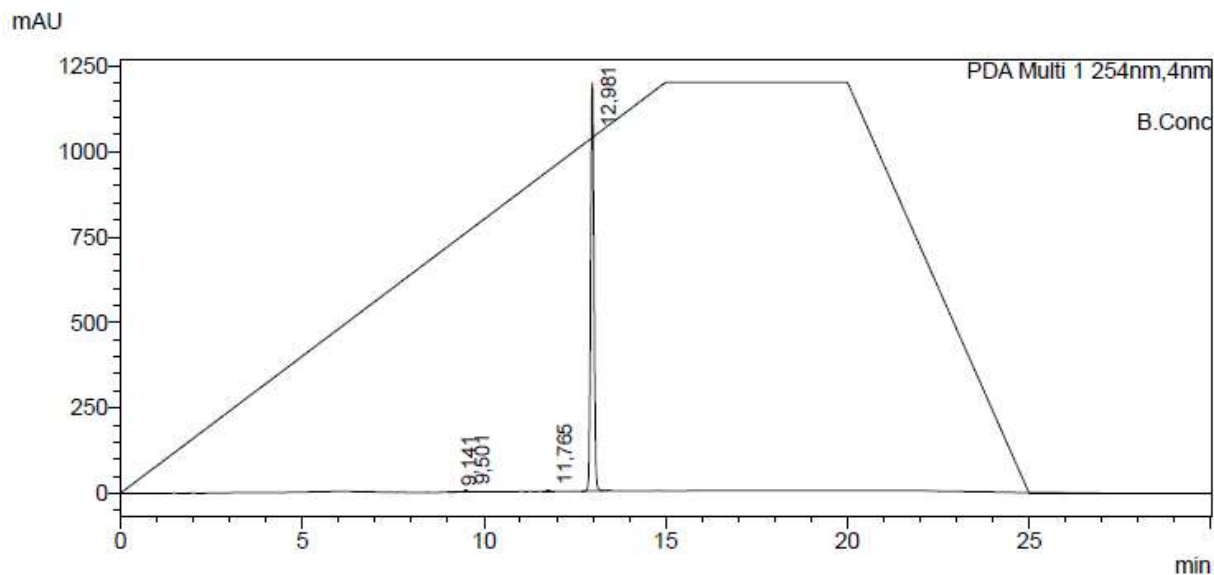

PDA Ch1 254nm

| Peak# | Ret. Time | Area    | Height  | Area%   |
|-------|-----------|---------|---------|---------|
| 1     | 9,141     | 8456    | 979     | 0,110   |
| 2     | 9,501     | 32758   | 5784    | 0,425   |
| 3     | 11,765    | 21915   | 3789    | 0,284   |
| 4     | 12,981    | 7640076 | 1196863 | 99,180  |
| Total |           | 7703206 | 1207415 | 100,000 |

**Figure S78.** HPLC chromatogram of compound **7c**

# Analysenreport

Sample Information

Sample Name :  
 Tray# : 1  
 Vial# : 69  
 Injection Volume : 2  
 Data File : SH-7d-1.lcd  
 Method File : MSP5-95\_30min\_1.0.lcm  
 Batch File : B\_120123.lcb  
 Report Format File : Reportformat2.lsr  
 Date Acquired : 12.01.2023 14:41:05  
 Date Processed : 12.01.2023 15:11:07  
 Comment : MeOH/H<sub>2</sub>O/TFA 0,05%

mAU

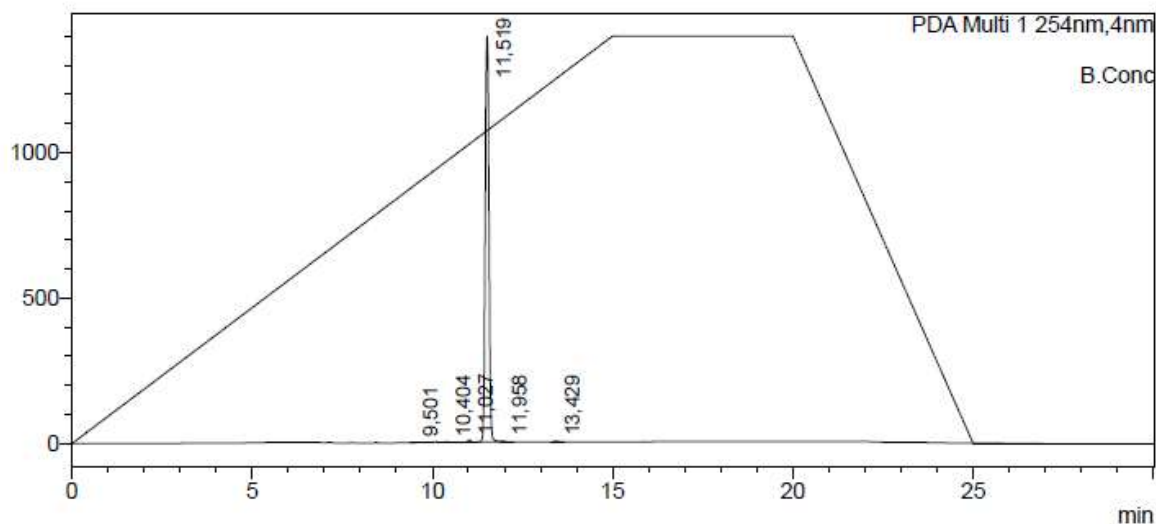

PDA Ch1 254nm

| Peak# | Ret. Time | Area     | Height  | Area%   |
|-------|-----------|----------|---------|---------|
| 1     | 9,501     | 11045    | 2029    | 0,108   |
| 2     | 10,404    | 15556    | 2832    | 0,152   |
| 3     | 11,027    | 39293    | 6980    | 0,384   |
| 4     | 11,519    | 10112541 | 1395591 | 98,915  |
| 5     | 11,958    | 24411    | 3344    | 0,239   |
| 6     | 13,429    | 20642    | 2726    | 0,202   |
| Total |           | 10223487 | 1413503 | 100,000 |

**Figure S79.** HPLC chromatogram of compound **7d**

# Analysenreport

Sample Information

Sample Name :  
 Tray# : 1  
 Vial# : 70  
 Injection Volume : 2  
 Data File : SH-7e.lcd  
 Method File : MSP5-95\_30min\_1.0.lcm  
 Batch File : B\_120123.lcb  
 Report Format File : Reportformat2.lsr  
 Date Acquired : 12.01.2023 13:09:31  
 Date Processed : 12.01.2023 13:39:34  
 Comment : MeOH/H2O/TFA 0,05%

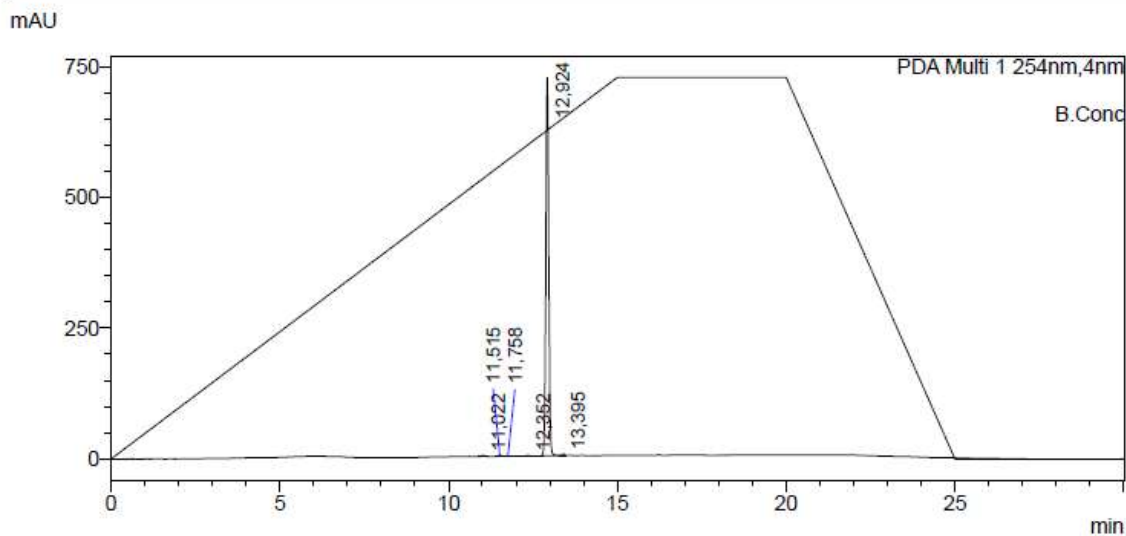

PDA Ch1 254nm

| Peak# | Ret. Time | Area    | Height | Area%   |
|-------|-----------|---------|--------|---------|
| 1     | 11,022    | 9503    | 1674   | 0,217   |
| 2     | 11,515    | 12385   | 1723   | 0,283   |
| 3     | 11,758    | 4366    | 757    | 0,100   |
| 4     | 12,352    | 6082    | 883    | 0,139   |
| 5     | 12,924    | 4320765 | 723011 | 98,872  |
| 6     | 13,395    | 16971   | 3215   | 0,388   |
| Total |           | 4370072 | 731262 | 100,000 |

**Figure S80.** HPLC chromatogram of compound **7e**

# Analysenreport

Sample Information

Sample Name :  
 Tray# : 1  
 Vial# : 71  
 Injection Volume : 2  
 Data File : SH-7f.lcd  
 Method File : MSP5-95\_30min\_1.0.lcm  
 Batch File : B\_120123.lcb  
 Report Format File : Reportformat2.lsr  
 Date Acquired : 12.01.2023 13:40:02  
 Date Processed : 12.01.2023 14:10:04  
 Comment : MeOH/H2O/TFA 0,05%

mAU

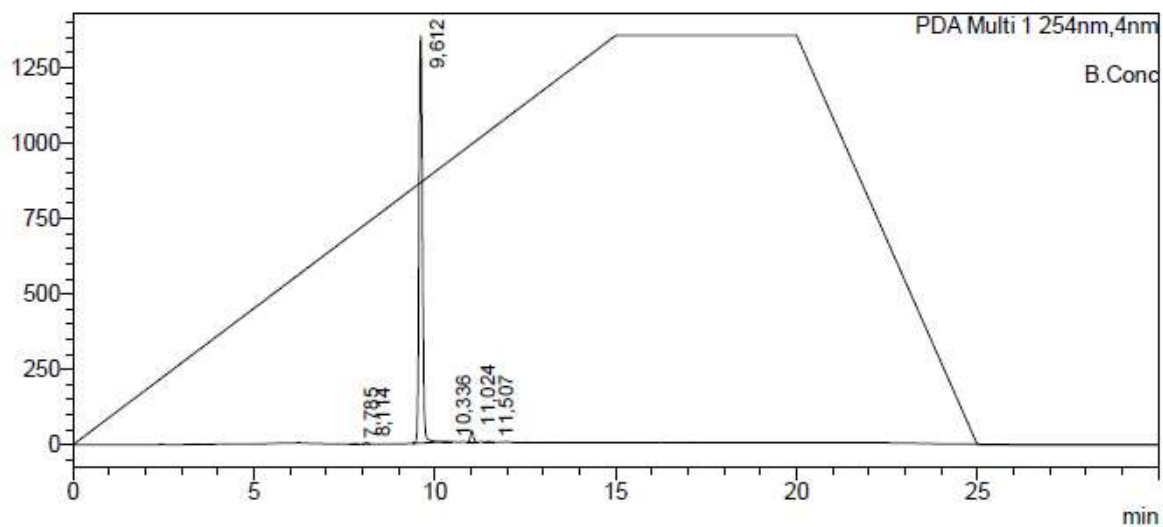

PDA Ch1 254nm

| Peak# | Ret. Time | Area    | Height  | Area%   |
|-------|-----------|---------|---------|---------|
| 1     | 7,785     | 11111   | 1858    | 0,118   |
| 2     | 8,114     | 20234   | 3811    | 0,216   |
| 3     | 9,612     | 9105957 | 1351121 | 97,057  |
| 4     | 10,336    | 13964   | 2002    | 0,149   |
| 5     | 11,024    | 214310  | 37341   | 2,284   |
| 6     | 11,507    | 16538   | 2646    | 0,176   |
| Total |           | 9382114 | 1398778 | 100,000 |

**Figure S81.** HPLC chromatogram of compound **7f**

# Analysenreport

Sample Information

Sample Name :  
 Tray# : 1  
 Vial# : 72  
 Injection Volume : 2  
 Data File : SH-7g.lcd  
 Method File : MSP5-95\_30min\_1.0.lcm  
 Batch File : B\_120123.lcb  
 Report Format File : Reportformat2.lsr  
 Date Acquired : 12.01.2023 14:10:33  
 Date Processed : 12.01.2023 14:40:37  
 Comment : MeOH/H<sub>2</sub>O/TFA 0,05%

mAU

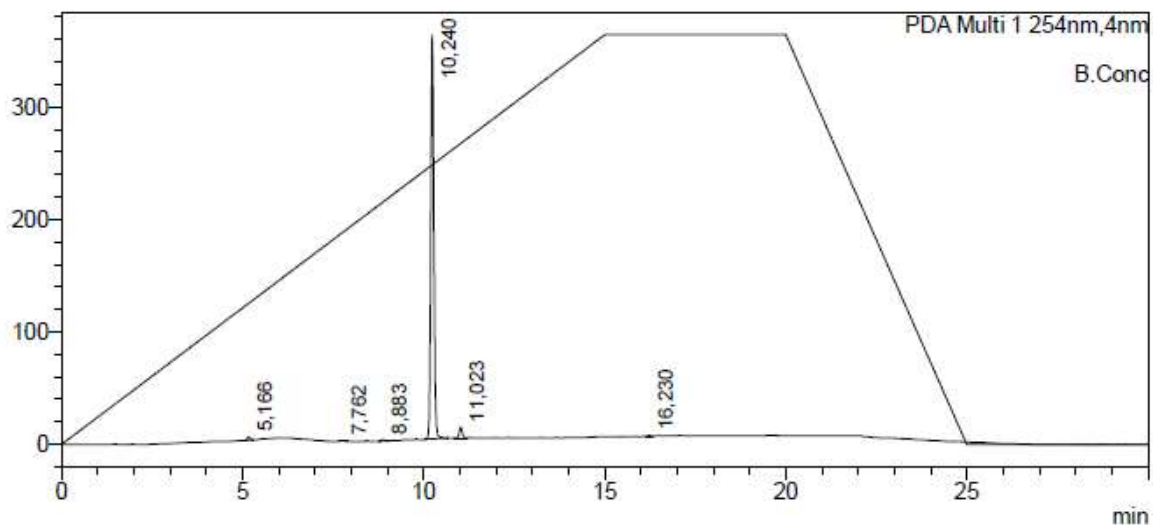

PDA Ch1 254nm

| Peak# | Ret. Time | Area    | Height | Area%   |
|-------|-----------|---------|--------|---------|
| 1     | 5,166     | 16473   | 2649   | 0,747   |
| 2     | 7,762     | 3624    | 666    | 0,164   |
| 3     | 8,883     | 7562    | 1262   | 0,343   |
| 4     | 10,240    | 2117421 | 359213 | 96,029  |
| 5     | 11,023    | 56085   | 9762   | 2,544   |
| 6     | 16,230    | 3812    | 802    | 0,173   |
| Total |           | 2204977 | 374354 | 100,000 |

**Figure S82.** HPLC chromatogram of compound **7g**

# Analysenreport

Sample Information

Sample Name :  
 Tray# : 1  
 Vial# : 73  
 Injection Volume : 2  
 Data File : SH-7h.lcd  
 Method File : MSP5-95\_30min\_1.0.lcm  
 Batch File : B\_120123.lcb  
 Report Format File : Reportformat2.lsr  
 Date Acquired : 12.01.2023 15:11:35  
 Date Processed : 12.01.2023 15:41:38  
 Comment : MeOH/H2O/TFA 0,05%

mAU

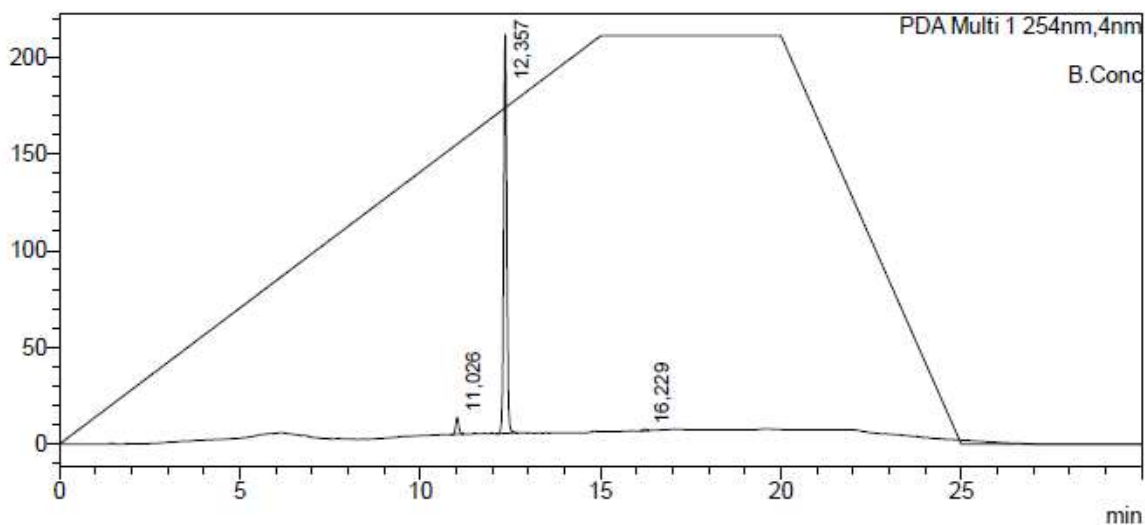

PDA Ch1 254nm

| Peak# | Ret. Time | Area    | Height | Area%   |
|-------|-----------|---------|--------|---------|
| 1     | 11,026    | 51169   | 8737   | 3,975   |
| 2     | 12,357    | 1232148 | 205526 | 95,722  |
| 3     | 16,229    | 3894    | 790    | 0,303   |
| Total |           | 1287211 | 215053 | 100,000 |

**Figure S83.** HPLC chromatogram of compound **7h**

# Analysenreport

Sample Information

Sample Name :  
 Tray# : 1  
 Vial# : 74  
 Injection Volume : 2  
 Data File : SH-7i.lcd  
 Method File : MSP5-95\_30min\_1.0.lcm  
 Batch File : B\_120123.lcb  
 Report Format File : Reportformat2.lsr  
 Date Acquired : 12.01.2023 15:42:07  
 Date Processed : 12.01.2023 16:12:09  
 Comment : MeOH/H2O/TFA 0,05%

mAU

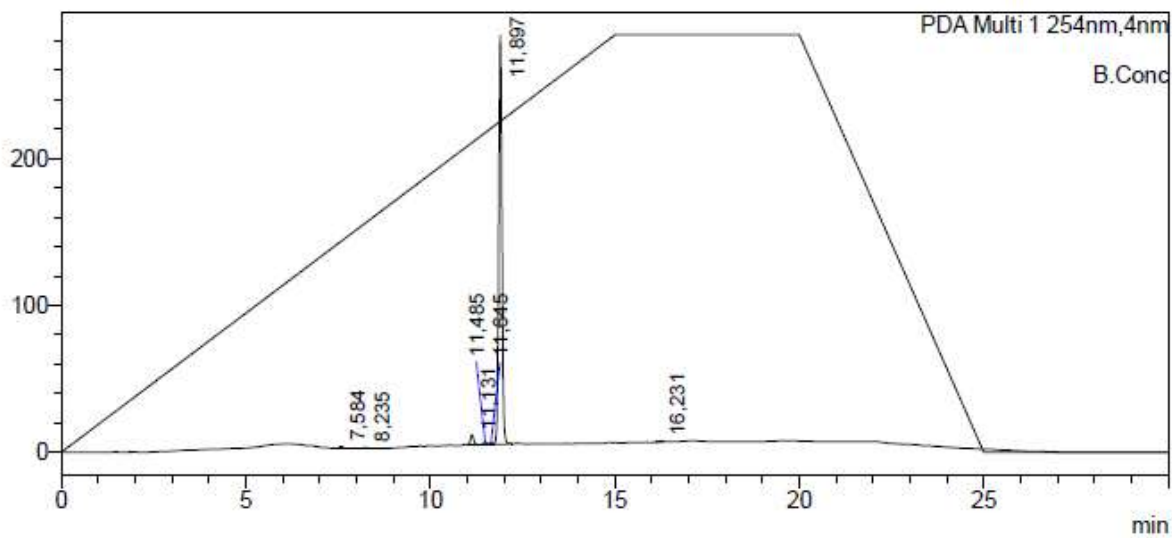

PDA Ch1 254nm

| Peak# | Ret. Time | Area    | Height | Area%   |
|-------|-----------|---------|--------|---------|
| 1     | 7,584     | 7836    | 1358   | 0,445   |
| 2     | 8,235     | 4165    | 747    | 0,236   |
| 3     | 11,131    | 38920   | 6819   | 2,208   |
| 4     | 11,485    | 10530   | 1808   | 0,597   |
| 5     | 11,645    | 6681    | 1115   | 0,379   |
| 6     | 11,897    | 1690843 | 278421 | 95,919  |
| 7     | 16,231    | 3802    | 755    | 0,216   |
| Total |           | 1762778 | 291023 | 100,000 |

**Figure S84.** HPLC chromatogram of compound **7i**



# Analysenreport

Sample Information

Sample Name :  
 Tray# : 1  
 Vial# : 75  
 Injection Volume : 2  
 Data File : SH-7j.lcd  
 Method File : MSP5-95\_30min\_1.0.lcm  
 Batch File : B\_120123.lcb  
 Report Format File : Reportformat2.lsr  
 Date Acquired : 12.01.2023 16:12:39  
 Date Processed : 12.01.2023 16:42:42  
 Comment : MeOH/H2O/TFA 0,05%

mAU

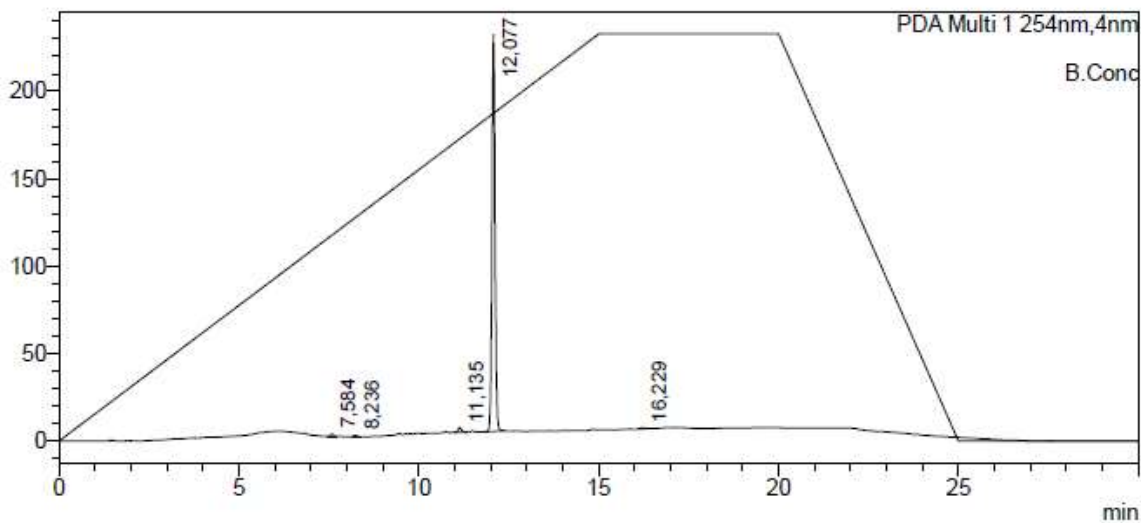

PDA Ch1 254nm

| Peak# | Ret. Time | Area    | Height | Area%   |
|-------|-----------|---------|--------|---------|
| 1     | 7,584     | 8448    | 1400   | 0,608   |
| 2     | 8,236     | 4460    | 803    | 0,321   |
| 3     | 11,135    | 18431   | 2771   | 1,326   |
| 4     | 12,077    | 1355132 | 227307 | 97,488  |
| 5     | 16,229    | 3584    | 739    | 0,258   |
| Total |           | 1390054 | 233019 | 100,000 |

Figure S85. HPLC chromatogram of compound 7j

# Analysenreport

Sample Information

Sample Name :  
 Tray# : 0  
 Vial# : 1  
 Injection Volume : 20  
 Data File : SH-7k-WDH\_1.lcd  
 Method File : MSP5-95\_30min\_1.0.lcm  
 Batch File : B\_130123.lcb  
 Report Format File : Reportformat2.lsr  
 Date Acquired : 13.01.2023 08:45:16  
 Date Processed : 13.01.2023 09:15:19  
 Comment : MeOH/H2O/TFA 0,05%

mAU

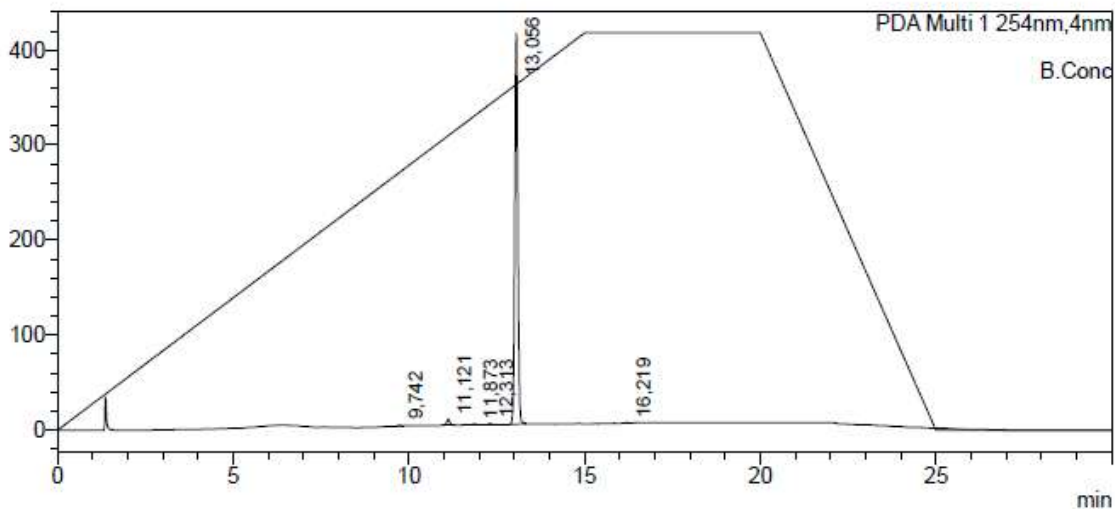

PDA Ch1 254nm

| Peak# | Ret. Time | Area    | Height | Area%   |
|-------|-----------|---------|--------|---------|
| 1     | 9,742     | 5752    | 1047   | 0,226   |
| 2     | 11,121    | 37942   | 6380   | 1,493   |
| 3     | 11,873    | 8020    | 1373   | 0,316   |
| 4     | 12,313    | 8283    | 1294   | 0,326   |
| 5     | 13,056    | 2477436 | 411640 | 97,507  |
| 6     | 16,219    | 3356    | 646    | 0,132   |
| Total |           | 2540789 | 422380 | 100,000 |

**Figure S86.** HPLC chromatogram of compound **7k**

# Analysenreport

Sample Information

Sample Name :  
 Tray# : 1  
 Vial# : 77  
 Injection Volume : 2  
 Data File : SH-71.lcd  
 Method File : MSP5-95\_30min\_1.0.lcm  
 Batch File : B\_120123.lcb  
 Report Format File : Reportformat2.lsr  
 Date Acquired : 12.01.2023 17:13:41  
 Date Processed : 12.01.2023 17:43:44  
 Comment : MeOH/H2O/TFA 0,05%

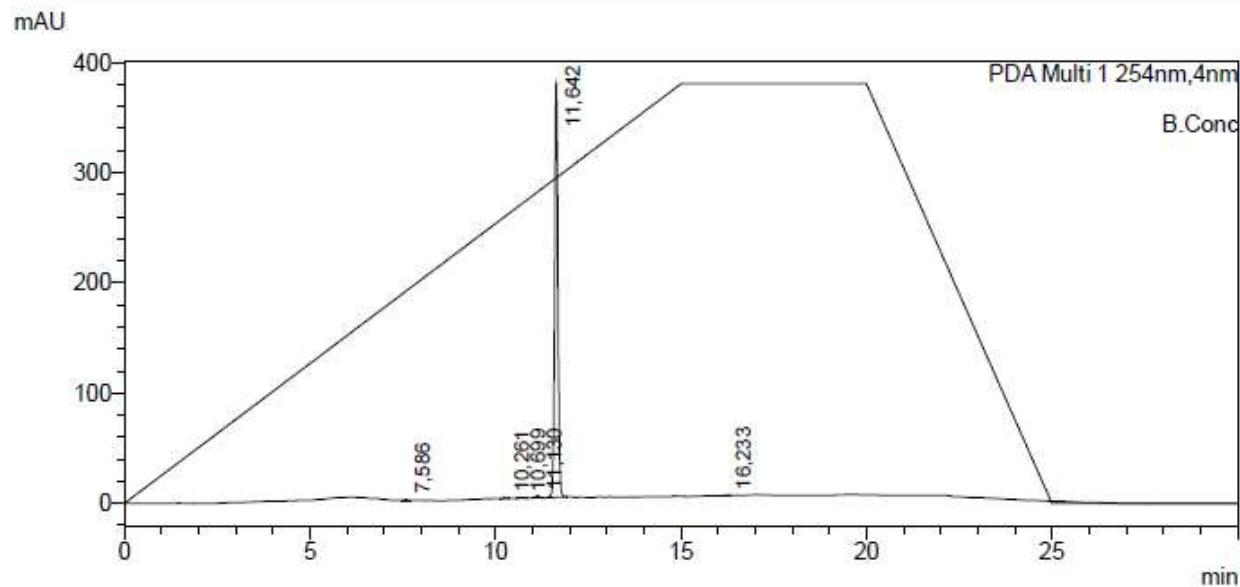

PDA Ch1 254nm

| Peak# | Ret. Time | Area    | Height | Area%   |
|-------|-----------|---------|--------|---------|
| 1     | 7,586     | 5311    | 917    | 0,229   |
| 2     | 10,261    | 4434    | 769    | 0,191   |
| 3     | 10,699    | 6927    | 913    | 0,298   |
| 4     | 11,130    | 12561   | 2118   | 0,541   |
| 5     | 11,642    | 2287718 | 374861 | 98,578  |
| 6     | 16,233    | 3766    | 769    | 0,162   |
| Total |           | 2320718 | 380346 | 100,000 |

**Figure S87.** HPLC chromatogram of compound **7I**

# Analysenreport

Sample Information

Sample Name :  
 Tray# : 1  
 Vial# : 79  
 Injection Volume : 2  
 Data File : SH-7n.lcd  
 Method File : MSP5-95\_30min\_1.0.lcm  
 Batch File : B\_120123.lcb  
 Report Format File : Reportformat2.lsr  
 Date Acquired : 12.01.2023 18:14:43  
 Date Processed : 12.01.2023 18:44:46  
 Comment : MeOH/H2O/TFA 0,05%

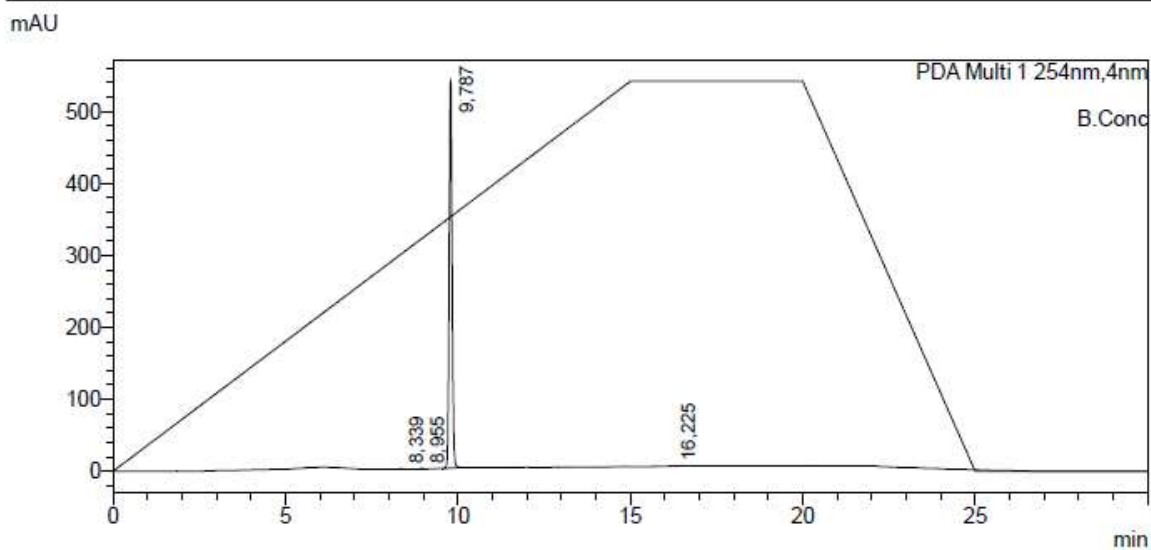

PDA Ch1 254nm

| Peak# | Ret. Time | Area    | Height | Area%   |
|-------|-----------|---------|--------|---------|
| 1     | 8,339     | 7946    | 1283   | 0,251   |
| 2     | 8,955     | 6571    | 1005   | 0,207   |
| 3     | 9,787     | 3149626 | 537701 | 99,420  |
| 4     | 16,225    | 3852    | 777    | 0,122   |
| Total |           | 3167995 | 540765 | 100,000 |

**Figure S88.** HPLC chromatogram of compound **7n**

# Analysenreport

Sample Information

Sample Name :  
 Tray# : 1  
 Vial# : 80  
 Injection Volume : 2  
 Data File : SH-7o.lcd  
 Method File : MSP5-95\_30min\_1.0.lcm  
 Batch File : B\_120123.lcb  
 Report Format File : Reportformat2.lsr  
 Date Acquired : 12.01.2023 18:45:15  
 Date Processed : 12.01.2023 19:15:17  
 Comment : MeOH/H2O/TFA 0,05%

mAU

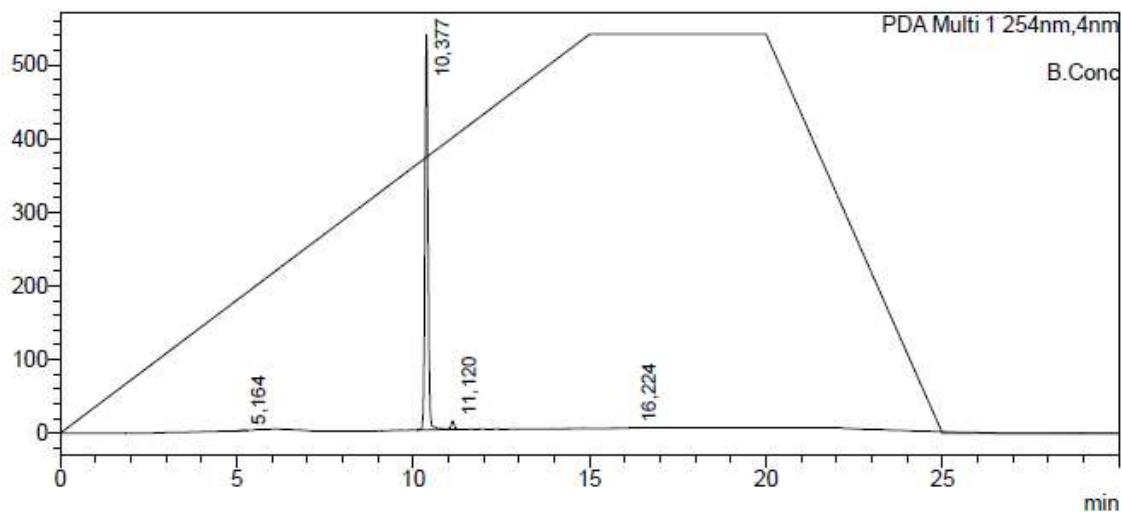

PDA Ch1 254nm

| Peak# | Ret. Time | Area    | Height | Area%   |
|-------|-----------|---------|--------|---------|
| 1     | 5,164     | 5840    | 952    | 0,175   |
| 2     | 10,377    | 3254441 | 537225 | 97,520  |
| 3     | 11,120    | 73227   | 11280  | 2,194   |
| 4     | 16,224    | 3687    | 752    | 0,110   |
| Total |           | 3337195 | 550209 | 100,000 |

**Figure S89.** HPLC chromatogram of compound **7o**.

# Analysenreport

Sample Information

Sample Name :  
 Tray# : 1  
 Vial# : 84  
 Injection Volume : 2  
 Data File : SH-7s.lcd  
 Method File : MSP5-95\_30min\_1.0.lcm  
 Batch File : B\_120123.lcb  
 Report Format File : Reportformat2.lsr  
 Date Acquired : 12.01.2023 20:47:20  
 Date Processed : 12.01.2023 21:17:22  
 Comment : MeOH/H2O/TFA 0,05%

mAU

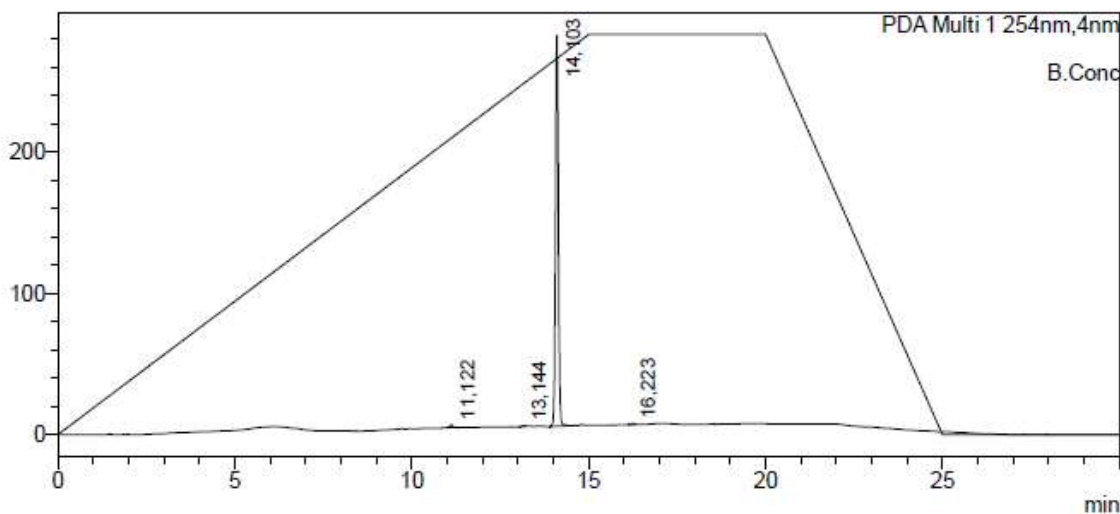

PDA Ch1 254nm

| Peak# | Ret. Time | Area    | Height | Area%   |
|-------|-----------|---------|--------|---------|
| 1     | 11,122    | 12872   | 2172   | 0,814   |
| 2     | 13,144    | 3565    | 709    | 0,226   |
| 3     | 14,103    | 1560708 | 277091 | 98,717  |
| 4     | 16,223    | 3854    | 791    | 0,244   |
| Total |           | 1580999 | 280762 | 100,000 |

**Figure S90.** HPLC chromatogram of compound **7s**.

# Analysenreport

Sample Information

Sample Name :  
 Tray# : 1  
 Vial# : 85  
 Injection Volume : 2  
 Data File : SH-7t.lcd  
 Method File : MSP5-95\_30min\_1.0.lcm  
 Batch File : B\_120123.lcb  
 Report Format File : Reportformat2.lsr  
 Date Acquired : 12.01.2023 21:17:51  
 Date Processed : 12.01.2023 21:47:52  
 Comment : MeOH/H2O/TFA 0,05%

mAU

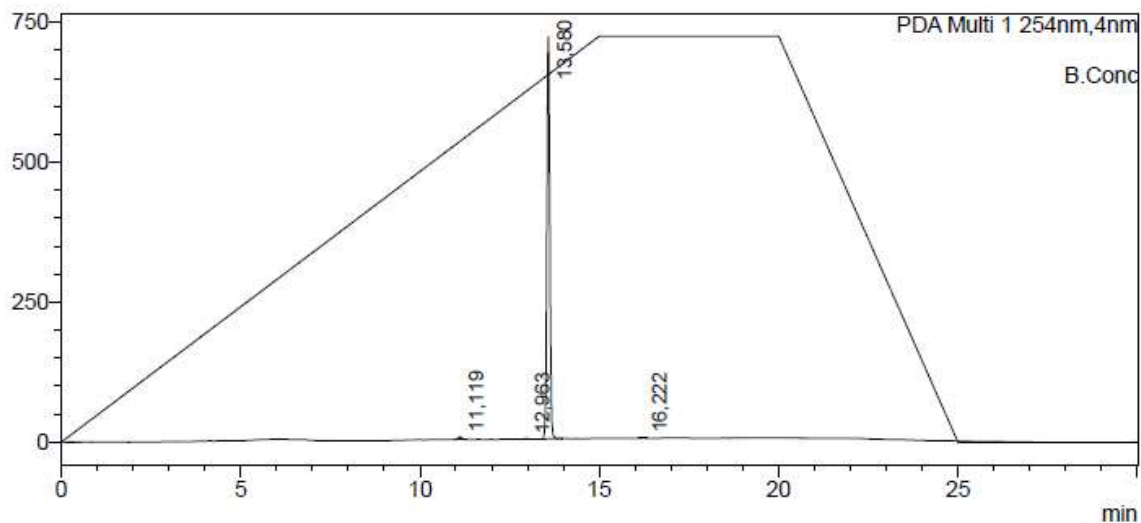

PDA Ch1 254nm

| Peak# | Ret. Time | Area    | Height | Area%   |
|-------|-----------|---------|--------|---------|
| 1     | 11,119    | 29456   | 4960   | 0,702   |
| 2     | 12,963    | 6494    | 1153   | 0,155   |
| 3     | 13,580    | 4158991 | 719503 | 99,053  |
| 4     | 16,222    | 3830    | 769    | 0,091   |
| Total |           | 4198770 | 726385 | 100,000 |

**Figure S91.** HPLC chromatogram of compound **7t**.

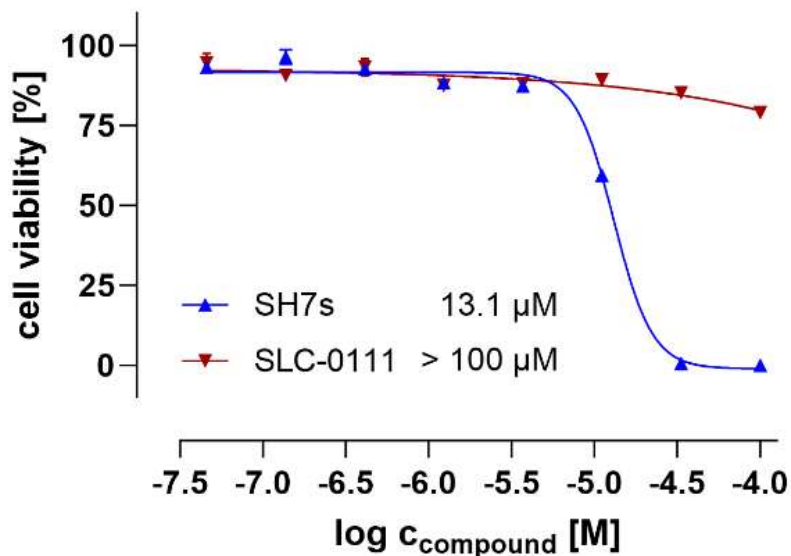

**Figure S92.** Dose-response curves of the anti-proliferative/cytotoxic effects of the derivative SH7s and the CA reference inhibitor SLC-0111 on human HCT-116 colorectal cancer cells, as measured after 48 h treatment by using a fluorometric resazurin-based cell viability assays. The data represent two biological replicates, each comprising technical triplicates. The given values are relative  $IC_{50}$  values. The standard errors are expressed as  $\pm$ SEM. Data analysis was done by using GraphPad Prism 10.1 software.



**Table S1.** Kinase Assay profiling results for compound SH7s.

| Kinases                | % Enzyme Activity (relative to DMSO controls) |        |
|------------------------|-----------------------------------------------|--------|
|                        | SH7s (20 $\mu$ M)                             |        |
|                        | Data 1                                        | Data 2 |
| ABL1 (E255K)           | 103.34                                        | 99.50  |
| ABL1 (E255V)           | 96.59                                         | 96.13  |
| ABL1 (F317I)           | 101.71                                        | 101.68 |
| ABL1 (F317L)           | 105.15                                        | 103.45 |
| ABL1 (G250E)           | 102.03                                        | 101.59 |
| ABL1 (H396P)           | 105.70                                        | 105.57 |
| ABL1 (M351T)           | 105.35                                        | 105.32 |
| ABL1 (Q252H)           | 88.44                                         | 87.29  |
| ABL1 (T315I)           | 99.66                                         | 99.04  |
| ABL1 (V299L)           | 104.67                                        | 102.20 |
| ABL1 (Y253F)           | 105.85                                        | 105.41 |
| ABL1 (Y253H)           | 109.39                                        | 107.47 |
| AKT1 (E17K)            | 110.82                                        | 106.15 |
| AKT2 (E17K)            | 97.43                                         | 94.60  |
| AKT3 (E17K)            | 112.63                                        | 110.30 |
| AKT3 (G171R)           | 101.53                                        | 98.51  |
| ALK (C1156Y)           | 88.52                                         | 86.90  |
| ALK (F1174L)           | 101.78                                        | 98.20  |
| ALK (F1174L)-EML4      | 92.09                                         | 89.33  |
| ALK (F1174L)-NPM1      | 99.66                                         | 95.52  |
| ALK (F1174S)           | 110.50                                        | 109.74 |
| ALK (G1202R)           | 106.81                                        | 106.41 |
| ALK (G1269A)           | 107.86                                        | 107.71 |
| ALK (G1269S)           | 98.79                                         | 98.21  |
| ALK (L1152R)           | 103.21                                        | 101.95 |
| ALK (L1196M)           | 103.69                                        | 101.08 |
| ALK (R1275Q)           | 98.94                                         | 98.41  |
| ALK (S1206R)           | 110.89                                        | 110.61 |
| ALK (T1151-L1152insT)  | 105.99                                        | 104.66 |
| ALK (T1151M)           | 97.18                                         | 96.60  |
| ALK2 (Q207D)           | 33.35                                         | 29.45  |
| ALK2 (R206H)           | 55                                            | 54.91  |
| ALK-KIF5B (Kex24Aex20) | 91.83                                         | 90.86  |
| ALK-KLC1 (Kex8Aex20)   | 106.79                                        | 104.22 |
| ALK-NPM1               | 97.94                                         | 97.84  |
| ALK-TFG                | 100.53                                        | 98.57  |
| ALK-TFG (Tex4Aex20)    | 96.23                                         | 95.80  |
| ALK-TPM1               | 104.91                                        | 102.80 |
| ALK-TPM3               | 104.30                                        | 104.27 |
| Aurora B (G160L)       | 110.71                                        | 104.14 |
| AXL (R499C)            | 109.1                                         | 107.15 |

## Supporting information

|                                  |        |        |
|----------------------------------|--------|--------|
| <b>BRAF (d485-489/P490Y)</b>     | 87.36  | 86.84  |
| <b>BRAF (G464V)</b>              | 90.70  | 87.35  |
| <b>BRAF (G469A)</b>              | 96.73  | 96.42  |
| <b>BRAF (K601E)</b>              | 95.05  | 92.03  |
| <b>BRAF (L597V)</b>              | 108.13 | 105.16 |
| <b>BRAF (R506_K507insVLR)</b>    | 98.49  | 97.88  |
| <b>BRAF (T599_V600insT)</b>      | 104.34 | 102.34 |
| <b>BRAF (V599E)</b>              | 88.51  | 87.62  |
| <b>BRAF (V600A)</b>              | 98.86  | 97.52  |
| <b>BRAF (V600D)</b>              | 89.07  | 87.73  |
| <b>BRAF (V600K)</b>              | 104.17 | 102.51 |
| <b>BRAF-FAM131B (Fex2Bex9)</b>   | 108.76 | 107.89 |
| <b>BRAF-KIAA1549 (Kex15Bex9)</b> | 96.08  | 95.90  |
| <b>BRAF-KIAA1549 (Kex16Bex9)</b> | 88.74  | 87.78  |
| <b>BRAF-SRGAP3 (Sex12Bex9)</b>   | 104.40 | 98.00  |
| <b>BTK (C481S)</b>               | 107.17 | 106.91 |
| <b>BTK (E41K)</b>                | 106.95 | 105.30 |
| <b>BTK (P190K)</b>               | 111.94 | 109.14 |
| <b>CHK2 (I157T)</b>              | 104.42 | 103.28 |
| <b>CK1epsilon (R178C)</b>        | 93.21  | 92.66  |
| <b>c-Kit (A829P)</b>             | 113.02 | 112.63 |
| <b>c-Kit (d557-558)</b>          | 93.73  | 93.26  |
| <b>c-Kit (D816E)</b>             | 96.08  | 95.39  |
| <b>c-Kit (D816F)</b>             | 107.49 | 106.53 |
| <b>c-Kit (D816H)</b>             | 99.46  | 98.43  |
| <b>c-Kit (D816I)</b>             | 98.51  | 96.27  |
| <b>c-Kit (D816V)</b>             | 73.20  | 70.47  |
| <b>c-Kit (D816Y)</b>             | 108.36 | 107.00 |
| <b>c-Kit (D820E)</b>             | 96.04  | 94.69  |
| <b>c-Kit (D820Y)</b>             | 98.07  | 93.10  |
| <b>c-Kit (K642E)</b>             | 89.24  | 86.09  |
| <b>c-Kit (T670I)</b>             | 83.21  | 82.98  |
| <b>c-Kit (V559A)</b>             | 97.74  | 96.13  |
| <b>c-Kit (V559D)</b>             | 104.02 | 103.46 |
| <b>c-Kit (V559D/T670I)</b>       | 100.49 | 100.14 |
| <b>c-Kit (V559D/V654A)</b>       | 95.19  | 93.96  |
| <b>c-Kit (V560G)</b>             | 91.89  | 91.57  |
| <b>c-Kit (V560G/D816V)</b>       | 110.05 | 107.99 |
| <b>c-Kit (V560G/N822K)</b>       | 107.51 | 106.26 |
| <b>c-Kit (V654A)</b>             | 97.00  | 84.95  |
| <b>c-Kit (Y823D)</b>             | 98.22  | 97.82  |
| <b>c-MER (A708S)</b>             | 82.73  | 82.70  |
| <b>c-MET (D1228H)</b>            | 112.62 | 106.79 |
| <b>c-MET (D1228N)</b>            | 110.82 | 107.33 |
| <b>c-MET (F1200I)</b>            | 107.15 | 105.35 |
| <b>c-MET (K1244R)</b>            | 109.69 | 109.22 |
| <b>c-MET (M1250I)</b>            | 117.20 | 112.66 |

## Supporting information

|                                          |        |        |
|------------------------------------------|--------|--------|
| <b>c-MET (M1250T)</b>                    | 102.03 | 99.96  |
| <b>c-MET (P991S)</b>                     | 129.53 | 128.41 |
| <b>c-MET (T1173I)</b>                    | 110.18 | 109.13 |
| <b>c-MET (T992I)</b>                     | 103.76 | 103.69 |
| <b>c-MET (V1092I)</b>                    | 110.24 | 109.10 |
| <b>c-MET (Y1230A)</b>                    | 107.15 | 105.34 |
| <b>c-MET (Y1230C)</b>                    | 114.24 | 113.96 |
| <b>c-MET (Y1230D)</b>                    | 96.45  | 95.97  |
| <b>c-MET (Y1230H)</b>                    | 116.25 | 115.88 |
| <b>c-MET (Y1230S)</b>                    | 101.42 | 100.26 |
| <b>c-MET (Y1235D)</b>                    | 92.99  | 85.03  |
| <b>c-MET-KIF5B (Kex24Mex14)</b>          | 100.54 | 98.79  |
| <b>c-MET-TFG (Tex5Mex15)</b>             | 92.07  | 90.58  |
| <b>c-Src (T341M)</b>                     | 109.68 | 104.17 |
| <b>DDR2 (N456S)</b>                      | 95.54  | 95.03  |
| <b>DDR2 (T654M)</b>                      | 100.08 | 97.02  |
| <b>EGFR (A763_Y764insFHEA)</b>           | 108.98 | 108.71 |
| <b>EGFR (A763_Y764insFQEA)</b>           | 103.56 | 102.02 |
| <b>EGFR (C775S/T790M/L858R)</b>          | 142.60 | 140.61 |
| <b>EGFR (C797A)</b>                      | 94.19  | 91.03  |
| <b>EGFR (C797S)</b>                      | 101.61 | 101.56 |
| <b>EGFR (C797S/L858R)</b>                | 101.40 | 100.42 |
| <b>EGFR (d746)</b>                       | 95.02  | 93.01  |
| <b>EGFR (d746-750)</b>                   | 96.82  | 93.55  |
| <b>EGFR (d746-750/C775S/T790M/L858R)</b> | 99.62  | 98.28  |
| <b>EGFR (d746-750/C797A)</b>             | 105.74 | 104.88 |
| <b>EGFR (d746-750/C797S)</b>             | 101.81 | 99.43  |
| <b>EGFR (d746-750/T790M)</b>             | 95.74  | 95.53  |
| <b>EGFR (d746-750/T790M/C797S)</b>       | 104.12 | 102.30 |
| <b>EGFR (d747-749)</b>                   | 100.48 | 99.65  |
| <b>EGFR (d747-749/A750P)</b>             | 104.28 | 101.42 |
| <b>EGFR (d747-752/P753S)</b>             | 108.50 | 108.14 |
| <b>EGFR (d752-759)</b>                   | 85.43  | 74.93  |
| <b>EGFR (D761Y)</b>                      | 100.77 | 99.65  |
| <b>EGFR (D770_N771insNPG)</b>            | 99.62  | 98.35  |
| <b>EGFR (D770_N771insNPG/T790M)</b>      | 99.89  | 99.62  |
| <b>EGFR (D770GY)</b>                     | 100.07 | 99.46  |
| <b>EGFR (G719C)</b>                      | 106.29 | 105.03 |
| <b>EGFR (G719D)</b>                      | 105.90 | 105.67 |
| <b>EGFR (G719S)</b>                      | 98.33  | 95.15  |
| <b>EGFR (K716A)</b>                      | 106.99 | 104.67 |
| <b>EGFR (K716A/C797S/L858R)</b>          | 109.62 | 108.47 |
| <b>EGFR (K716Q/L718Q)</b>                | 104.68 | 103.86 |
| <b>EGFR (K728A)</b>                      | 97.43  | 96.14  |
| <b>EGFR (L718Q)</b>                      | 93.29  | 91.36  |
| <b>EGFR (L747S)</b>                      | 104.46 | 102.65 |

## Supporting information

|                                       |        |        |
|---------------------------------------|--------|--------|
| <b>EGFR (L792F)</b>                   | 107.60 | 107.47 |
| <b>EGFR (L792F/L858R)</b>             | 92.47  | 92.18  |
| <b>EGFR (L792H/C797S/L858R)</b>       | 99.41  | 96.84  |
| <b>EGFR (L858R)</b>                   | 90.73  | 88.97  |
| <b>EGFR (L858R, T790M)</b>            | 101.05 | 98.56  |
| <b>EGFR (L861Q)</b>                   | 106.89 | 100.01 |
| <b>EGFR (T790M)</b>                   | 100.74 | 99.07  |
| <b>EGFR (T790M/C797S)</b>             | 102.01 | 97.76  |
| <b>EGFR (T790M/C797S/L858R)</b>       | 100.39 | 100.22 |
| <b>EGFR (T790M/L792F/C797S/L858R)</b> | 100.82 | 99.54  |
| <b>EGFR (T790M/L792F/L858R)</b>       | 102.40 | 101.66 |
| <b>EGFR (T790M/L792H/C797S/L858R)</b> | 119.48 | 115.17 |
| <b>EGFR (T790M/L792H/L858R)</b>       | 107.68 | 105.07 |
| <b>ERBB2 (D769H)</b>                  | 104.97 | 103.68 |
| <b>ERBB2 (D769Y)</b>                  | 102.59 | 100.17 |
| <b>ERBB2 (P1170A)</b>                 | 99.11  | 94.9   |
| <b>ERBB2 (P780_Y781insGSP)</b>        | 102.67 | 101.67 |
| <b>ERBB2 (R896C)</b>                  | 103.28 | 103.06 |
| <b>ERBB2 (V777_G778insCG)</b>         | 103.69 | 102.35 |
| <b>ERBB2 (V777L)</b>                  | 107.71 | 106.76 |
| <b>FGFR1 (V561M)</b>                  | 95.81  | 93.40  |
| <b>FGFR1OP-FGFR1</b>                  | 98.23  | 97.11  |
| <b>FGFR2 (C491A)</b>                  | 95.17  | 93.41  |
| <b>FGFR2 (C491F)</b>                  | 93.41  | 92.99  |
| <b>FGFR2 (C491S)</b>                  | 109.50 | 108.23 |
| <b>FGFR2 (E565G)</b>                  | 107.52 | 105.13 |
| <b>FGFR2 (K526E)</b>                  | 95.36  | 94.51  |
| <b>FGFR2 (K641R)</b>                  | 105.94 | 102.91 |
| <b>FGFR2 (K659N)</b>                  | 102.79 | 102.25 |
| <b>FGFR2 (N549H)</b>                  | 108.63 | 108.02 |
| <b>FGFR2 (R612T)</b>                  | 96.18  | 94.76  |
| <b>FGFR2 (V564F)</b>                  | 102.85 | 102.27 |
| <b>FGFR3 (G697C)</b>                  | 102.97 | 96.38  |
| <b>FGFR3 (K650E)</b>                  | 105.98 | 103.84 |
| <b>FGFR3 (K650M)</b>                  | 103.98 | 101.79 |
| <b>FGFR3 (K650Q)</b>                  | 92.33  | 90.69  |
| <b>FGFR3 (V555M)</b>                  | 107.98 | 105.77 |
| <b>FGFR4 (N535K)</b>                  | 103.23 | 98.99  |
| <b>FGFR4 (V550E)</b>                  | 101.62 | 99.79  |
| <b>FGFR4 (V550L)</b>                  | 117.62 | 117.20 |
| <b>FGFR4 (V550M)</b>                  | 96.00  | 93.38  |
| <b>FLT3 (D835Y)</b>                   | 92.76  | 92.42  |
| <b>FLT3 (F594_R595insR)</b>           | 89.45  | 86.53  |
| <b>FLT3 (F594_R595insREY)</b>         | 96.00  | 92.70  |
| <b>FLT3 (ITD)</b>                     | 82.84  | 81.57  |
| <b>FLT3 (ITD)-NPOS</b>                | 99.13  | 97.61  |
| <b>FLT3 (ITD)-W51</b>                 | 86.12  | 84.81  |

## Supporting information

|                                     |        |        |
|-------------------------------------|--------|--------|
| <b>FLT3 (R595_E596insEY)</b>        | 90.33  | 89.98  |
| <b>FLT3 (Y591-V592insVDFREYEYD)</b> | 107.53 | 105.89 |
| <b>FYN (Y531F)</b>                  | 100.18 | 98.84  |
| <b>JAK2 (V617F)</b>                 | 107.01 | 106.82 |
| <b>KSR1 (A635F)</b>                 | 108.04 | 105.41 |
| <b>KSR1 (L639F)</b>                 | 97.15  | 94.41  |
| <b>KSR2 (R676S)</b>                 | 93.31  | 90.78  |
| <b>LRRK2 (G2019S)</b>               | 94.26  | 92.91  |
| <b>LRRK2 (I2020T)</b>               | 112.16 | 110.60 |
| <b>LRRK2 (R1441C)</b>               | 93.71  | 91.90  |
| <b>MEK1 (P124L)</b>                 | 95.01  | 94.01  |
| <b>MELK (T460M)</b>                 | 94.54  | 94.33  |
| <b>P38a (T106M)</b>                 | 104.08 | 102.27 |
| <b>PDGFRa (D842V)</b>               | 103.38 | 102.24 |
| <b>PDGFRa (T674I)</b>               | 116.00 | 110.27 |
| <b>PDGFRa (V561D)</b>               | 103.33 | 102.70 |
| <b>PDGFRa-FIP1L1</b>                | 89.65  | 89.52  |
| <b>PDGFRb-TPM3</b>                  | 98.26  | 97.97  |
| <b>PKD2 (G870E)</b>                 | 106.30 | 105.12 |
| <b>PKMzeta</b>                      | 95.20  | 92.91  |
| <b>PKN1-TECR (Tex1Pex10)</b>        | 105.39 | 105.39 |
| <b>RET (A883F)</b>                  | 105.17 | 104.71 |
| <b>RET (E762Q)</b>                  | 100.70 | 98.80  |
| <b>RET (G691S)</b>                  | 95.85  | 95.27  |
| <b>RET (L790F)</b>                  | 107.89 | 102.98 |
| <b>RET (M918T)</b>                  | 105.81 | 104.22 |
| <b>RET (R749T)</b>                  | 107.01 | 105.36 |
| <b>RET (R813Q)</b>                  | 101.46 | 101.22 |
| <b>RET (R912P)</b>                  | 99.06  | 98.29  |
| <b>RET (S891A)</b>                  | 107.95 | 103.94 |
| <b>RET (S904A)</b>                  | 106.75 | 105.15 |
| <b>RET (S904F)</b>                  | 99.76  | 98.74  |
| <b>RET (V778I)</b>                  | 101.75 | 100.56 |
| <b>RET (V804E)</b>                  | 107.07 | 106.17 |
| <b>RET (V804L)</b>                  | 104.76 | 102.96 |
| <b>RET (V804L)-KIF5B</b>            | 106.39 | 104.83 |
| <b>RET (V804M)</b>                  | 107.57 | 106.78 |
| <b>RET (V804M)-KIF5B</b>            | 99.83  | 97.12  |
| <b>RET (Y791F)</b>                  | 112.48 | 112.43 |
| <b>RET (Y806H)</b>                  | 120.25 | 118.47 |
| <b>RET-BCR</b>                      | 114.49 | 113.51 |
| <b>RET-CCDC6 (PTC1)</b>             | 105.16 | 104.93 |
| <b>RET-KIF5B (Kex15Rex14)</b>       | 97.65  | 95.25  |
| <b>RET-NCOA4 (PTC3)</b>             | 102.16 | 102.09 |
| <b>RET-PRKAR1A (PTC2)</b>           | 104.28 | 104.25 |
| <b>ROS1 (G2032R)</b>                | 104.93 | 100.37 |
| <b>ROS1-GOPC</b>                    | 106.67 | 106.20 |

## Supporting information

|                           |        |        |
|---------------------------|--------|--------|
| <b>ROS1-TPM3</b>          | 100.51 | 100.21 |
| <b>RSK2 (I416V)</b>       | 100.70 | 99.50  |
| <b>RSK2 (L608F)</b>       | 108.98 | 104.33 |
| <b>TIE2 (A1124V)</b>      | 82.22  | 78.48  |
| <b>TIE2 (P883A)</b>       | 83.15  | 82.89  |
| <b>TIE2 (R849W)</b>       | 102.46 | 100.85 |
| <b>TIE2 (Y1108F)</b>      | 96.83  | 94.28  |
| <b>TIE2 (Y897C)</b>       | 87.71  | 87.05  |
| <b>TIE2 (Y897S)</b>       | 95.86  | 86.79  |
| <b>TRKA (A608D)</b>       | 67.50  | 67.43  |
| <b>TRKA (F589L)</b>       | 89.98  | 86.75  |
| <b>TRKA (G595R)</b>       | 96.28  | 95.50  |
| <b>TRKA (G595R/A608D)</b> | 55.83  | 55.67  |
| <b>TRKA (G595R/G667A)</b> | 99.02  | 93.75  |
| <b>TRKA (G595R/G667C)</b> | 94.64  | 89.52  |
| <b>TRKA (G595R/G667S)</b> | 106.34 | 99.84  |
| <b>TRKA (G595R/L657M)</b> | 86.43  | 82.13  |
| <b>TRKA (G667C)</b>       | 64.97  | 64.31  |
| <b>TRKA (G667S)</b>       | 92.60  | 90.59  |
| <b>TRKA (L657M)</b>       | 90.35  | 88.09  |
| <b>TRKA-TFG (TRK-T3)</b>  | 121.72 | 113.42 |
| <b>TRKA-TPM3</b>          | 72.59  | 71.21  |
| <b>TRKA-TPR</b>           | 91.4   | 90.43  |
| <b>TRKC (G623E)</b>       | 92.13  | 91.63  |
| <b>TRKC (G623R)</b>       | 71.93  | 70.77  |
| <b>TRKC (G623R/L686M)</b> | 97.08  | 96.74  |
| <b>TRKC (G696A)</b>       | 75.32  | 72.70  |
| <b>TRKC (L686M)</b>       | 69.31  | 68.86  |
| <b>YES1 (T348I)</b>       | 117.43 | 108.02 |
| <b>ZAP70 (Y319F)</b>      | 99.26  | 98.22  |

**NCI charts for cellular assay**

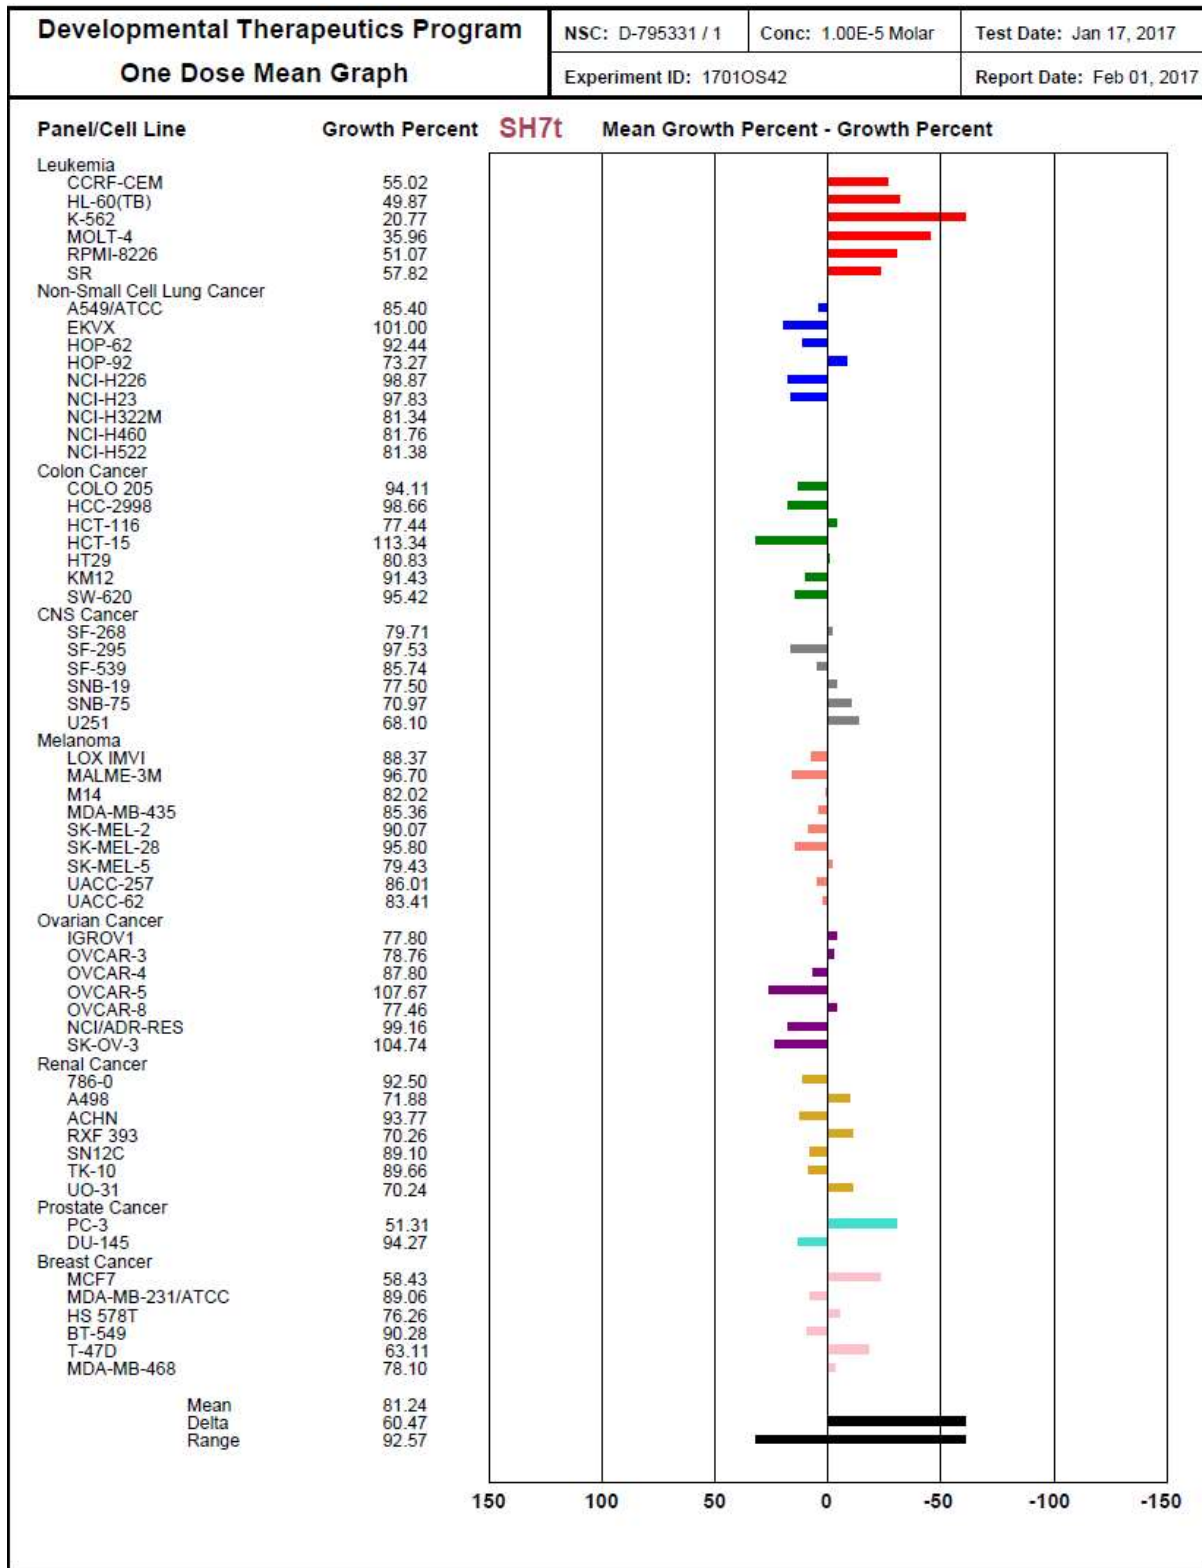

**Figure S93.** Single dose assay of compound 7t a panel of 60 cancer cell lines.

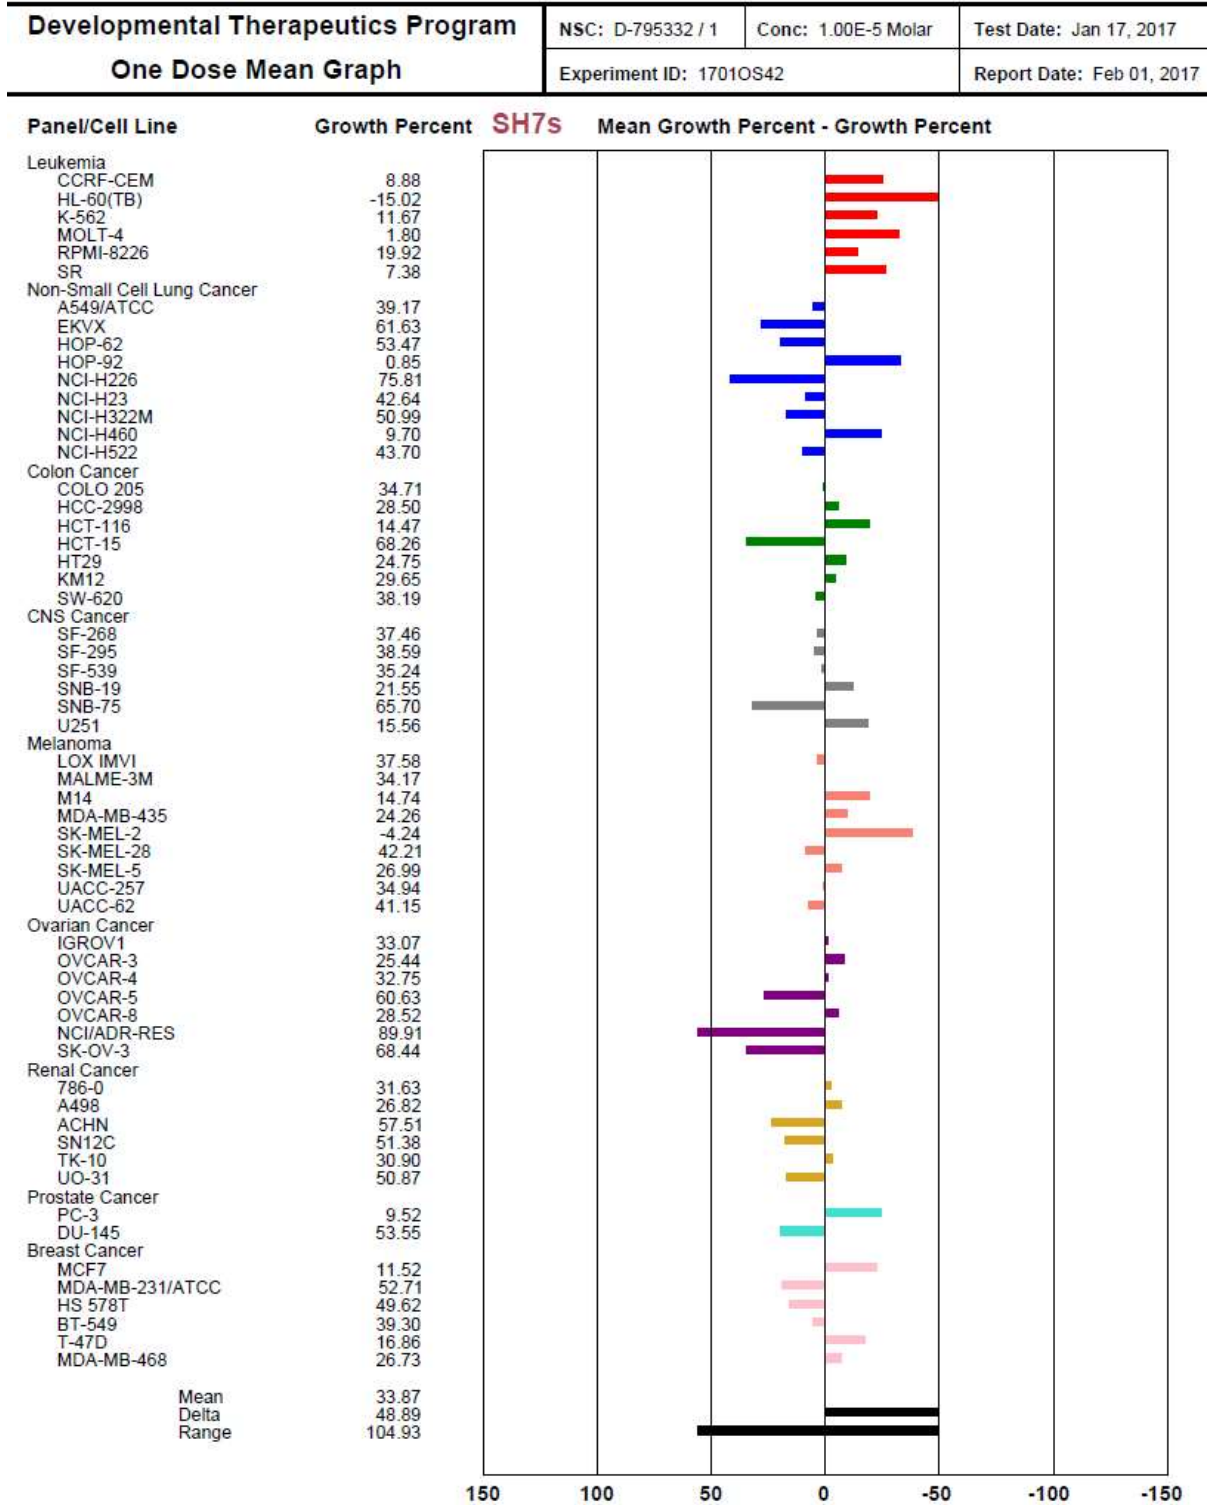

Figure S94. Single dose assay of compound 7s a panel of 60 cancer cell lines.



Supporting information

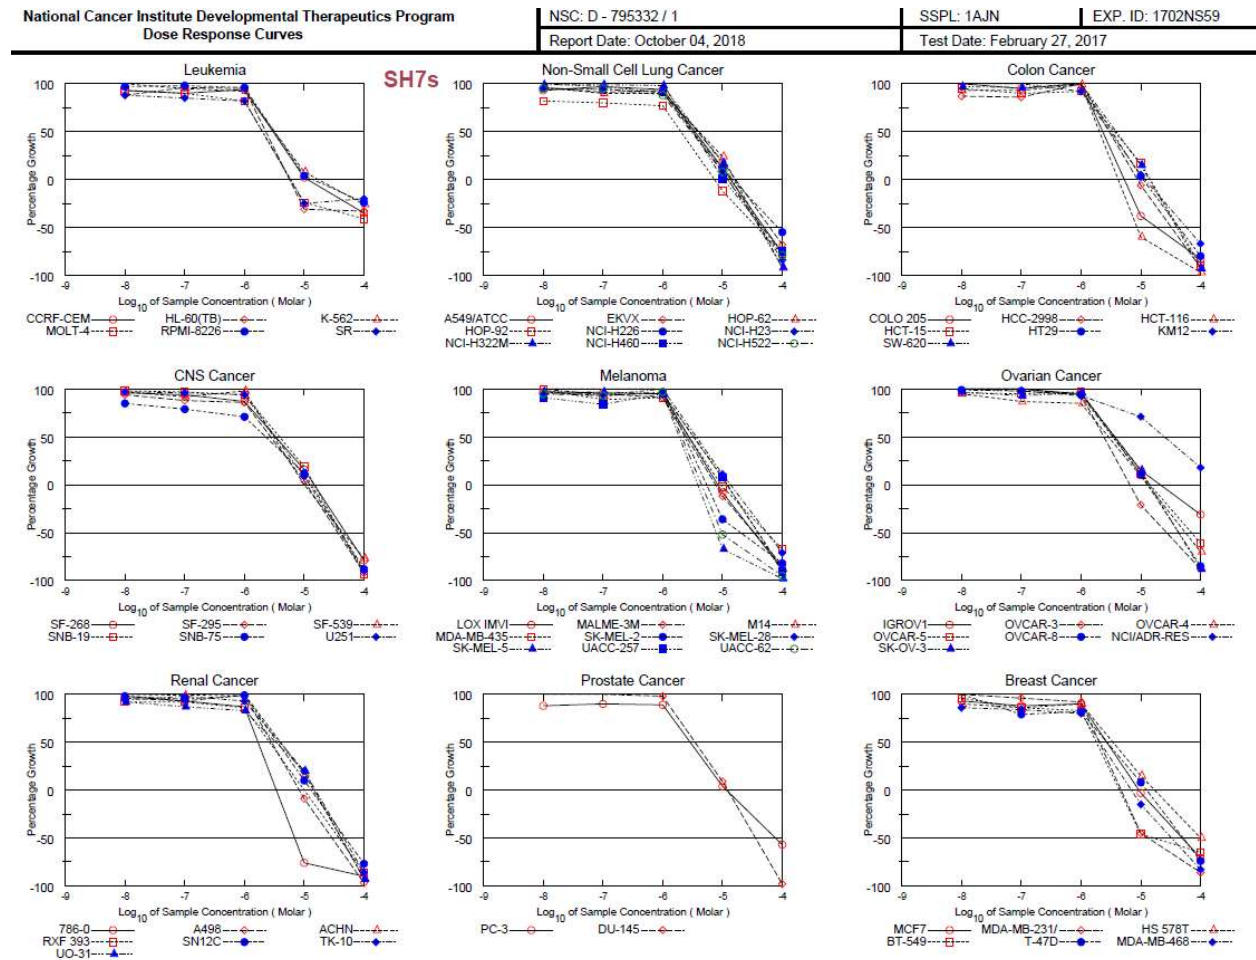

Figure S95. Five dose assay of compound 7s a panel of 60 cancer cell lines.

| National Cancer Institute Developmental Therapeutics Program<br>In-Vitro Testing Results |           |                        |                                       |       |       |       |                |                |      |      |               |      |         |           |           |
|------------------------------------------------------------------------------------------|-----------|------------------------|---------------------------------------|-------|-------|-------|----------------|----------------|------|------|---------------|------|---------|-----------|-----------|
| NSC : D - 795332 / 1                                                                     |           |                        | Experiment ID : 1702NS59              |       |       |       | Test Type : 08 |                |      |      | Units : Molar |      |         |           |           |
| Report Date : October 04, 2018                                                           |           |                        | Test Date : February 27, 2017         |       |       |       | QNS :          |                |      |      | MC :          |      |         |           |           |
| COMI : SH7s                                                                              |           |                        | Stain Reagent : SRB Dual-Pass Related |       |       |       | SSPL : 1AJN    |                |      |      |               |      |         |           |           |
| Panel/Cell Line                                                                          | Time Zero | Log10 Concentration    |                                       |       |       |       |                |                |      |      |               |      | GI50    | TGI       | LC50      |
|                                                                                          |           | Mean Optical Densities |                                       |       |       |       |                | Percent Growth |      |      |               |      |         |           |           |
|                                                                                          |           | Ctrl                   | -8.0                                  | -7.0  | -6.0  | -5.0  | -4.0           | -8.0           | -7.0 | -6.0 | -5.0          | -4.0 |         |           |           |
| <b>Leukemia</b>                                                                          |           |                        |                                       |       |       |       |                |                |      |      |               |      |         |           |           |
| CCRF-CEM                                                                                 | 0.560     | 3.030                  | 2.857                                 | 2.780 | 2.881 | 0.607 | 0.366          | 93             | 90   | 94   | 2             | -35  | 3.00E-6 | 1.13E-5   | > 1.00E-4 |
| HL-60(TB)                                                                                | 0.894     | 2.942                  | 2.692                                 | 2.860 | 2.839 | 0.617 | 0.595          | 88             | 96   | 95   | -31           | -33  | 2.27E-6 | 5.67E-6   | > 1.00E-4 |
| K-562                                                                                    | 0.149     | 1.482                  | 1.482                                 | 1.412 | 1.370 | 0.251 | 0.111          | 100            | 95   | 92   | 8             | -26  | 3.13E-6 | 1.69E-5   | > 1.00E-4 |
| MOLT-4                                                                                   | 0.784     | 2.908                  | 2.753                                 | 2.704 | 2.526 | 0.599 | 0.465          | 93             | 90   | 82   | -24           | -41  | 2.01E-6 | 5.97E-6   | > 1.00E-4 |
| RPMI-8226                                                                                | 0.926     | 3.055                  | 2.996                                 | 3.007 | 2.965 | 1.003 | 0.703          | 97             | 98   | 96   | 4             | -24  | 3.14E-6 | 1.35E-5   | > 1.00E-4 |
| SR                                                                                       | 0.329     | 1.338                  | 1.217                                 | 1.184 | 1.157 | 0.247 | 0.264          | 88             | 85   | 82   | -25           | -20  | 1.99E-6 | 5.83E-6   | > 1.00E-4 |
| <b>Non-Small Cell Lung Cancer</b>                                                        |           |                        |                                       |       |       |       |                |                |      |      |               |      |         |           |           |
| A549(ATCC)                                                                               | 0.226     | 1.346                  | 1.268                                 | 1.314 | 1.284 | 0.361 | 0.051          | 93             | 97   | 94   | 12            | -77  | 3.46E-6 | 1.36E-5   | 4.94E-5   |
| EKVX                                                                                     | 0.632     | 2.022                  | 1.961                                 | 1.890 | 1.922 | 0.890 | 0.201          | 96             | 91   | 93   | 19            | -68  | 3.77E-6 | 1.64E-5   | 6.17E-5   |
| HOP-62                                                                                   | 0.593     | 1.598                  | 1.562                                 | 1.500 | 1.500 | 0.836 | 0.046          | 96             | 90   | 90   | 24            | -92  | 4.07E-6 | 1.61E-5   | 4.33E-5   |
| HOP-92                                                                                   | 1.333     | 1.992                  | 1.871                                 | 1.860 | 1.842 | 1.172 | 0.293          | 82             | 80   | 77   | -12           | -78  | 2.02E-6 | 7.32E-6   | 3.75E-5   |
| NCI-H226                                                                                 | 0.900     | 2.325                  | 2.254                                 | 2.234 | 2.191 | 1.056 | 0.405          | 95             | 94   | 91   | 11            | -55  | 3.23E-6 | 1.46E-5   | 8.40E-5   |
| NCI-H23                                                                                  | 0.771     | 2.302                  | 2.298                                 | 2.250 | 2.163 | 0.901 | 0.125          | 100            | 97   | 91   | 8             | -84  | 3.14E-6 | 1.24E-5   | 4.30E-5   |
| NCI-H322M                                                                                | 0.737     | 1.767                  | 1.760                                 | 1.753 | 1.745 | 0.912 | 0.060          | 99             | 99   | 98   | 17            | -92  | 3.91E-6 | 1.43E-5   | 4.12E-5   |
| NCI-H460                                                                                 | 0.245     | 2.405                  | 2.466                                 | 2.411 | 2.583 | 0.270 | 0.062          | 104            | 100  | 108  | 1             | -75  | 3.50E-6 | 1.04E-5   | 4.73E-5   |
| NCI-H522                                                                                 | 0.925     | 2.166                  | 2.103                                 | 2.109 | 2.020 | 1.021 | 0.193          | 95             | 95   | 88   | 8             | -79  | 2.98E-6 | 1.23E-5   | 4.61E-5   |
| <b>Colon Cancer</b>                                                                      |           |                        |                                       |       |       |       |                |                |      |      |               |      |         |           |           |
| COLO 205                                                                                 | 0.417     | 1.604                  | 1.669                                 | 1.541 | 1.608 | 0.259 | 0.069          | 105            | 95   | 100  | -38           | -83  | 2.31E-6 | 5.31E-6   | 1.84E-5   |
| HCC-2998                                                                                 | 0.779     | 2.377                  | 2.162                                 | 2.160 | 2.456 | 0.733 | 0.061          | 87             | 86   | 105  | -6            | -92  | 3.13E-6 | 8.85E-6   | 3.24E-5   |
| HCT-116                                                                                  | 0.203     | 1.696                  | 1.597                                 | 1.586 | 1.685 | 0.082 | 0.006          | 93             | 93   | 99   | -60           | -97  | 2.04E-6 | 4.21E-6   | 8.70E-6   |
| HCT-15                                                                                   | 0.357     | 2.360                  | 2.260                                 | 2.160 | 2.198 | 0.698 | 0.036          | 95             | 90   | 92   | 17            | -90  | 3.63E-6 | 1.44E-5   | 4.23E-5   |
| HT29                                                                                     | 0.269     | 1.773                  | 1.802                                 | 1.767 | 1.902 | 0.315 | 0.055          | 102            | 100  | 109  | 3             | -80  | 3.59E-6 | 1.09E-5   | 4.39E-5   |
| KM12                                                                                     | 0.400     | 2.436                  | 2.438                                 | 2.466 | 2.282 | 0.493 | 0.132          | 100            | 101  | 92   | 5             | -67  | 3.04E-6 | 1.16E-5   | 5.79E-5   |
| SW-620                                                                                   | 0.236     | 1.637                  | 1.599                                 | 1.582 | 1.631 | 0.447 | 0.016          | 97             | 96   | 100  | 15            | -93  | 3.86E-6 | 1.38E-5   | 3.98E-5   |
| <b>CNS Cancer</b>                                                                        |           |                        |                                       |       |       |       |                |                |      |      |               |      |         |           |           |
| SF-268                                                                                   | 0.654     | 2.276                  | 2.206                                 | 2.180 | 2.072 | 0.913 | 0.137          | 96             | 94   | 87   | 16            | -79  | 3.34E-6 | 1.47E-5   | 4.94E-5   |
| SF-295                                                                                   | 0.647     | 2.094                  | 2.011                                 | 1.922 | 1.886 | 0.700 | 0.052          | 94             | 88   | 86   | 4             | -92  | 2.72E-6 | 1.09E-5   | 3.64E-5   |
| SF-539                                                                                   | 0.942     | 2.627                  | 2.579                                 | 2.490 | 2.588 | 0.938 | 0.215          | 97             | 92   | 98   | -             | -77  | 3.06E-6 | 9.90E-6   | 4.42E-5   |
| SNB-19                                                                                   | 0.568     | 1.879                  | 1.858                                 | 1.838 | 1.797 | 0.817 | 0.037          | 98             | 97   | 94   | 19            | -93  | 3.85E-6 | 1.47E-5   | 4.10E-5   |
| SNB-75                                                                                   | 0.867     | 1.785                  | 1.647                                 | 1.588 | 1.522 | 0.981 | 0.103          | 85             | 79   | 71   | 12            | -88  | 2.30E-6 | 1.33E-5   | 4.18E-5   |
| U251                                                                                     | 0.451     | 2.116                  | 2.072                                 | 2.048 | 2.022 | 0.599 | 0.045          | 97             | 96   | 94   | 9             | -90  | 3.30E-6 | 1.23E-5   | 3.93E-5   |
| <b>Melanoma</b>                                                                          |           |                        |                                       |       |       |       |                |                |      |      |               |      |         |           |           |
| LOX IMVI                                                                                 | 0.430     | 2.503                  | 2.440                                 | 2.425 | 2.409 | 0.396 | 0.054          | 97             | 96   | 95   | -8            | -88  | 2.75E-6 | 8.36E-6   | 3.37E-5   |
| MALME-3M                                                                                 | 0.642     | 1.164                  | 1.139                                 | 1.139 | 1.117 | 0.568 | 0.104          | 95             | 95   | 91   | -12           | -84  | 2.51E-6 | 7.72E-6   | 3.40E-5   |
| M14                                                                                      | 0.475     | 1.896                  | 1.849                                 | 1.795 | 1.842 | 0.581 | 0.056          | 97             | 93   | 96   | 7             | -88  | 3.32E-6 | 1.20E-5   | 3.99E-5   |
| MDA-MB-435                                                                               | 0.393     | 2.320                  | 2.299                                 | 2.102 | 2.147 | 0.387 | 0.131          | 99             | 89   | 91   | -2            | -67  | 2.77E-6 | 9.60E-6   | 5.54E-5   |
| SK-MEL-2                                                                                 | 1.160     | 2.267                  | 2.377                                 | 2.329 | 2.307 | 0.742 | 0.204          | 110            | 106  | 104  | -36           | -82  | 2.42E-6 | 5.52E-6   | 2.00E-5   |
| SK-MEL-28                                                                                | 0.680     | 1.947                  | 1.952                                 | 1.866 | 1.971 | 0.822 | 0.195          | 100            | 94   | 102  | 11            | -71  | 3.73E-6 | 1.37E-5   | 5.51E-5   |
| SK-MEL-5                                                                                 | 0.719     | 3.025                  | 2.959                                 | 2.946 | 2.915 | 0.235 | 0.017          | 97             | 97   | 95   | -67           | -98  | 1.90E-6 | 3.85E-6   | 7.82E-6   |
| UACC-257                                                                                 | 0.881     | 1.983                  | 1.886                                 | 1.809 | 1.932 | 0.966 | 0.076          | 91             | 84   | 95   | 8             | -91  | 3.29E-6 | 1.20E-5   | 3.82E-5   |
| UACC-62                                                                                  | 1.005     | 2.939                  | 2.838                                 | 2.810 | 2.889 | 0.478 | 0.048          | 95             | 93   | 97   | -52           | -95  | 2.07E-6 | 4.47E-6   | 9.63E-6   |
| <b>Ovarian Cancer</b>                                                                    |           |                        |                                       |       |       |       |                |                |      |      |               |      |         |           |           |
| IGROV1                                                                                   | 0.470     | 1.711                  | 1.721                                 | 1.725 | 1.646 | 0.660 | 0.323          | 101            | 101  | 95   | 15            | -31  | 3.66E-6 | 2.13E-5   | > 1.00E-4 |
| OVCAR-3                                                                                  | 0.440     | 1.643                  | 1.683                                 | 1.643 | 1.568 | 0.347 | 0.055          | 103            | 100  | 94   | -21           | -88  | 2.40E-6 | 6.53E-6   | 2.72E-5   |
| OVCAR-4                                                                                  | 0.805     | 1.738                  | 1.692                                 | 1.618 | 1.597 | 0.893 | 0.242          | 95             | 87   | 85   | 9             | -70  | 2.90E-6 | 1.31E-5   | 5.60E-5   |
| OVCAR-5                                                                                  | 0.530     | 1.726                  | 1.677                                 | 1.666 | 1.691 | 0.667 | 0.208          | 96             | 95   | 97   | 11            | -61  | 3.54E-6 | 1.44E-5   | 7.08E-5   |
| OVCAR-8                                                                                  | 0.232     | 1.162                  | 1.152                                 | 1.143 | 1.105 | 0.335 | 0.035          | 99             | 98   | 94   | 11            | -85  | 3.39E-6 | 1.30E-5   | 4.31E-5   |
| NCI/ADR-RES                                                                              | 0.539     | 1.898                  | 1.804                                 | 1.871 | 1.799 | 1.503 | 0.779          | 100            | 98   | 83   | 71            | 18   | 2.47E-5 | > 1.00E-4 | > 1.00E-4 |
| SK-OV-3                                                                                  | 0.808     | 2.011                  | 1.972                                 | 1.923 | 1.962 | 0.989 | 0.099          | 97             | 93   | 96   | 15            | -88  | 3.69E-6 | 1.40E-5   | 4.29E-5   |
| <b>Renal Cancer</b>                                                                      |           |                        |                                       |       |       |       |                |                |      |      |               |      |         |           |           |
| 786-0                                                                                    | 0.790     | 2.612                  | 2.568                                 | 2.482 | 2.371 | 0.191 | 0.081          | 98             | 93   | 87   | -76           | -90  | 1.68E-6 | 3.42E-6   | 6.94E-6   |
| A498                                                                                     | 1.338     | 2.046                  | 2.015                                 | 1.994 | 2.037 | 1.221 | 0.038          | 96             | 93   | 99   | -9            | -97  | 2.84E-6 | 8.28E-6   | 2.93E-5   |
| ACHN                                                                                     | 0.359     | 1.617                  | 1.679                                 | 1.600 | 1.617 | 0.567 | 0.029          | 105            | 99   | 100  | 17            | -92  | 3.97E-6 | 1.42E-5   | 4.10E-5   |
| RXF 393                                                                                  | 0.794     | 1.439                  | 1.387                                 | 1.390 | 1.349 | 0.789 | 0.111          | 92             | 92   | 86   | -             | -86  | 2.60E-6 | 9.83E-6   | 3.78E-5   |
| SN12C                                                                                    | 0.464     | 1.826                  | 1.796                                 | 1.758 | 1.814 | 0.606 | 0.106          | 98             | 95   | 99   | 10            | -77  | 3.58E-6 | 1.31E-5   | 4.89E-5   |
| TK-10                                                                                    | 0.839     | 1.965                  | 1.902                                 | 1.947 | 1.884 | 1.061 | 0.114          | 94             | 98   | 93   | 20            | -86  | 3.85E-6 | 1.53E-5   | 4.53E-5   |
| UO-31                                                                                    | 0.587     | 1.646                  | 1.558                                 | 1.505 | 1.471 | 0.803 | 0.042          | 92             | 87   | 83   | 20            | -93  | 3.39E-6 | 1.51E-5   | 4.18E-5   |
| <b>Prostate Cancer</b>                                                                   |           |                        |                                       |       |       |       |                |                |      |      |               |      |         |           |           |
| PC-3                                                                                     | 0.615     | 1.675                  | 1.545                                 | 1.569 | 1.561 | 0.653 | 0.266          | 88             | 90   | 89   | 4             | -57  | 2.87E-6 | 1.14E-5   | 7.71E-5   |
| DU-145                                                                                   | 0.411     | 1.771                  | 1.779                                 | 1.801 | 1.743 | 0.533 | 0.009          | 101            | 102  | 98   | 9             | -98  | 3.46E-6 | 1.21E-5   | 3.56E-5   |
| <b>Breast Cancer</b>                                                                     |           |                        |                                       |       |       |       |                |                |      |      |               |      |         |           |           |
| MCF7                                                                                     | 0.665     | 2.775                  | 2.624                                 | 2.519 | 2.559 | 0.643 | 0.194          | 93             | 88   | 90   | -3            | -71  | 2.67E-6 | 9.21E-6   | 4.91E-5   |
| MDA-MB-231(ATCC)                                                                         | 0.443     | 1.164                  | 1.169                                 | 1.135 | 1.109 | 0.245 | 0.061          | 101            | 96   | 92   | -45           | -86  | 2.04E-6 | 4.72E-6   | 1.34E-5   |
| HS 578T                                                                                  | 1.333     | 2.321                  | 2.221                                 | 2.179 | 2.227 | 1.477 | 0.673          | 90             | 86   | 90   | 15            | -50  | 3.41E-6 | 1.69E-5   | > 1.00E-4 |
| BT-549                                                                                   | 0.747     | 1.486                  | 1.456                                 | 1.386 | 1.363 | 0.403 | 0.263          | 96             | 86   | 83   | -46           | -65  | 1.81E-6 | 4.40E-6   | 1.61E-5   |
| T-47D                                                                                    | 0.754     | 1.677                  | 1.682                                 | 1.484 | 1.509 | 0.825 | 0.199          | 100            | 79   | 82   | 8             | -74  | 2.69E-6 | 1.24E-5   | 5.12E-5   |
| MDA-MB-468                                                                               | 0.980     | 1.933                  | 1.800                                 | 1.783 | 1.739 | 0.829 | 0.165          | 86             | 84   | 80   | -15           | -83  | 2.05E-6 | 6.88E-6   | 3.23E-5   |

Figure S96. Five dose assay of compound 7s a panel of 60 cancer cell lines.
